# Supplementary material for: The PI3K and MAPK/p38 pathways control stress granule assembly in a hierarchical manner
Source: Life Sci Alliance. 2019 Mar 28;2(2):e201800257. doi: 10.26508/lsa.201800257 (PMC6441495; doi:10.26508/lsa.201800257)
Supplement: Supplementary file 1 [file LSA-2018-00257_Supplemental_Data7.xlsx]

## Sheet: column headers
Data S7. Quantified experimental data used for model parameterization: Arsenite data set (Fig S1C), arsenite + wortmannin data set (Fig S3A), and arsenite + MK2206 data set (Fig S3C).
	Description
Experimental condition	Short description of the experimental conditions. Details are given in the material and methods section and the figure legends.
Readouts - average, SDEV and SEM	Quantification of the immunoblot data after normalization (average values across all biological replicates; standard deviation, STDEV; standard error of the mean, SEM). Normalization is described in the materials and methods section. For experiments including inhibitor treatments, arsenite + carrier control signals were normalized solely across the signals of the control treatment.
Number of biological replicates (n = )	The data sets for arsenite, arsenite + wortmanin and arsenite + MK2206 were conducted in 6, 3 and 4 biological replicates, respectively. Due to limitations in biological material, some readouts were analysed in fewer replicates. Therefore, the number of biological replicates is indicated for each readout.

## Sheet: arsenite
Quantification of arsenite data set (Fig S1C)
			readouts
	Akt-pT308 (n = 6)			Akt-pS473 (n = 6)			TSC2-pT1462 (n = 6)			PRAS40-pS183 (n = 4)			PRAS40-pT246 (n = 4)			4EBP1-pT37/46 (n = 6)			p70-S6K-pT229 (n = 4)			p70-S6K-pT389 (n = 6)			IRS1-pS636/639 (n = 6)
Experimental condition	average	SDEV	SEM	average	SDEV	SEM	average	SDEV	SEM	average	SDEV	SEM	average	SDEV	SEM	average	SDEV	SEM	average	SDEV	SEM	average	SDEV	SEM	average	SDEV	SEM
control (no arsenite)	0.192335	0.0742086	0.00927607	0.673873	0.268962	0.0336202	0.397275	0.109134	0.0136418	0.68563	0.193002	0.0241252	0.77938	0.0689156	0.00861445	0.594379	0.263858	0.0329823	0.315866	0.220489	0.0275612	0.2901	0.123837	0.0154796	0.304875	0.145301	0.0181626
arsenite 5 min	0.373741	0.186176	0.023272	0.767409	0.293613	0.0367016	0.836027	0.367433	0.0459291	1.00544	0.0687129	0.00858912	0.881508	0.150155	0.0187694	0.778863	0.254945	0.0318681	0.548612	0.283245	0.0354056	0.495212	0.130702	0.0163378	0.409472	0.225957	0.0282446
arsenite 10 min	0.854445	0.42965	0.0537062	1.07269	0.200414	0.0250517	0.884819	0.277095	0.0346369	1.15036	0.0548016	0.0068502	1.02125	0.156397	0.0195496	0.937813	0.26395	0.0329937	0.668602	0.287598	0.0359498	0.598576	0.262736	0.032842	0.446287	0.159321	0.0199152
arsenite 15 min	1.28625	0.444177	0.0555221	1.16079	0.282093	0.0352616	1.32282	0.467889	0.0584862	1.19106	0.171548	0.0214436	1.19968	0.266182	0.0332728	1.03117	0.271106	0.0338883	0.824398	0.206993	0.0258741	0.711944	0.225436	0.0281795	0.662182	0.0983962	0.0122995
arsenite 20 min	1.17826	0.552892	0.0691115	1.13841	0.176935	0.0221169	1.21717	0.166982	0.0208727	1.17414	0.152165	0.0190206	1.32231	0.25847	0.0323087	1.11869	0.297652	0.0372065	1.0686	0.298835	0.0373543	0.961632	0.168979	0.0211224	0.788837	0.207705	0.0259632
arsenite 30 min	1.46787	0.276556	0.0345696	1.14577	0.160874	0.0201092	1.19115	0.458418	0.0573023	1.15941	0.0434045	0.00542556	1.0763	0.0764951	0.00956189	1.29829	0.195021	0.0243777	1.30862	0.382996	0.0478745	1.32513	0.322909	0.0403636	1.47	0.463646	0.0579558
arsenite 45 min	1.70826	0.458581	0.0573226	1.16378	0.179735	0.0224669	1.34292	0.4045	0.0505625	1.04397	0.170364	0.0212955	1.05756	0.195603	0.0244504	1.3593	0.138602	0.0173252	1.60665	0.419014	0.0523767	1.85377	0.303221	0.0379026	1.76101	0.435889	0.0544861
arsenite 60 min	1.12855	0.260808	0.032601	0.942614	0.248793	0.0310992	1.02199	0.559657	0.0699571	0.648365	0.224998	0.0281248	0.757099	0.219642	0.0274553	1.03766	0.532465	0.0665581	1.87923	0.519059	0.0648824	1.84731	0.365128	0.045641	2.1615	0.256399	0.0320499

## Sheet: arsenite + wortmannin
Quantification of arsenite + wortmannin data set (Fig S3A)
			readouts
	Akt-pT308 (n = 3)			Akt-pS473 (n = 3)			TSC2-pT1462 (n = 3)			PRAS40-pS183 (n = 3)			PRAS40-pT246 (n = 3)			4EBP1-pT37/46 (n = 3)			p70-S6K-pT229 (n = 3)			p70-S6K-pT389 (n = 3)			IRS1-pS636/639 (n = 2)
Experimental condition	average	SDEV	SEM	average	SDEV	SEM	average	SDEV	SEM	average	SDEV	SEM	average	SDEV	SEM	average	SDEV	SEM	average	SDEV	SEM	average	SDEV	SEM	average	SDEV	SEM
control (no arsenite)	0.425008	0.12657	0.0210951	0.526115	0.146505	0.0244176	0.531932	0.0793269	0.0132211	0.832392	0.0581287	0.00968812	0.870618	0.133638	0.0222729	0.931927	0.220365	0.0367275	0.380638	0.0125901	0.00209835	0.28758	0.019734	0.00328899	0.335785	0.00321356	0.000535593
arsenite 5 min	0.444845	0.083924	0.0139873	0.526921	0.097696	0.0162827	0.504907	0.0589227	0.00982045	0.982604	0.278919	0.0464864	0.882577	0.100501	0.0167502	0.981557	0.0697616	0.0116269	0.476074	0.0990095	0.0165016	0.383898	0.0244347	0.00407244	0.364222	0.0673567	0.0112261
arsenite 15 min	1.19381	0.196224	0.0327039	1.2164	0.0291284	0.00485473	1.23461	0.0865834	0.0144306	1.02126	0.0876187	0.0146031	1.03956	0.111495	0.0185824	0.82503	0.162628	0.0271047	0.818907	0.170841	0.0284735	0.770686	0.060947	0.0101578	0.438908	0.0357379	0.00595631
arsenite 30 min	1.2045	0.273646	0.0456076	1.27676	0.0578497	0.00964162	1.02121	0.100414	0.0167356	0.944676	0.258441	0.0430735	1.16223	0.132436	0.0220726	0.937524	0.0293954	0.00489923	1.09069	0.279773	0.0466288	1.09336	0.345388	0.0575647	1.20425	0.380799	0.0634664
arsenite 45 min	1.59909	0.0539727	0.00899545	1.39971	0.248179	0.0413632	1.52132	0.224751	0.0374585	1.27596	0.177505	0.0295842	1.15379	0.242527	0.0404212	1.15991	0.230134	0.0383557	1.83405	0.493443	0.0822405	1.88626	0.522652	0.0871087	1.67107	0.0351636	0.0058606
arsenite 60 min	1.18855	0.0960225	0.0160038	1.15295	0.200262	0.033377	1.24202	0.112241	0.0187068	1.0549	0.158889	0.0264815	0.96125	0.0695923	0.0115987	1.30536	0.465004	0.0775007	1.56015	0.130894	0.0218157	1.76422	0.365533	0.0609222	1.83781	0.16709	0.0278484
control (no arsenite) + wortmannin	0.328706	0.25884	0.04314	0.0182181	0.00824531	0.00137422	0.14537	0.0974563	0.0162427	0.547345	0.176324	0.0293873	0.0184988	0.0138082	0.00230137	0.566167	0.119868	0.019978	0.194105	0.0737381	0.0122897	0.0848209	0.0649815	0.0108302	0.202151	0.0662162	0.011036
arsenite 5 min + wortmannin	0.263916	0.19563	0.032605	0.0203799	0.00126973	0.000211622	0.123937	0.0967963	0.0161327	0.478514	0.0528133	0.00880221	0.0195539	0.0173649	0.00289416	0.505594	0.120612	0.0201019	0.197887	0.0666118	0.011102	0.0823382	0.0498285	0.00830474	0.284865	0.0997296	0.0166216
arsenite 15 min + wortmannin	0.31168	0.230056	0.0383427	0.0858185	0.0377057	0.00628429	0.200119	0.0783964	0.0130661	0.463264	0.0681911	0.0113652	0.0277439	0.00815596	0.00135933	0.404889	0.0460991	0.00768319	0.234911	0.0406449	0.00677415	0.0986138	0.0562955	0.00938258	0.426072	0.126936	0.021156
arsenite 30 min + wortmannin	0.280691	0.187975	0.0313291	0.219649	0.0273653	0.00456089	0.285755	0.178713	0.0297856	0.561102	0.066862	0.0111437	0.0692647	0.0205862	0.00343103	0.611149	0.173056	0.0288427	0.389857	0.114886	0.0191477	0.250606	0.0689304	0.0114884	1.04972	0.2152	0.0358666
arsenite 45 min + wortmannin	0.393873	0.306246	0.051041	0.365454	0.00381727	0.000636212	0.485431	0.25657	0.0427617	0.703028	0.222196	0.0370326	0.19161	0.0270634	0.00451056	0.946323	0.0464466	0.00774109	1.30011	0.456632	0.0761053	1.04666	0.317322	0.052887	1.74427	0.714183	0.119031
arsenite 60 min + wortmannin	0.368301	0.287603	0.0479339	0.342146	0.0307147	0.00511911	0.577916	0.187789	0.0312982	0.889776	0.146712	0.024452	0.224767	0.0349168	0.00581947	0.881628	0.131441	0.0219068	1.16562	0.227561	0.0379268	0.91465	0.188128	0.0313546	2.14833	0.363842	0.0606404

## Sheet: arsenite + MK2206
Quantification of arsenite + MK2206 data set (Fig S3C)
			readouts
	Akt-pT308 (n = 3)			Akt-pS473 (n = 4)			TSC2-pT1462 (n = 3)			PRAS40-pS183 (n = 4)			PRAS40-pT246 (n = 4)			4EBP1-pT37/46 (n = 3)			p70-S6K-pT229 (n = 3)			p70-S6K-pT389 (n = 4)			IRS1-pS636/639 (n = 4)
Experimental condition	average	SDEV	SEM	average	SDEV	SEM	average	SDEV	SEM	average	SDEV	SEM	average	SDEV	SEM	average	SDEV	SEM	average	SDEV	SEM	average	SDEV	SEM	average	SDEV	SEM
control (no arsenite)	0.262706	0.11664	0.01944	0.731212	0.173713	0.0289522	0.611871	0.402929	0.0671549	0.834713	0.127338	0.021223	0.915807	0.215587	0.0359312	0.908334	0.181772	0.0302953	0.30575	0.116645	0.0194408	0.306458	0.150725	0.0251208	0.206504	0.113992	0.0189987
arsenite 5 min	0.44415	0.0762385	0.0127064	0.88527	0.21947	0.0365784	0.903261	0.323908	0.0539846	0.938935	0.0515252	0.00858754	0.827833	0.12292	0.0204867	0.825147	0.109413	0.0182356	0.531117	0.0530167	0.00883612	0.526836	0.126313	0.0210522	0.298122	0.0621767	0.0103628
arsenite 15 min	1.60339	0.582569	0.0970948	1.23368	0.210643	0.0351071	1.35621	0.179104	0.0298507	1.25121	0.0912585	0.0152097	1.20409	0.0972809	0.0162135	1.071	0.0940922	0.015682	0.845767	0.083498	0.0139163	0.897606	0.0993411	0.0165569	0.519513	0.0916473	0.0152745
arsenite 30 min	1.46415	0.809952	0.134992	1.12878	0.285317	0.0475528	1.15564	0.559309	0.0932182	1.08316	0.190633	0.0317722	1.06787	0.243136	0.0405226	0.964621	0.061534	0.0102557	1.45592	0.208561	0.0347602	1.27692	0.277533	0.0462555	1.16878	0.104177	0.0173629
arsenite 45 min	1.2873	0.288786	0.0481309	1.01221	0.233276	0.0388794	1.11911	0.206276	0.0343793	1.01182	0.0375171	0.00625286	1.0497	0.112513	0.0187522	1.14191	0.175745	0.0292908	1.46557	0.12112	0.0201866	1.50497	0.193212	0.032202	2.05146	0.330989	0.0551648
arsenite 60 min	1.20528	0.73201	0.122002	1.04044	0.159182	0.0265303	1.04984	0.394256	0.0657094	0.944344	0.0851965	0.0141994	1.01868	0.188454	0.0314091	1.12503	0.117494	0.0195823	1.70858	0.228269	0.0380448	1.76378	0.281211	0.0468685	2.13154	0.464746	0.0774577
control (no arsenite) + MK2206	0.0639952	0.0478986	0.00798311	0.0076338	0.00293823	0.000489705	0.115754	0.0755731	0.0125955	0.572146	0.211065	0.0351776	0.0287167	0.015644	0.00260733	0.548323	0.213677	0.0356128	0.121475	0.0544657	0.00907762	0.0699118	0.029405	0.00490084	0.179978	0.0999754	0.0166626
arsenite 5 min + MK2206	0.0665146	0.025853	0.00430884	0.0122443	0.00659595	0.00109932	0.218577	0.0568393	0.00947321	0.677856	0.151196	0.0251994	0.0361274	0.0128986	0.00214977	0.677114	0.150083	0.0250138	0.217589	0.0929627	0.0154938	0.145762	0.0581279	0.00968798	0.262211	0.197336	0.0328894
arsenite 15 min + MK2206	0.0854402	0.044761	0.00746017	0.0394018	0.00867313	0.00144552	0.190427	0.0410908	0.00684847	0.853397	0.0977456	0.0162909	0.0667171	0.0380731	0.00634552	0.691331	0.125806	0.0209676	0.322262	0.085178	0.0141963	0.322943	0.100395	0.0167325	0.3509	0.134841	0.0224736
arsenite 30 min + MK2206	0.0994943	0.0551384	0.00918973	0.12521	0.054242	0.00904033	0.363056	0.0565518	0.0094253	0.98002	0.138555	0.0230925	0.151527	0.0750115	0.0125019	0.957574	0.0568387	0.00947312	1.12288	0.540733	0.0901221	1.01091	0.355416	0.059236	0.970573	0.118713	0.0197855
arsenite 45 min + MK2206	0.0727231	0.0579404	0.00965674	0.161943	0.0831163	0.0138527	0.435098	0.071715	0.0119525	0.989006	0.231309	0.0385515	0.23048	0.0636748	0.0106125	0.971424	0.185639	0.0309399	1.31635	0.159174	0.0265289	1.37122	0.113027	0.0188379	1.97855	0.403612	0.0672687
arsenite 60 min + MK2206	0.0638178	0.0538392	0.0089732	0.177258	0.116898	0.019483	0.50556	0.252203	0.0420338	0.796105	0.266918	0.0444864	0.283736	0.119438	0.0199064	0.926202	0.259312	0.0432186	1.58988	0.214603	0.0357671	1.53848	0.25193	0.0419883	2.13428	0.169653	0.0282755
