# Supplementary material for: The PI3K and MAPK/p38 pathways control stress granule assembly in a hierarchical manner
Source: Life Sci Alliance. 2019 Mar 28;2(2):e201800257. doi: 10.26508/lsa.201800257 (PMC6441495; doi:10.26508/lsa.201800257)
Supplement: Supplementary file 7 [file LSA-2018-00257_Supplemental_Data6.xls]

## Sheet: description
Data S6. Text mining input and results.
	Description
text mining input	NCBI gene IDs (entrez IDs) that have been mapped to AKT isoforms and to PDK2s (PDK2 indicated in Fig S13H).
text mining results	This sheet contains all sentences where 1) a gene name associated to an entrez ID from the input list occurs, 2) another gene name was identified in the sentence, 3) a relation event (see methods for details) was identified linking the two identified gene names and 4) the word “stress” is occurring in the sentence. “Gene{1, 2} name” relate to the name as it was recognized in the text, while “Gene…
text mining results – frequencies	This sheet summarizes the frequencies of genes occurring as partners in a relation with any member of the input list (sheet “text mining input”). The frequencies are computed for the number of gene names given in the column “Gene2 PreferredName”.

## Sheet: text mining input
Entrez gene ID
207
208
3611
5578
5579
5591
9261
10000
11651
11652
16202
17164
18750
18751
19090
23797
24185
24680
25023
25233
29110
29414
35329
41957
48311
53573
56480
66725
120892
170922
175175
179424
181166
181524
280991
282001
282325
289014
299827
300160
327321
360748
374018
378972
393543
393953
395376
395928
416567
417430
417825
419847
421497
427844
442964
449021
452047
453993
454832
456035
464165
474176
476836
481145
486608
489968
490263
490878
490904
497384
512740
533141
534923
535652
540207
550101
559366
560549
562283
692289
695044
697747
697930
700591
701195
708029
709944
714717
717427
718412
740898
744091
745893
748941
780209
788091
1269396
1277157
1278787
1278956
1280437
2542293
100038043
100137872
100144709
100145062
100145644
100216212
100331515
100488663
100490038
100609583
101749801

## Sheet: text mining results
Gene1 Name	Gene1 EntrezID	Gene1 PreferredName	Gene2 Name	Gene2 EntrezID	Gene2 PreferredName	Medline ID	PMC ID	Sentence
AKT1	207	AKT1	AATF	26574	AATF	19911006		We show that AATF is induced by ER stress through the PERK-eIF2alpha pathway and transcriptionally activates the v-akt murine thymoma viral oncogene homolog 1 (AKT1) gene through signal transducer and activator of transcription 3 (Stat3), which sustains Akt1 activation and promotes cell survival.
v-akt murine thymoma viral oncogene homolog 1	207	AKT1	AATF	26574	AATF	19911006		We show that AATF is induced by ER stress through the PERK-eIF2alpha pathway and transcriptionally activates the v-akt murine thymoma viral oncogene homolog 1 (AKT1) gene through signal transducer and activator of transcription 3 (Stat3), which sustains Akt1 activation and promotes cell survival.
Akt1	280991	AKT1	AATF	114512	AATF		PMC2854298	We found that AATF induces Akt1 together with Stat3 under ER stress conditions.
Akt	207	AKT1	ABL1	25	ABL1		PMC4661907	This is important as it leads to the conclusion that ROS-induced genomic instability in CML cells begins in LSCs and progresses in LPCs, which was supported by the observation that mutations in the BCR-ABL1 gene associated with TKI resistance were observed in CP CML in the CD34+ CD38− (stem) and CD34+ CD38+ (progenitor) cells []. BCR-ABL1 activates Akt signaling that inhibits the forkhead O trans…
Rac	207	AKT1	ABL	25	ABL1	17090304		We investigated the effects of BCR and ABL/BCRs i.) on the activation status of Rho, Rac and cdc42 in GTPase-activation assays; ii.) on the actin cytoskeleton by direct immunofluorescence; and iii) on cell motility by studying migration into a three-dimensional stroma spheroid model, adhesion on an endothelial cell layer under shear stress in a flow chamber model, and chemotaxis and endothelial t…
Rac	11651	AKT1	ABL	11350	ABL1		PMC1637115	Methods We investigated the effects of BCR and ABL/BCRs i.) on the activation status of Rho, Rac and cdc42 in GTPase-activation assays; ii.) on the actin cytoskeleton by direct immunofluorescence; and iii) on cell motility by studying migration into a three-dimensional stroma spheroid model, adhesion on an endothelial cell layer under shear stress in a flow chamber model, and chemotaxis and endot…
DNA-PKcs	5591	PRKDC	c-ABL protein	25	ABL1		PMC3650303	The non-mutated c-ABL protein is activated by DNA-PKcs and ATM in response to genotoxic stress (Kharbanda et al., ; Baskaran et al., ).
Akt	207	AKT1	Adiponectin	9370	ADIPOQ	18267956		Adiponectin also suppressed VEGF-induced reactive oxygen species generation, activation of Akt, the mitogen-activated protein kinase ERK and the RhoGTPase RhoA, and induction of the formation of actin stress fibres and focal cellular adhesions.
Akt	207	AKT1	adiponectin	9370	ADIPOQ		PMC3084258	The former has been shown to occur via AMPK and COX-2 dependent mechanisms and via reduction of oxidative/nitrative stress and activation of Akt by adiponectin was also suggested to play a protective role .
Rac GTPase family members	207	AKT1	AFAP1	70292	AFAP1		PMC5006422	In this study, they found that AFAP1-AS1 knockdown could induce the loss of stress filament integrity and affect the expression of Rho/Rac GTPase family members and actin cytokeratin signaling pathway proteins in nasopharyngeal cancer cells, so we speculate that AFAP1-AS1 knockdown could also affect actin cytoskeleton via small Rho GTPase in colorectal cancer cell, we will confirm it in the furth…
PDK1	830330	PDPK1	OXI1	822119	AGC2-1		PMC3927260	Preferential high expression of thioredoxin and glutaredoxin genes, no repression of WRKY25, WRKY33, and Zat12 by MEKK1-MKK1/MKK2-MPK4 cascade, and no induction of OXI1 by PLC/D-PA-PDK1 pathway are different from those under abiotic and biotic stress.
Rac	207	AKT1	RAGE	11596	AGER		PMC5559841	RAGE can mediates the transport of Aβ40 or Aβ42 across BBB into brain, resulting in endothelial cell oxidative stress and expression of proinflammatory cytokines and NF-κB through redox-dependent activation of Ras-ERK1/2 pathway, p38 MAP (p38), Cdc42/Rac pathway and SAPK/JNK kinase pathways [], which finally leads to cell apoptosis, inflammatory response and vascular dysfunction.
Rac	11651	AKT1	RAGE	11596	AGER		PMC4159787	RAGE has been reported to induce transduction pathways involving Ras (related with apoptosis through interaction with AGE in response to oxidative stress) [], Rac/Cdc42 (related with neurite outgrowth through binding with amphoterin) [], Jak/signal transducer and activator of transcription (Jak/STAT) (related with alteration of gene expression/cytokine production through interation with HMGB1) [,…
Akt	207	AKT1	angiotensin II	183	AGT	27821539		These findings indicate that endothelial-derived MPs from ACS patients induce premature endothelial senescence under atheroprone low shear stress and thrombogenicity through angiotensin II-induced redox-sensitive activation of mitogen-activated protein kinases and phosphoinositide 3-kinase/Akt.
Akt	207	AKT1	cardiac Ang II	11606	AGT		PMC3928588	Xu et al. () found that when hemodynamic loading conditions remain unchanged, cardiac Ang II does not elicit hypertrophy but in animals with hypertension, cardiac Ang II, acting via AT(1)R, increases oxidative stress, inflammation, ventricular hypertrophy, and cell death (probably via down regulation of PI 3 kinase and Akt).
Akt-1	207	AKT1	AT2R	186	AGTR2	18096165		Thus, AT2R upregulation can reduce atherogenesis, possibly by modulating oxidative stress and the pro-inflammatory cascade, mediated via Akt-1.
PKC-beta	5579	PRKCB	aldose reductase	231	AKR1B1	10818070		These findings suggest that high glucose concentrations potentiate SMC migration in coronary artery and that the aldose reductase inhibitor epalrestat inhibits high glucose-potentiated, PDGF BB-induced SMC migration, possibly through suppression of PKC (PKC-beta), impaired insulin-mediated glucose uptake, and oxidative stress.
Akt2	208	AKT2	Akt1	207	AKT1	21303257		Knockdown of Akt1 promotes Akt2 upregulation and resistance to oxidative-stress-induced apoptosis through control of multiple signaling pathways.
AKT	207	AKT1	ALDH1	216	ALDH1A1		PMC4609379	The retinoic acid system is involved in chromosome stability and epigenetic regulation and is probably a protective mechanism against alterations in stem cells related to oxidative stress []. ALDH1 is also involved in the modulation of various signalling pathways (e.g., AKT/β-catenin, WNT, and p21-p53…) which are in turn involved in the molecular regulation of cancer stem cells.
Akt-1	207	AKT1	ANG	283	ANG	19109488		Expression of wild-type ANG protected against endoplasmic reticulum (ER) stress-induced and trophic-factor-withdrawal-induced cell death in vitro, whereas the ALS-associated ANG mutant K40I exerted no protective activity and failed to activate Akt-1.
Akt	11651	AKT1	angiopoietin-1	284	ANGPT1		PMC3096078	In addition, it was also shown that several other stimuli including insulin-like growth factor-I (IGF-I) [], insulin [], angiopoietin-1 (Ang-1) [], hepatocyte growth factor [], the small proteoglycan decorin [], fluid shear stress [], sphingosine-1-phosphate (S1P) [], estrogen [], reactive oxygen species [], and corticosteroids [] also activate Akt signaling, illustrating the central role of this…
Akt	11651	AKT1	Ang-1	284	ANGPT1		PMC3096078	In addition, it was also shown that several other stimuli including insulin-like growth factor-I (IGF-I) [], insulin [], angiopoietin-1 (Ang-1) [], hepatocyte growth factor [], the small proteoglycan decorin [], fluid shear stress [], sphingosine-1-phosphate (S1P) [], estrogen [], reactive oxygen species [], and corticosteroids [] also activate Akt signaling, illustrating the central role of this…
Akt	24185	AKT1	Ang II	285	ANGPT2		PMC3399393	These effects are likely also indirectly mediated through the Ang II-generated oxidative stress, since Ang II has been shown to inhibit Akt phosphorylation and, consequently, GLUT-4 transporter translocation to the plasma membrane in an NAD(P)H oxidase-dependent manner via tyrosine nitration, probably through formation of peroxynitrate [].
Akt2	25233	AKT2	Ankrd2	26287	ANKRD2		PMC3960238	Further indication of the importance of Ankrd2 was the finding that oxidative stress caused by hydrogen peroxide activated the Akt2 mediated phosphorylation of Ankrd2 (Ser-99) .
AKT	24185	AKT1	apelin	282143	APLN		PMC5253351	Moreover, apelin significantly reduces ER stress and infarct size via a PI3K/AKT-dependent pathway (Tao et al., ).
AKT	207	AKT1	APP	351	APP	28819903		Taken together, our results indicate that the neuroprotective role of bpv involves the suppression of ER stress via the activation of the PI3K/AKT signalling pathways in APP/PS1 transgenic AD model mice.
Akt	207	AKT1	APP	351	APP	25165877		Collectively, our data provide new mechanistic insights into the physiologic role of APP in antagonizing neurotoxic stress: they suggest that cell surface APP mediates sAPPα-induced neuroprotection via G-protein-coupled activation of the Akt pathway.
Akt	207	AKT1	AMP	353	APRT		PMC4462353	Figure 5 Discussion Here, for the first time we reveal that AMP can induce protective autophagy through Akt-mTOR signaling pathway via ER stress in human breast cancer MCF-7 and MDA-MB-231 cells.
Akt	207	AKT1	AMP	353	APRT		PMC4462353	As shown in Figure(a,b), accompanied with downregulating AMP-induced expressions of ER stress-associated proteins including PERK, p-elF2α and cleaved ATF6α, ER stress inhibitor 4-PBA partially restored AMP- induced phosphorylation of Akt, mTOR and p70S6K in MCF-7 and MDA-MB-231 cells.
Rac	11651	AKT1	ARHGAP15	55843	ARHGAP15		PMC5467205	ARHGAP15s activation of Rac affects the actin cytoskeleton and cell morphogenesis and overexpression of ARHGAP15 causes increase in actin stress fibres and cell contraction.
Rac	207	AKT1	ARHGDIA	396	ARHGDIA		PMC4991396	Of the three isoforms of RhoGDI identified to date, ARHGDIA is ubiquitously expressed and interacts with all three key Rho GTPases, including RhoA, Cdc42 and Rac []. RhoGDIs bind to Rho GTPases and maintain them in a biologically inactive state in the cytoplasm, which affects the regulation of actin cytoskeleton processes, including formation of focal adhesions, stress fibers, lamellipodia and fi…
mitogen-activated protein kinase	3611	ILK	ATF2	1386	ATF2		PMC4852903	The bead based kit was used to look for changes in signal transducer and activator of transcription 1 (STAT1), activating transcription factor 2 (ATF2), extracellular signal-regulated kinase (Erk), heat shock 27kDa protein 1 (HSP27), c-Jun N-terminal kinase (JNK), jun proto-oncogene (c-Jun), dual specificity mitogen-activated protein kinase kinase 1 (Map2K1 or MEK1), mitogen- and stress-activated…
mitogen-activated protein kinase	3611	ILK	activating transcription factor 2	1386	ATF2		PMC4852903	The bead based kit was used to look for changes in signal transducer and activator of transcription 1 (STAT1), activating transcription factor 2 (ATF2), extracellular signal-regulated kinase (Erk), heat shock 27kDa protein 1 (HSP27), c-Jun N-terminal kinase (JNK), jun proto-oncogene (c-Jun), dual specificity mitogen-activated protein kinase kinase 1 (Map2K1 or MEK1), mitogen- and stress-activated…
DNA repair proteins DNA-PKcs	5591	PRKDC	ATF4	468	ATF4	23001845		IRE1α and ATF4, as the important ER stress molecules, could inhibit the expression of DNA repair proteins DNA-PKcs, XRCC1, and HSP70 under heat shock.
DNA-PKcs	5591	PRKDC	ATF4	468	ATF4	23001845		It was indicated that ATF4 and IRE1α could inhibit the expression of DNA-PKcs and XRCC1 under the heat stress.
Akt	11651	AKT1	ATM	472	ATM		PMC4817090	Given its ability to activate ATM, AMPK, and Akt—which together play prominent roles in responsive to genotoxic, oxidative, and metabolic stress, are central regulators of fuel uptake, storage, and oxidation, and play key cardioprotective roles—CQ can exert positive metabolic effects, even in cell types in which ATM does not activate AMPK or Akt.
DNA-PKcs	5591	PRKDC	ATM	472	ATM	25224041		We hypothesize that DNA-PKcs may participate in the regulation of ATM activation in response to oxidative stress, and that this regulatory role is independent of its role in DNA double-strand break repair.
DNA-PKcs	5591	PRKDC	ATM	472	ATM	22226932		The induction of autophagy by genotoxic stress likely contributes to the sustained survival of breast cancer cells through DNA repair regulated by ATM-mediated activation of DNA-PKcs and PARP-1.
DNA-PK	5591	PRKDC	ATM	472	ATM		PMC3141247	In response to DNA damage, H2AX has been reported to be phosphorylated by ATM, ATR, which is mainly associated to replication stress (), as well as DNA-PK, observed during apoptotic DNA fragmentation ().
DNA-PKcs	5591	PRKDC	ATM	472	ATM		PMC3337166	However, interdependent activation between ATM and ATR is also observed [-(a)].- In addition, ATM or ATR phosphorylates DNA-PKcs in response to IR or UV/replication stress and the former is important for cellular radio-resistance and NHEJ [-(b)]., Conversely, DNA-PKcs regulates the abundance of ATM and SMG-1 [-(c)]., SMG-1 also activates in response to IR and UV, and phosphorylates p53 together w…
AKT1	11651	AKT1	E2	11973	ATP6V1E1		PMC5341901	Consequently, the PI3K-AKT-mTOR pathway is stressed in multiple ways in BRCA1-deficient cells: E2 directly activates PI3K and AKT1, IGF1 activates the pathway by binding to IGF1R, and ERα provokes the phosphorylation of AKT1, while the inhibition of the latter by BRCA1 is hampered [–].
Akt	24185	AKT1	ATR	545	ATR		PMC5466315	This result supported the notion that activation of Akt signaling by α-asarone, β-asarone or ATR oil was a key step in protecting cells from oxidative stress-induced cell injury.
DNA-PK	5591	PRKDC	ATR	545	ATR		PMC3566207	Notably ATR-dependent activation of DNA-PK has previously been observed subsequent to UV-induced replication stress in HeLa cells and this activation was mediated by phosphorylations on DNA-PK distinct from those observed subsequent to ionizing radiation .
DNA-PK	5591	PRKDC	ATR	545	ATR		PMC3141247	In response to DNA damage, H2AX has been reported to be phosphorylated by ATM, ATR, which is mainly associated to replication stress (), as well as DNA-PK, observed during apoptotic DNA fragmentation ().
DNA-dependent protein kinase catalytic subunit	5591	PRKDC	Atr	545	ATR		PMC5161750	DNA-dependent protein kinase catalytic subunit (DNA-PKcs) can activate a checkpoint under conditions of Atr inhibition and replicative stress ().
DNA-PKcs	5591	PRKDC	Atr	545	ATR		PMC5161750	DNA-dependent protein kinase catalytic subunit (DNA-PKcs) can activate a checkpoint under conditions of Atr inhibition and replicative stress ().
Akt	11651	AKT1	BAD	572	BAD		PMC3321461	In addition, Akt can directly regulate apoptosis by phosphorylating and inactivating proapoptotic proteins such as BAD, which controls the release of cytochrome c from mitochondria, and apoptosis signal-regulating kinase-1 (ASK1), a mitogen-activated protein kinase kinase involved in stress- and cytokine-induced cell death.
Akt	207	AKT1	Bak	578	BAK1	25183449		Taken together, these results suggest that suppression of lipid raft-associated PI3K/Akt signaling is required for the ER stress-mediated apoptotic activity of Bax/Bak, which is responsible for the ability of TSWU-CD4-treated cancer cells to exit the ER-mitochondrial apoptotic cell death pathway.
Akt	207	AKT1	Bax	581	BAX	18299320		During stress, Hsp27 expression prevented the inactivation of Akt, a pro-survival kinase, and increased the interaction between Akt and Bax, an Akt substrate.
Akt	207	AKT1	Bax	581	BAX	25183449		Taken together, these results suggest that suppression of lipid raft-associated PI3K/Akt signaling is required for the ER stress-mediated apoptotic activity of Bax/Bak, which is responsible for the ability of TSWU-CD4-treated cancer cells to exit the ER-mitochondrial apoptotic cell death pathway.
Akt	207	AKT1	Bax	581	BAX	25183449		Suppression of PI3K/Akt signaling by synthetic bichalcone analog TSWU-CD4 induces ER stress- and Bax/Bak-mediated apoptosis of cancer cells.
Akt	207	AKT1	Bcl-xL	282152	BCL2L1		PMC5401887	It has been well known that MEK/Erk and PI3-K/Akt pathways can mediate the upregulation of Bcl-xL, a death-inhibitory member of the Bcl-2 family that blocks the stress-induced release of cytochrome c (Ramljak et al., ; Vega et al., ).
Akt	207	AKT1	Bim	10018	Bcl2l11		PMC4514125	PI3K/Akt blocks the ER stress-mediated apoptotic-signalling pathway by regulating Bim expression in two ways.
AKT	207	AKT1	BCL-3	602	BCL3		PMC4941180	However, it is important to stress that in the current study AKT activation by BCL-3 was clearly detected in more than one carcinoma cell line (we have detected BCL-3-induced AKT activation in SW480, SW620, HCA7, HT29 and HCT116 cells) as well as RG/C2 adenoma-derived cells.
Akt	207	AKT1	BCR	613	BCR		PMC4661907	This is important as it leads to the conclusion that ROS-induced genomic instability in CML cells begins in LSCs and progresses in LPCs, which was supported by the observation that mutations in the BCR-ABL1 gene associated with TKI resistance were observed in CP CML in the CD34+ CD38− (stem) and CD34+ CD38+ (progenitor) cells []. BCR-ABL1 activates Akt signaling that inhibits the forkhead O trans…
Rac	207	AKT1	BCRs	613	BCR	17090304		We investigated the effects of BCR and ABL/BCRs i.) on the activation status of Rho, Rac and cdc42 in GTPase-activation assays; ii.) on the actin cytoskeleton by direct immunofluorescence; and iii) on cell motility by studying migration into a three-dimensional stroma spheroid model, adhesion on an endothelial cell layer under shear stress in a flow chamber model, and chemotaxis and endothelial t…
Rac	207	AKT1	BCR	613	BCR	17090304		We investigated the effects of BCR and ABL/BCRs i.) on the activation status of Rho, Rac and cdc42 in GTPase-activation assays; ii.) on the actin cytoskeleton by direct immunofluorescence; and iii) on cell motility by studying migration into a three-dimensional stroma spheroid model, adhesion on an endothelial cell layer under shear stress in a flow chamber model, and chemotaxis and endothelial t…
Rac	11651	AKT1	BCR	110279	BCR		PMC1637115	Methods We investigated the effects of BCR and ABL/BCRs i.) on the activation status of Rho, Rac and cdc42 in GTPase-activation assays; ii.) on the actin cytoskeleton by direct immunofluorescence; and iii) on cell motility by studying migration into a three-dimensional stroma spheroid model, adhesion on an endothelial cell layer under shear stress in a flow chamber model, and chemotaxis and endot…
Integrin-linked kinase	3611	ILK	brain-derived neurotrophic factor	627	BDNF		PMC3283213	Integrin-linked kinase (ILK)-signaling has been shown to mediate the production of the brain-derived neurotrophic factor by endothelial cells [], and oxidative stress disrupts this signaling pathway [].
ILK	3611	ILK	brain-derived neurotrophic factor	627	BDNF		PMC3283213	Integrin-linked kinase (ILK)-signaling has been shown to mediate the production of the brain-derived neurotrophic factor by endothelial cells [], and oxidative stress disrupts this signaling pathway [].
AKT	207	AKT1	BDNF	497258	BDNF-AS	27717551		BDNF supplementation to sperm freezing or thawing media has protective effects against oxidative stress and apoptosis in frozen-thawed human spermatozoa and could improve sperm function, probably through the activation of AKT.
Akt	207	AKT1	BDNF	497258	BDNF-AS	28110215		Neuroprotective action of N-acetyl serotonin in oxidative stress-induced apoptosis through the activation of both TrkB/CREB/BDNF pathway and Akt/Nrf2/Antioxidant enzyme in neuronal cells.
responsive kinases MAPKAPK2	9261	MAPKAPK2	Beclin 1	8678	BECN1	25693418		The stress-responsive kinases MAPKAPK2/MAPKAPK3 activate starvation-induced autophagy through Beclin 1 phosphorylation.
DNA-PKcs	5591	PRKDC	Bmf	171543	BMF		PMC3017722	Activation of the DNA-PKcs-JNK pathway in RA T cells induces the proapoptotic BH3-only proteins Bim and Bmf Spontaneous upregulation of the DNA-PKcs-JNK pathway in RA T cells indicated continuous DNA repair activity that activates cell-internal stress kinases and jeopardizes T-cell survival.
DNA-PK	5591	PRKDC	BRAT1	231841	BRAT1		PMC4129107	It has been illustrated that BRAT1 regulates activation of ATM and DNA-PK under conditions of DNA damaging stress.
Akt	207	AKT1	CD147	682	BSG		PMC3303482	CyPA is secreted from vascular smooth muscle cells (VSMCs) by a vesicular pathway under oxidative stress and mediates vascular remodeling by promoting inflammation and VSMC proliferation.() Extracellular CyPA binds its receptor CD147 and activates ERK1/2, Akt and JAK, which promotes chemotactic activity towards a variety of immune cells.() CyPA is upregulated in a variety of inflammatory conditio…
Akt	24185	AKT1	CaM	801	CALM3		PMC4171614	The CaM signaling pathway and its function has been well studied in MCF-7 cells, in which CaM regulates Akt activity by its subcellular co-localization and inhibition of CaMK1 enhances oxidative stress-induced apoptosis [, ].
Akt	207	AKT1	CaMKKβ	55984	CAMKK1		PMC4373480	The nitric oxide pathway also contributes to AMPK stimulation of glucose uptake and GLUT4 translocation in heart muscle []. Recently, Horie et al. demonstrated that oxidative stress induces GLUT4 translocation by activation of phosphoinositide 3-kinase (PI3K) and Akt and by dual AMPKK (CaMKKβ and LKB1) activation in cardiac myocytes [].
Akt	207	AKT1	Caprin-1	4076	CAPRIN1	23528710		Here we report that Cyr61 associates with Caprin-1, and confocal microscopy showed that stable ectopic expression of Caprin-1 leads to the formation of stress granules containing Caprin-1 and Cyr61, confers resistance to cisplatin-induced apoptosis, and resulted in constitutive phosphorylation of Akt and ERK1/2.
Rac	207	AKT1	actin	832	CAPZB		PMC4785137	(B) Virus-cell interactions activates Rho-GTPases (Rho, cdc42 and Rac) which potentially regulates actin assembly, filopodia formation, cell polarity, stress fibers, and filopodia associated receptors which assists in virus infection of the host cell.
Rac	11651	AKT1	actin	832	CAPZB		PMC2138040	We conclude that Rac induces rapid actin polymerization in ruffles near the plasma membrane, whereas Rho induces stress fiber assembly primarily by the bundling of actin filaments.
AKT	207	AKT1	caspase 3	12367	CASP3		PMC5017586	Additional experiments further confirmed that inhibition of heat stress induced AKT signaling via PI3K or PI3K/mTOR inhibition significantly enhanced heat stress induced HCC cell killing, caspase 3/7 activity and cleaved caspase 3 generation, suggesting that inhibition of PI3K/mTOR may enhance heat stress induced cell killing by in part increasing apoptosis.
AKT	207	AKT1	caspase 3	12367	CASP3		PMC5017586	Additional experiments further confirmed that inhibition of heat stress induced AKT signaling via PI3K or PI3K/mTOR inhibition significantly enhanced heat stress induced HCC cell killing, caspase 3/7 activity and cleaved caspase 3 generation, suggesting that inhibition of PI3K/mTOR may enhance heat stress induced cell killing by in part increasing apoptosis.
DNA-PKcs	5591	PRKDC	caspase-3	12367	CASP3		PMC3594312	(a) HeLa cells transfected by different doses of small interference RNA against DNA-PKcs (siDNA-PK) and luciferase (siLuc); (b) DNA-PKcs- knockdown cells exposed to heat stress showed higher percentage of chromatin condensation; (c) The knockdown of DNA-PKcs enhanced caspase-3 activation following heat stress independently of HSP70 and HSP40 expression at 24 h post treatment; (d) HSF1 active form…
Akt	207	AKT1	Caveolin-1	857	CAV1	20463056		Caveolin-1 down-regulation suppressed VEGF-stimulated phosphorylation of Akt, JNK, eNOS, c-Src, and FAK; however, basal activities of c-Src and FAK were elevated in parallel with increased stress fiber formation and focal adhesion.
AKT1	817206	KT1	CBL	824872	CBL		PMC4422317	Calmodulin mediates auxin signaling and responds to stresses in Arabidopsis []. CBL interacts with CIPK serine-threonine protein kinases and mediates activation of AKT1 in response to low potassium conditions and stomatal movement [].
AKT1	817206	KT1	AtCBL10	829437	CBL10		PMC4390317	AtCBL10 directly interacts with AKT1 to regulate K+ homeostasis without binding to any CIPKs []. AtCBL1 expression was shown to be induced by drought, cold and wounding [], but not by abscisic acid (ABA) []. Studies with loss-of-function mutant of AtCBL1 supported its role in several abiotic stress responses in an ABA independent manner [, ].
Akt	11651	AKT1	Cer	12404	CBLN1		PMC2992289	Second, activation of macrophages invokes ER stress (), which is one of the up-regulators of autophagy () and might involve SL as intermediaries or modulators (). Third, Cer has been shown to inhibit the activation of the Akt/mammalian target of rapamycin cascade resulting in the induction of autophagy (), and the microarray analysis by the LIPID MAPS Consortium suggests that KLA decreases mammal…
MAPKAP kinase-2	9261	MAPKAPK2	CDC25B	994	CDC25B		PMC5436295	This kinase can be activated by growth factors and stress stimuli, and is involved in cell responses and gene regulation (). CDC25B is a member of the CDC25 phosphatase family and is regulated by the p38 MAPK and/or MAPKAP kinase-2 pathways (,).
Rac	207	AKT1	Cdc42	998	CDC42	9671486		The actin cytoskeleton is regulated by Rho family proteins: in fibroblasts, Rho mediates the formation of actin stress fibers, whereas Rac regulates lamellipodium formation and Cdc42 controls filopodium formation.
Rac	11651	AKT1	Cdc42	998	CDC42		PMC2174243	However, dominant expression of cofilin-S3A had no effect on the Rho-induced stress fiber, Rac-induced lamellipodia, and Cdc42-induced filopodia formations in our system.
Rac	207	AKT1	Cdc42	998	CDC42	12584304		Small t-mediated F-actin rearrangements encompass increased Rac-induced membrane ruffling and lamellipodia, Cdc42-initiated filopodia, and loss of Rho-dependent stress fibers.
Akt	207	AKT1	T-cadherin	12554	CDH13		PMC3629152	Downregulation of T-cadherin gene expression associated with promoter hyper-methylation has been frequently reported in breast, lung and colon carcinomas (). T-cadherin mediates the activation of PI3K/Akt/GSK3β signaling which protects endothelial cells from oxidative stress-induced apoptosis (). T-cadherin downregulation is associated with poorer prognoses in various carcinomas, such as lung, ov…
PKCalpha	5578	PRKCA	VE-cadherin	1003	CDH5	11389203		Thapsigargin induced activation of PKCalpha and discontinuities in VE-cadherin junctions without formation of actin stress fibres.
AKT	207	AKT1	p21	1026	CDKN1A	11034077		These data indicate that the PI3K/AKT signal transduction pathway mediates p21 expression and suggest that this pathway contributes to cell cycle regulation promoted by p53 in response to drug-induced stress.
Rac	11651	AKT1	p21	1026	CDKN1A		PMC3428312	In fibroblasts, RhoA activation promotes the formation of stress fibers, the maturation of focal complexes into focal adhesion and the maintenance of AJs , ; Rac1 activation yields to lamellipodia, dorsal ruffles formation, AJs initiation and formation of focal complexes , .
Akt1	280991	AKT1	p27	12576	CDKN1B		PMC1524731	Regardless, our observation that Akt1 phosphorylates p27S10 in response to cellular stress has important implications for current efforts to understand how PI3K/Akt1 normally regulates p27, as well as how this process is disrupted in human cancers.
ILK	3611	ILK	p16	1029	CDKN2A	26583057		Ectopic overexpression of ILK in cells increased p16 expression, even in the absence of GOx, whereas downregulation of ILK inhibited the increase in p16 due to oxidative stress.
Akt	207	AKT1	cofilin-1	1072	CFL1	20463056		Inhibition of JNK1/2, c-Src, and phosphatidylinositol 3-kinase/Akt suppressed VEGF-induced stress fiber formation and cofilin-1 phosphorylation.
DNA-PKcs	5591	PRKDC	Chk1	1111	CHEK1	24500207		DNA-PKcs is required to maintain stability of Chk1 and Claspin for optimal replication stress response.
DNA-PKcs	5591	PRKDC	-Chk1	1111	CHEK1		PMC3985680	Taken together, our results provide compelling evidence that DNA-PKcs is required for optimal ATR-Chk1 signaling in the cellular response to replication stress.
DNA-PK	5591	PRKDC	Chk2	11200	CHEK2		PMC2373486	Together, these data indicate that Chk2 activation in response to replication stress is dependent on DNA-PK and suggest that activation of this pathway may be a consequence of a failure of ATR/ATM signaling.
Akt2	208	AKT2	CIDEA	1149	CIDEA		PMC3302166	The proteins whose expression was examined either were pro-inflammatory adipokines (apelin, amyloid A, interleukin-1β (IL-1β), IL-6, lipocalin-2, macrophage migration inhibitory factor, monocyte chemoattractant protein 1, osteoprotegerin, soluble phospholipase A2 (sPLA2), regulated on activation, normal T cell expressed and secreted (RANTES), tumor necrosis factor-α), anti-inflammatory adipokines…
AKT1	817206	KT1	AtCIPK23	839907	CIPK23		PMC5465270	For example, AtCBL10 was reported to interact with AtCIPK24 in response to salt stress (Kim et al., ) and was shown to compete with AtCIPK23 for binding to AKT1, thus negatively modulating the activity of AKT (Ren et al., ).
Akt	207	AKT1	clusterin	1191	CLU	19710412		Interestingly, clusterin induced Akt phosphorylation in human RPE cells under oxidative stress, which contributed to cell viability in ARPE-19 cells.
Akt	207	AKT1	clusterin	1191	CLU		PMC5540409	Fig 5 Clusterin activates Akt phosphorylation in retina of RP Studies have shown that activation of Akt by clusterin protects human RPE cells and cardiomyocytes from the oxidative stress, and mesenchymal stem cells against ischemic injury [, , ].
Akt	11651	AKT1	CB2	12802	CNR2		PMC5630296	Our previous studies also suggested that CB2 receptor agonist AM1241 activated PI3K/Akt/Nrf2 signaling to reduce excess oxidative stress, thereby promoting endogenous myocardial regeneration and alleviating myocardial fibrosis in ischemic heart [, ].
AKT	11651	AKT1	CREB-1	1385	CREB1		PMC4056689	CREB-1 can be activated by various cellular kinases including ribosomal protein S6 kinase pp90RSK [], protein kinase C [], AKT/protein kinase B [], mitogen- and stress-activated protein kinase (MSK-1) [], MAPKAP-2 [], and calcium/calmodulin kinases [], subsequently activating CREB in cells.
AKT	207	AKT1	CREB-1	1385	CREB1		PMC4056689	Various serine/threonine kinases, such as ribosomal protein S6 kinase, protein kinase C, protein kinase B/AKT, and mitogen- and stress-activated protein kinase (MSK-1), may activate CREB-1 in cells via phosphorylation [].
Akt	207	AKT1	AMP	403887	CREM		PMC5374364	Genes and Pathways Responsible for the Action The signaling pathways analyzed by DMA are as follows (see Kiyama & Zhu []; Kiyama et al. []): MAPK (such as G protein–coupled receptor (GPCR)/MAPK, MAPK/c-Jun N-terminal kinase (JNK), and NF-κB/MAPK/ERK) and other (such as angiogenesis, ErbB/human epidermal growth factor receptor (HER), nuclear receptor, and ubiquitin/proteasome) signaling pathways, …
Akt	207	AKT1	corticotropin-releasing factor	1392	CRH	25015964		Increased Akt phosphorylation resulted in increased Akt kinase activity and was mediated by corticotropin-releasing factor 2 (CRF2) receptors (astressin-2B sensitive).
Akt	11651	AKT1	mTORC1	382056	CRTC1		PMC4758626	Yet, when responding to stress, mTORC1 is usually activated along with its upstream Akt-Thr308 [].
AKT kinase	11651	AKT1	mTORC2	74343	CRTC2		PMC4279437	Activation of mTORC2 leads to phosphorylation of the AKT kinase at serine 473 resulting in AKT's full activation []. mTOR signaling plays a critical role in the cellular response to various stresses []. mTORC1 regulates growth and cap-dependent mRNA translation via effects on p70S6K and 4E-BP1 and inhibits autophagy [].
Akt	11651	AKT1	TORC2	310615	CRTC2		PMC4510851	These results show that TORC2 is required to maintain Akt protein levels during heat stress, and re-enforce the link between TORC2 and heat stress.
Akt	11651	AKT1	GM-CSF	1437	CSF2		PMC2706607	More specifically, oxidative stress and/or GM-CSF- mediated activation of Akt enhances cell survival of macrophages, neutrophils, and T lymphocytes (; ; ).
AKT	207	AKT1	CK2	13000	CSNK2A2		PMC3785505	For instance, CK2 modulates IκBα protein turnover , , p53 function , , AKT activation and the ER stress/UPR , , , .
Akt	207	AKT1	CT-1	1489	CTF1	11448959		Inhibitors of the p38, ERK, or Akt pathways each partially reduced CT-1-mediated NF-kappa B activation, as well as the cytoprotective effects of CT-1 against hypoxic stress.
Akt	11651	AKT1	CCN2	14219	CTGF		PMC3590365	In conclusion, this study demonstrates that adult cardiac myocytes are direct targets of CCN2, and that CCN2 stimulates the Akt/GSK-3β signaling pathway, with resulting induction of a transcriptome that increases the tolerance of cardiac myocytes towards hypoxia/reoxygenation injury and oxidative stress.
Akt	207	AKT1	SDF-1	6387	CXCL12	12036856		SDF-1 alpha induced transient activation of extracellular stress-regulated kinase (ERK1/2), ribosomal S6 kinase (p90RSK) and Akt, molecules implicated in cell survival.
Akt	207	AKT1	p22phox	1535	CYBA		PMC4414176	These results have raised the possibility that p22phox can activate Akt through an ER stress-dependent pathway in OSCC cells.
Akt	207	AKT1	Nox2	1536	CYBB		PMC4101811	In this study we establish, for the first time, a mechanism by which Nox2-specific oxidative stress impairs autophagy, through Src kinase-dependent activation of the PI3K/Akt/mTOR pathway.
Akt	11651	AKT1	FoxO	172981	daf-16		PMC2908143	Our experiments provide evidence that increased activity of FoxO proteins in response to thermal stress, as well as regulation of FoxO activity by Akt and JNK, were present in the common ancestor of cnidarians and bilaterians.
Akt-1	207	AKT1	CHOP	1649	DDIT3		PMC3326562	Furthermore, siRNA inhibition of either Akt-1 or c-FLIP enhanced α-TEA-induced endoplasmic reticulum stress and endoplasmic reticulum stress-mediated upregulation of JNK/CHOP/DR5, indicating that suppression of prosurvival mediators by TAM + α-TEA may enhance α-TEA-induced endoplasmic reticulum stress-mediated JNK/CHOP/DR5, at least in part, via downregulation of activated Akt, which subsequently…
Akt	207	AKT1	CHOP	1649	DDIT3	16375864		These results indicate that the inactivation of Akt by ER stress induces CHOP expression and causes cell death.
Akt	207	AKT1	CHOP	1649	DDIT3	16375864		PI3K-Akt inactivation induced CHOP expression in endoplasmic reticulum-stressed cells.
AKT	207	AKT1	CHOP	13198	DDIT3		PMC5291222	PI3K/AKT and MAPK/ERK pathway activation is mediated via CHOP and induces ER stress.
Akt	207	AKT1	chop	13198	DDIT3		PMC3203588	Thus, we propose that PI3K/Akt signaling controls cell survival by chop expression through positively mediating uORFchop-mediated translational inhibition during ER stress.
DNA-PK	5591	PRKDC	DEK	540945	DEK		PMC3177200	DEK expression promotes resistance to exogenous stress Upregulated ATM and suppressed DNA-PK signaling upon DEK depletion in cancer cell lines indicated that DEK may regulate DNA damage response and repair pathways.
AKT	11651	AKT1	DPP4	13482	DPP4		PMC3554719	Long term deficiency of DPP4 may modulate inflammatory response in cardiomyocytes, and may contribute to the AKT activation in response to oxidative stress.
Akt	207	AKT1	D2R	1813	DRD2	22975849		These findings led us to examine whether the Akt/GSK-3β pathway was involved in D2R upregulation and oxidative stress elicited by antipsychotics and, in (±)-α-lipoic acid-induced reversal of these phenomena, in SH-SY5Y cells.
Akt1	11651	AKT1	DUOX1	99439	DUOX1		PMC3373226	Sugar analogs other than 2-DG (eg, mannoheptulose and GlcNAc kinase) were previously found to inhibit glucokinase and glucose uptake and decrease growth rate in a number of tumor cell lines; therefore, 2-DG may have a dual action on metabolism by increasing GlcNAc kinase to produce high-energy glycolytic intermediates and by inhibiting GlcNAc, which is phosphorylated by GlcNAc kinase in the regul…
Akt	207	AKT1	ET-1	1906	EDN1		PMC3142065	We hypothesized that the acute ET-1–mediated increase in glucose uptake noted in cultured skeletal muscle would be a result of a transient stress response because ET-1 alone did not increase Akt phosphorylation and thus is unlikely to use an insulin-like signaling cascade.
Akt	207	AKT1	eEF1A	1915	EEF1A1		PMC3944234	Third, the eEF1A protein could be delivered by the eEF1A/Nef/tRNA complexes in the cytoplasm to participate in cytoskeleton rearrangement aimed to eliminate unfolded proteins produced during stress events., , Finally, eEF1A has been reported to activate Akt, the protein kinase B reported by numerous studies to favor resistance to apoptosis.
Akt	207	AKT1	eEF1A	1915	EEF1A1		PMC3358010	Third, the eEF1A protein could be delivered by the eEF1A/Nef/tRNA complexes in the cytoplasm to participate in cytoskeleton rearrangement aimed to eliminate unfolded proteins produced during stress events., , Finally, eEF1A has been reported to activate Akt, the protein kinase B reported by numerous studies to favor resistance to apoptosis.
ILK	3611	ILK	beta3	1934	EEF1B2P2	12372433		We previously showed that integrin-linked kinase (ILK), which can interact with beta1 and beta3 integrins, and its interacting protein, affixin, play an essential role in the initial assembly of focal adhesion structures and actin stress fibers.
Akt	207	AKT1	EGF	1950	EGF		PMC4302666	However, ouabain inhibited EGF-induced activation of the Erk1/2 and Akt signaling pathways as well as p21 Ras activation, prevented EGF-induced formation of actin stress fibers, and inhibited EGF-induced FAK phosphorylation and DAOY cell motility, possibly through activation of stress signaling.
Akt	207	AKT1	EGF	1950	EGF	24967183		EGF may induce the proliferation and migration of human Müller cells through the Akt and the ERK1/2 signal pathways, and induce PI3K-mediated glioprotective effect under oxidative stress.
Akt	207	AKT1	EGF	1950	EGF	25052069		Indeed, ouabain inhibited EGF-induced Erk1/2 and Akt activation and, moreover, prevented EGF-induced formation of actin stress fibers and cell motility, probably by activating a stress signaling response.
Akt	207	AKT1	EGF	1950	EGF		PMC4574528	We recently showed that ouabain inhibits EGF-induced Erk1/2 and Akt activation and prevents EGF-induced formation of actin stress fibers and cell motility in medulloblastoma cells [].
DNA-PK	5591	PRKDC	EGF	25313	EGF		PMC4367244	For instance, EGF receptor has been shown to interact directly with DNA-dependent protein kinase (DNA-PK) and to regulate its activation upon exposure to genotoxic stress ().
Akt	207	AKT1	EGFR	1956	EGFR		PMC4302666	Figure 3 Activation of EGFR in the presence of ouabain induces stress signaling Erk1/2 and Akt signaling are the best characterized targets of the EGF-induced signaling cascade, but EGF regulates many other pathways as well.
AKT	207	AKT1	EGFR	1956	EGFR	19935697		Here, we report a mechanism by which epidermal growth factor receptor (EGFR) differentially modulates the phosphatidylinositol 3'-kinase (PI3K)/AKT pathway in cellular stress conditions.
Akt	207	AKT1	EGFR	1956	EGFR		PMC4182002	The result also found that PAR1/PAR3 receptors activation by MMP-13 is increased by thrombin via a mechanism involving EGFR transactivation and activation of PKCδ, c-Src, PI3K, Akt, and finally AP-1 on the MMP-13 promoter, thereby contributing to cartilage destruction during arthritis []. HO is another inflammatory mediator consisting of three isoforms: HO-1, HO-2, and a less-characterized HO-3 […
AKT	207	AKT1	EGFR	1956	EGFR		PMC5464817	As a direct target of EGFR, AKT phosphorylation is blocked by EGFR inhibition through either AG1478 or EGFR siRNA, and the phosphorylation of AKT regulates oxidative stress and ER stress in DN.
DNA-PK	5591	PRKDC	EGFR	1956	EGFR		PMC2361115	Upon DNA damage and oxidative/heat stress, EGFR enters the cell nucleus and interacts with DNA-PK, leading to DNA repair and radioresistance.
Akt	11651	AKT1	PERK	9451	EIF2AK3		PMC4100805	Remarkably, the same upstream CaMKII-p38ɑ pathway described above gives rise to another branch that activates the PERK branch of the ER stress pathway []. PERK activation leads to induction of the Akt inhibitor, Trb3, which suppresses insulin receptor signaling.
AKT	207	AKT1	PERK	9451	EIF2AK3	25761777		PERK silencing results in decreased glioma cell viability and ATP/lactate production upon low glucose stress, which is mediated by partially blocked AKT activation and subsequent inhibition of Hexokinase II (HK2)'s mitochondria translocation.
AKT	11651	AKT1	PERK	9451	EIF2AK3		PMC4356960	Our data suggested that AKT pathway activated by PERK under stress conditions may act as a modulator to alleviate the cellular stress level by initiating some protective behaviors such as glycolysis.
Akt	207	AKT1	PERK	9451	EIF2AK3	22493067		The endoplasmic reticulum (ER) resident PKR-like kinase (PERK) is necessary for Akt activation in response to ER stress.
Akt	207	AKT1	PERK	9451	EIF2AK3		PMC2642534	A striking finding is that ER stress-mediated activation of Akt is completely dependent on PERK.
Akt	207	AKT1	PERK	9451	EIF2AK3	19029953		Furthermore, we demonstrate that the activation of the PI3K-Akt pathway by ER stress is dependent on PERK, suggesting additional ways in which PERK activity protects cells from ER stress-induced apoptosis.
MAPKAPK2	9261	MAPKAPK2	mRNA-stabilizing factor HuR	363854	ELAVL1		PMC2946579	Under oxidative stress conditions, P38 MAP kinase activates MAPKAPK2, which promotes translocation of mRNA-stabilizing factor HuR from the nucleus to the cytoplasmic compartment, where it stabilizes γ-GCSh mRNA by binding to the AU-rich motif located at the 3′ untranslated region.
Akt	207	AKT1	EPO	2056	EPO	22711436		However, rHuEPO inhibited CP-induced AKI by a possible mechanism involving PI3K/Akt activation and the inhibition of ER stress-mediated apoptosis.
Akt	11651	AKT1	EPO	2056	EPO		PMC3472733	In retinal cells, EPO is cytoprotective against the stress of glyoxal-advanced glycation end products (AGEs) through activation of Akt [] and EPO may rely upon Akt during retinal detachment [].
Akt	207	AKT1	erythropoietin	13856	EPO		PMC4036665	The PI3K/Akt survival pathway has also been shown to be activated by pretreatment with erythropoietin against doxorubicin-impaired heart function and cardiomyocyte apoptosis and oxidative stress [].
Akt	207	AKT1	erythropoietin	2056	EPO		PMC4705567	Human and animal model have shown that erythropoietin (EPO) acts as an anti-apoptotic, neuroprotective, anti-inflammatory, angiogenesis and stabilization of neurovascular function, and reduces oxidative stress by stimulating cell survival pathway (PI3k/Akt pathway).
Akt	207	AKT1	EPO	2056	EPO		PMC4705567	Human and animal model have shown that erythropoietin (EPO) acts as an anti-apoptotic, neuroprotective, anti-inflammatory, angiogenesis and stabilization of neurovascular function, and reduces oxidative stress by stimulating cell survival pathway (PI3k/Akt pathway).
Akt1	207	AKT1	ERAs	3266	ERAS	25660617		However, whole transcript expression profiling showed partly different effects of the ERAs on doxorubicin-modulated cardiac gene expression of genes involved in signal transduction (e.g. Stat3, Pim1, Akt1, Plcb2), fibrosis (e.g. Myl4), energy production (e.g. Ant1) or oxidative stress (e.g. Aox1).
Akt	11651	AKT1	IRE1	2081	ERN1		PMC4575108	We showed that the bufalin-induced inactivation of Akt at least partly depended on ER stress and was mediated by the IRE1 pathway.
mitogen-activated protein kinase 8	540207	ILK	endoplasmic reticulum to nucleus signaling 1	2081	ERN1		PMC4590596	Abbreviations 3-MA 3-methyladenine AMPK AMP-activated protein kinase ATF6 activating transcription factor 6 Baf A1 bafilomycin A1 CAMKK2 calcium/calmodulin-dependent protein kinase kinase 2: β EIF2AK3/PERK eukaryotic translation initiation factor 2-α kinase 3 ER endoplasmic reticulum ERN1/IRE1 endoplasmic reticulum to nucleus signaling 1 HSF1 heat shock transcription factor 1 HSPA5 heat shock 70k…
DNA repair proteins DNA-PKcs	5591	PRKDC	IRE1α	2081	ERN1	23001845		IRE1α and ATF4, as the important ER stress molecules, could inhibit the expression of DNA repair proteins DNA-PKcs, XRCC1, and HSP70 under heat shock.
IKK	35329	TBK1	IRE1α	174305	ERN1		PMC3924831	Under ER stress, IRE1α activates the JNK-AP1 pathway and the IκB kinase (IKK)-NFκB pathway as well as the splicing of XBP1.
MK2	9261	MAPKAPK2	ER81	2115	ETV1	11551945		Altogether, MK2 may regulate ER81 transcriptional activity in a cell type-specific manner and thereby modulate various physiological processes beyond stress responses.
AKT	207	AKT1	miR-223	100038363	F630028O10Rik		PMC5209603	Specifically, overexpression of miR-223 and miR-153 inhibited stretch stress-enhanced VSMCs proliferation via activation of the insulin-like growth factor-1 receptor and PI3K-AKT signaling pathway [].
DNA-PK	5591	PRKDC	FBH1	84893	FBXO18		PMC3549964	S1 shows additional data illustrating that FBH1 promotes the activation of ATM and DNA-PK and the phosphorylation of RPA2 on Ser4 and Ser8 after DNA replication stress induced by HU treatment.
DNA-PK	5591	PRKDC	FBH1	50755	FBXO18		PMC3549964	Finally, as shown by clonogenic survival assays, FBH1-depleted cells were less sensitive to UV irradiation (). FBH1 is required for the efficient activation of ATM and DNA-PK after DNA replication stress induced by UV.
Akt	207	AKT1	FGF-1	2246	FGF1	19713443		Fibroblast growth factor-1 (FGF-1) is released from astrocytes in stress and stimulates MEK/ERK and PI3K/Akt pathways in autocrine fashion to increase synthesis of cholesterol and 25-OH-cholesterol, and to induce transport and secretion of apoE, respectively.
Akt	207	AKT1	Fibroblast growth factor-1	2246	FGF1	19713443		Fibroblast growth factor-1 (FGF-1) is released from astrocytes in stress and stimulates MEK/ERK and PI3K/Akt pathways in autocrine fashion to increase synthesis of cholesterol and 25-OH-cholesterol, and to induce transport and secretion of apoE, respectively.
Akt	207	AKT1	FGF-10	2255	FGF10		PMC4728497	In our study, we found that FGF-10 activated Akt signaling pathway, which seemed to be able to result in an enhanced NF-κB activity under ischemic stress.
Akt	207	AKT1	bFGF	2247	FGF2	22609091		bFGF inhibits ER stress induced by ischemic oxidative injury via activation of the PI3K/Akt and ERK1/2 pathways.
Akt	207	AKT1	FGF-2	2247	FGF2	19359387		Treatment with FGF-2 (30 ng/ml; 10 min) activated phosphorylation of signal transducer and activator of transcription-3, ERK, stress-activated protein kinase/c-Jun N-terminal kinase, Akt, and focal adhesion kinase.
AKT	207	AKT1	Fibroblast growth factor 2	2247	FGF2	28885691		Fibroblast growth factor 2 induces proliferation and distribution of G2 /M phase of bovine endometrial cells involving activation of PI3K/AKT and MAPK cell signaling and prevention of effects of ER stress.
Akt	207	AKT1	bFGF	2247	FGF2		PMC4369816	Taken together, these results suggest that the protective role of bFGF in I/R injury is related to the inhibition of ER stress and mitochondrial dysfunction through the activation of the PI3K/Akt and ERK1/2 signalling pathways.
Akt	207	AKT1	bFGF	2247	FGF2		PMC4369816	bFGF inhibits ER stress and mitochondrial dysfunction-related protein expression via activation of the PI3K/Akt and ERK1/2 pathways.
Akt	207	AKT1	FGF2	2247	FGF2		PMC5007350	Zinc could induce the release of FGF2 through the activation of the myeloid zinc-finger 1 (MZF-1), a transcription factor present in astrocytes []. FGF2 is involved in the suppression of endoplasmic reticulum stress in ischemic oxidative damage models through the activation of PI3K/Akt and ERK1/2 pathways [].
Akt1	207	AKT1	FGF21	26291	FGF21	27184848		The induction of FGF21 in Cpt1b-deficient muscle is dependent on AMPK and Akt1 signaling but independent of the stress signaling pathways.
Akt	207	AKT1	KGF	2252	FGF7	12732722		KGF-induced Akt activation may play an important role in inhibiting lung alveolar cell death thereby preserving the lung architecture and function during oxidative stress.
AKT	207	AKT1	Fig 4	103199	FIG4		PMC5017586	Fig 4 Sublethal heat stress induces PI3K/mTOR and MEK-dependent AKT and ERK signaling, respectively, and inhibition of the PI3K-AKT-mTOR pathway but not MEK enhances heat stress induced HCC cell killing Next we sought to investigate the upstream mechanisms mediating heat stress induced AKT and ERK signaling.
AKT	207	AKT1	actin	2318	FLNC		PMC3634053	The significant signaling pathways identified included those involved in apoptosis, cell cycle regulation, nuclear receptor signaling, and xenobiotic metabolism (aryl hydrocarbon receptor signaling), cancer (polyamine regulation in colon cancer and phosphoinositide 3-kinase (PI3K)/protein kinase B (AKT) signaling), cardiovascular signaling (intrinsic prothrombin activation pathway), cellular grow…
Akt	207	AKT1	fox O	41709	foxo		PMC3928625	Subsequently, Akt inhibits by phosphorylation the nuclear translocation of the transcription factor Forkhead fox O (FOXO); FOXO regulates metabolism, growth, energy homeostasis, stress responses, life span and senescence (for references see Puig and Mattila, ).
Akt	207	AKT1	FOXO	41709	foxo		PMC3928625	Subsequently, Akt inhibits by phosphorylation the nuclear translocation of the transcription factor Forkhead fox O (FOXO); FOXO regulates metabolism, growth, energy homeostasis, stress responses, life span and senescence (for references see Puig and Mattila, ).
AKT	207	AKT1	FoxO	41709	foxo		PMC4499569	In the process, the activated AKT interacts with several mediators like JNK, FoxO, GSK3β, etc., thereby to render neuroprotection by limiting apoptosis, preventing microglia activation and neuroinflammation, preventing ROS accumulation and by keeping oxidative stress levels under check.
Akt	11651	AKT1	FOXO	41709	foxo		PMC4666839	The ability of PERK to directly regulate FOXO and potentially override negative regulation by Akt supports a model wherein the UPR and ER stress have the capacity to finely tune signal output downstream of Akt.
Akt	207	AKT1	FoxO1	2308	FOXO1	24415347		We concluded that liraglutide markedly improved beta cell function under lipid stress and that the protective action of liraglutide was mediated by activation of PI3K/Akt, which resulted in inactivation of FoxO1 along with the down-regulation of p27, Bax, Cidea and up-regulation of Pdx-1, MafA, and NeuroD expressions.
Akt	11651	AKT1	FoxO1	2308	FOXO1		PMC2910502	Collectively, these results, although do not rule out the possibility that KRIT1 may control FoxO1 expression through an indirect modulation of SirT1 function, support the interpretation that KRIT1, by preventing the Akt-mediated inactivation and downregulation of FoxO1, may favor the SirT1/FoxO1 interaction, which, in turn, could promote the shifting of FoxO1 functions towards resistance to oxid…
Akt	11651	AKT1	FoxO1	2308	FOXO1		PMC2910502	Collectively, these results, although do not rule out the possibility that KRIT1 may control FoxO1 expression through an indirect modulation of SirT1 function, support the interpretation that KRIT1, by preventing the Akt-mediated inactivation and downregulation of FoxO1, may favor the SirT1/FoxO1 interaction, which, in turn, could promote the shifting of FoxO1 functions towards resistance to oxid…
Akt	11651	AKT1	FOXO1	56458	FOXO1		PMC3424190	Growth factor stimulates activation of the PI3K pathway as well as mTORC2; both eventually activate Akt, which can inhibit stress signaling and apoptosis through inactivation of FOXO1/O3 transcription factors.
Akt	207	AKT1	FoxO3a	2309	FOXO3	24289330		FoxO3a is post-translationally regulated, negatively by PI3K/Akt and MAPK/Erk and positively by oxidative stress/JNK pathways.
PKB	207	AKT1	Foxo3a	2309	FOXO3	17108112		Conversely, treatment of Ba/F3 cells with H(2)O(2) caused an increase of Foxo3a on both transcriptional and protein levels, suggesting that deregulated PKB activation leads to oxidative stress resulting in Foxo3a up-regulation and subsequently cell death.
PKB	207	AKT1	Foxo3a	2309	FOXO3	17108112		Chronic protein kinase B (PKB/c-akt) activation leads to apoptosis induced by oxidative stress-mediated Foxo3a transcriptional up-regulation.
Akt	11651	AKT1	proapoptotic forkhead box class O transcription factor Foxo3a	2309	FOXO3		PMC5526875	Mechanisms involved in the neuroprotective effect of lithium include direct or Akt-mediated inhibition of glycogen synthase kinase GSK-3β, Akt-mediated inhibition of the proapoptotic forkhead box class O transcription factor Foxo3a and murine double minute (MDM), stimulation of production and activity of neuroprotective brain derived neurotrophic factor BDNF, up-regulation of antiapoptotic protei…
Akt	11651	AKT1	FOXO3a	2309	FOXO3		PMC5602670	However, since different levels of FOXO3a were detected in FCs from different oocyte competence groups, we propose that the Akt-FOXO3a interaction functions to adjust the regulation of the oxidative stress response and cell proliferation and leads to apoptosis by either favoring or preventing the acquisition of competence.
Akt	207	AKT1	FoxO3	2309	FOXO3		PMC4635427	To elucidate the potential mechanisms of FoxO3 trafficking in response to oxidative stress, we examined whether PI3K/Akt or p38/MAPK are involved in hypoxia-dependent FoxO3 nuclear translocation.
Akt	207	AKT1	FoxO3a	2309	FOXO3		PMC3583470	Furthermore, because Akt activity prevents the induction of apoptosis by cytokines, growth factors, and cellular stress (), we determined the effect of the Akt pathway on FoxO3a activation, TRAIL expression, and apoptosis.
Akt	11651	AKT1	FOXO3a	2309	FOXO3		PMC3805328	Figure 5 JNK has been implicated in the activation of FOXO3a under sustained oxidative stress in antagonism to Akt.
AKT	11651	AKT1	FOXO3	2309	FOXO3		PMC5389038	Davila et al. found that full activation of FOXO3 in response to oxidative stress in neurons involves inhibition of AKT, followed by activation of FOXO3 by JNK2 [].
AKT	207	AKT1	FSH	14308	FSHB		PMC4237239	Previous studies indicated that FoxO1, the major downstream effector of PI3K/AKT, is phosphorylated following exposure to FSH in granulosa cells.,, In this study, it was found that both PKA and PI3K/AKT were activated by FSH in MGCs of DFs to inhibit the expression of FoxO1 following stress-triggered apoptosis ().
Akt	207	AKT1	Gab1	2549	GAB1	16284184		Overexpression of a Gab1 mutant lacking the pleckstrin homology domain abrogated the shear stress-induced phosphorylation of Akt but failed to affect the phosphorylation or activity of eNOS.
Akt	207	AKT1	Gab1	2549	GAB1	24951957		Furthermore, we found that the phosphorylation of Gab1 and Gab1-mediated activation of Akt and MAPK by oxidative stress was suppressed by ErbB receptor and Src kinase inhibitors, accompanied by an increase in apoptotic cell death.
Akt	207	AKT1	Nrf2	2551	GABPA		PMC5100993	Under the stressed condition, the activated form of Akt, i.e. phosphorylated Akt, induces the activated form Nrf2.
Akt	207	AKT1	Nrf2	2551	GABPA	18424257		These findings suggest that Nrf2 mediates EGCG-induced expression of some representative antioxidant enzymes, possibly via Akt and ERK1/2 signaling, which may provide the cells with acquired antioxidant defense capacity to survive the oxidative stress.
Akt	207	AKT1	Nrf-2	2551	GABPA		PMC4658134	Fig 5 Studies in mammalian systems have indicated that the transcription factor nuclear factor erythroid-derived 2-like 2 (Nrf-2) can be activated via the hyperactivation of the PI3-kinase/Akt signalling cassette to regulate genes involved in oxidative stress response [].
Akt	207	AKT1	Nrf2	2551	GABPA		PMC3984961	In addition, Nrf2 modulates the apoptosis and autophagy related signaling []. Nrf2 signaling is activated by the PI3K/Akt pathway and the ERK pathway to promote the expression of antioxidant genes during oxidative stress [, , , , ].
AKT	207	AKT1	NRF2	2551	GABPA		PMC3755003	PCN activates the EGFR-PI3K-AKT/MEK1/2-ERK1/2 MAP kinase signaling pathway that positively regulates NRF2 during oxidative stress.
Akt	207	AKT1	Nrf2	2551	GABPA		PMC5421141	In addition, Danshensu (1 and 10 µM) [] and the extract of S. miltiorrhiza (29.76 or 59.52 mg/kg for 5 days by gavage) [] treatment contributed to the recovery of cardiac function after MI, and the tolerance of heart against MI injury by improving coronary flow, heart rate and left ventricular developed pressure, and the recovery of ± dp/dtmax as well as reducing infarct sizes via inhibiting oxid…
Akt	207	AKT1	Nrf2	2551	GABPA		PMC3833998	PI3K/Akt mediated Nrf2 activation is a well-documented pathway involved in protection against cytotoxicity, including endothelial cell oxidative stress , .
Akt	207	AKT1	Nrf2	2551	GABPA		PMC5488237	The induction of HO-1 under oxidative stress is mainly activated by the transcription factor nuclear factor erythroid 2-related factor 2 (Nrf2), which is regulated by the mitogen-activated protein kinase (MAPK), phosphoinositide 3-kinase (PI3k)/Akt, and protein kinase C (PKC) signaling pathways [–].
Akt	207	AKT1	GLP-2	2641	GCG	26954146		The purpose of this research was to determine the protective effect of GLP-2 mediated TJ and transepithelial electrical resistance (TER) in lipopolysaccharide (LPS) stressed IPEC-J2 cells and to test the hypothesis that GLP-2 regulate TJ and TER through the phosphatidylinositol 3-kinase (PI3K)-protein kinase B (Akt)-mammalian target of rapamycin (mTOR) signaling pathway in IPEC-J2 cells.
Akt	207	AKT1	glucagon	2641	GCG	29117537		Taken together, EGCG prevented αTC1-6 cells from H2O2 induced oxidative stress, restored dysfunction of glucagon secretion and inhibited cell apoptosis via the activation of Akt signaling and suppression of P38 and JNK pathway.
Akt	207	AKT1	obestatin	51738	GHRL	28744974		Thus, we suggested that obestatin-induced activation of PI3K/Akt/NO and PKG signalling is implicated in protection of the myocardium when challenged by adrenergic, endothelinergic or I/R stress.
Akt	207	AKT1	GLP-2	93896	GLP2R		PMC4852237	The purpose of this research was to determine the protective effect of GLP-2 mediated TJ and transepithelial electrical resistance (TER) in lipopolysaccharide (LPS) stressed IPEC-J2 cells and to test the hypothesis that GLP-2 regulate TJ and TER through the phosphatidylinositol 3-kinase (PI3K)-protein kinase B (Akt)-mammalian target of rapamycin (mTOR) signaling pathway in IPEC-J2 cells.
Akt	207	AKT1	Grx-1	2745	GLRX		PMC3327713	As such, our current study suggested that Grx-1 reduced oxidative stress resulting in activation of the Akt pathway thereby up-regulating the expression of both VEGF and Ang-1 which subsequently leading to enhanced angiogenesis and neovascularization.
Akt	11651	AKT1	Grx-1	2745	GLRX		PMC3327713	Grx-1 overexpression increases phosphorylation of Akt after MI The expression of p-Akt (), measured 8 h after coronary ligation significantly increased in the Grx-1Tg/+MI group as compared to the WTMI group, indicating the mechanism of action Grx-1 during ischemic stress probably through Akt signaling pathway.
PKCalpha	5578	PRKCA	AMF	2821	GPI	11089878		However, AMF induced robust translocation of PKCalpha to the stress fibers and cortical actin suggesting a critical role for this kinase in the generation of the motility signal.
mitogen activated protein kinase	3611	ILK	Grb10	2887	GRB10		PMC4904989	Abbreviations 4E-BP1 4E-binding protein 1 5′TOP 5′ terminal oligopyrimidine AMPK AMP-activated protein kinase ATF4 activating transcription factor 4 ATF6 activating transcription factor 6 ATG autophagy regulated protein ATM ataxia telangiectasia mutated CAD carbamoyl-phosphate synthetase 2, aspartate transcarbamylase, and dihydroorotase CaMKKbeta calmodulin-dependent protein kinase kinase β CMA c…
Akt	207	AKT1	PGRN	2896	GRN	21820214		Here we show that extracellular PGRN stimulates phosphorylation/activation of the neuronal MEK/extracellular regulated kinase (ERK)/p90 ribosomal S6 kinase (p90RSK) and phosphatidylinositol-3 kinase (PI3K)/Akt cell survival pathways and rescues cortical neurons from cell death induced by glutamate or oxidative stress.
Akt	207	AKT1	PGRN	2896	GRN	24703938		In addition, the 2nd and 3rd cysteine-rich domains (CRD) in the extracellular portion of TNFR2 (CRD2CRD3), known to directly bind to PGRN, disturbed the interaction of PGRN with TNFR2, and in turn abolished PGRN-mediated activation of Erk1/2 and Akt signaling and protection against apoptosis in response to ER-stress.
Akt	207	AKT1	glycogen synthase kinase-3β	2931	GSK3A	26541785		Compared with 1° Reperfusion, 1° Unloading reduced LV wall stress and increased myocardial levels of SDF-1α, CXCR4, and phosphorylated Akt, extracellular regulated kinase, and glycogen synthase kinase-3β in the infarct zone.
Akt	207	AKT1	GSK-3beta	2932	GSK3B	18387957		We further demonstrated that oxidative stress induced by hydrogen peroxide (H2O2) dephosphorylates Akt and GSK-3beta, increases GSK-3beta activity, and promotes an interaction with beta-catenin and its degradation.
Akt	11651	AKT1	glycogen synthase kinase GSK-3β	2932	GSK3B		PMC5526875	Mechanisms involved in the neuroprotective effect of lithium include direct or Akt-mediated inhibition of glycogen synthase kinase GSK-3β, Akt-mediated inhibition of the proapoptotic forkhead box class O transcription factor Foxo3a and murine double minute (MDM), stimulation of production and activity of neuroprotective brain derived neurotrophic factor BDNF, up-regulation of antiapoptotic protei…
Akt	207	AKT1	GSK-3beta	2932	GSK3B	15623487		Immunohistochemistry and western blots using antibodies against AP, Ki-67, phospho-protein kinase B (Akt), phospho-p44/42 mitogen activated protein kinase/extracellular signal regulated kinase 1/2 (MAPK/Erk1/2), phospho-glycogen synthase kinase-3beta (GSK-3beta), phospho-stress activated protein kinase/c-Jun N-terminal kinase, total-Akt, total-GSK-3beta, and phospho-p38-MAPK were carried out on i…
Akt	207	AKT1	GSK-3beta	2932	GSK3B	15623487		Immunohistochemistry and western blots using antibodies against AP, Ki-67, phospho-protein kinase B (Akt), phospho-p44/42 mitogen activated protein kinase/extracellular signal regulated kinase 1/2 (MAPK/Erk1/2), phospho-glycogen synthase kinase-3beta (GSK-3beta), phospho-stress activated protein kinase/c-Jun N-terminal kinase, total-Akt, total-GSK-3beta, and phospho-p38-MAPK were carried out on i…
AKT	207	AKT1	GSK3β	56637	GSK3B		PMC4499569	In the process, the activated AKT interacts with several mediators like JNK, FoxO, GSK3β, etc., thereby to render neuroprotection by limiting apoptosis, preventing microglia activation and neuroinflammation, preventing ROS accumulation and by keeping oxidative stress levels under check.
Akt	24185	AKT1	GSK-3β	56637	GSK3B		PMC5347164	Both the activation of Akt and phosphorylation of GSK-3β by Myr in turn regulate Nrf2 signaling to attenuate oxidative stress in DCM.
RAC	207	AKT1	Gelsolin	535077	GSN		PMC4298738	Gelsolin is a downstream effector of RAC that regulates organization of actin filaments and gelsolin knockdown induces RAC overexpression and increases amounts of F-actin in stress fibers and lamellipodia.
MK2	9261	MAPKAPK2	GSTT1	14871	GSTT1		PMC3273902	In conclusion, this study demonstrates that oxidative stress-induced upregulation of GSTT1 is mediated through the p38-MK2 signaling pathway.
MK2	9261	MAPKAPK2	GSTT1	2952	GSTT1	22207314		GSTT1 is upregulated by oxidative stress through p38-MK2 signaling pathway in human granulosa cells: possible association with mitochondrial activity.
DNA-PKcs	5591	PRKDC	H2AX	3014	H2AFX		PMC1919366	In contrast, DNA-PKcs was shown to mediate H2AX phosphorylation in hypertonically-stressed cells [], as well as in response to DNA fragmentation during apoptosis []. DNA fragmentation in apoptotic cells was also seen to be accompanied by activation of ATM, which would suggest that ATM may mediate H2AX phosphorylation during apoptosis as well [,].
Akt	24185	AKT1	orexin	25723	HCRT		PMC3929148	5 Discussion In the present work, we focused on the effect of orexins on Akt kinase stimulation in primary rat neuronal cultures and the significance of the orexin-induced Akt activation in neurons subjected to hypoxic stress.
Akt	207	AKT1	HDAC	9734	HDAC9		PMC3794942	A recent study indicated that HDAC inhibitors induced autophagy through the downregulation of Akt/mTOR signaling and the induction of the ER stress response in hepatocellular carcinoma cells .
Akt	207	AKT1	HDAC	9734	HDAC9		PMC3840459	Induction of autophagic cell death by HDAC inhibitors has clear clinical implications in treating cancers with apoptotic defects []. HDAC inhibitor (SAHA) induced autophagy in cancer cells through inhibition of Akt/mTOR pathway and induction of ER stress response.
AKT	207	AKT1	HIF1alpha	3091	HIF1A	18832389		An upregulation of hypoxia-inducible factor 1alpha (HIF1alpha) and downstream targets followed by ER stress induction was also observed in Pten mutant growth plates and in cultured chondrocytes, suggesting that PI3K/AKT signaling modulates chondrocytic adaptation to hypoxic stress via regulation of the HIF1alpha pathway.
AKT	207	AKT1	HIF-1	3091	HIF1A		PMC5618503	The aberrant activation of PI3K-AKT-mTOR signaling induces the overexpression of HIF-1 in cancer [], and the dual PI3K/mTOR inhibitor, NVP-BEZ235, suppresses hypoxia-induced HIF-1 expression and enhances apoptosis of cancer cells under hypoxic stress [].
Akt	207	AKT1	HIF-1	3091	HIF1A	22424098		Collectively, our results demonstrate that PI3K/Akt contributes to hypoxic stress-induced TLR4 expression at least partly through the regulation of HIF-1 activation.
AKT	207	AKT1	HIF1α	3091	HIF1A		PMC4673253	We also found that ovarian cancers with high mRNA LEP/LEPR levels exhibit multiple protein changes (either in level of expression or phosphorylation status) involving different signaling pathways, some of which are directly related to the response to cytokines, growth factors and hypoxia stimuli (e.g., JAK, STAT3, HIF1α, SNX), cell cycle regulation, cell growth and differentiation, the stress res…
Pkc1	48311	PRKCA	H3	8290	HIST3H3		PMC5618247	Under conditions of replicative stress, Pkc1 appears responsible for H3 T46 phosphorylation and Pkc1, by reportedly phosphorylating Thr46 (by coincidence at the same residue number) in the histone acetyltransferase Rtt109, also stimulates acetylation of H3 K57 [].
Pkc1	48311	PRKCA	H3	8290	HIST3H3		PMC5618247	Under conditions of replicative stress, Pkc1 appears responsible for H3 T46 phosphorylation and Pkc1, by reportedly phosphorylating Thr46 (by coincidence at the same residue number) in the histone acetyltransferase Rtt109, also stimulates acetylation of H3 K57 [].
Akt	11651	AKT1	HK-II	3099	HK2		PMC3745326	Thus, Akt appears to positively regulate HK-II binding to mitochondria by direct phosphorylation of HK-II and indirect mechanisms via inhibition of GSK3β (, ) to preserve mitochondrial integrity against cellular stress.
Akt	24185	AKT1	HO-1	24451	HMOX1		PMC5401460	Several studies reported that HO-1 provided protection against various forms of stress through the activation of the PI3K/Akt or ERK1/2 signaling pathways [, ].
Akt	207	AKT1	ER-dependent HO-1	3162	HMOX1	18845176		Taken together, these results suggest that puerarin augments cellular antioxidant defense capacity through ER-dependent HO-1 induction via the Gbeta1/PI3K/Akt-Nrf2 signaling pathway, thereby protecting cells from oxidative stress.
Akt	207	AKT1	heme oxygenase-1	3162	HMOX1	16309568		Since activation of heme oxygenase-1 and PI3K/Akt both protect the cellular environment, we postulated that PI3K/Akt can regulate the induction of heme oxygenase-1 by proinflammatory stress.
Akt	11651	AKT1	HO-1	15368	HMOX1		PMC5362435	Furthermore, PI3K/Akt signaling pathway is commonly involved in HO-1 expression and in Nrf2-dependent transcription in diverse cell types in response to oxidative stress and different stimuli [, , , ].
Akt	207	AKT1	HO-1	3162	HMOX1		PMC4786624	Previously, it has been reported that HO-1 induction through the PI3K/Akt/Nrf2 signaling pathway is associated with protection against oxidative stress., In murine cerebral endothelium, inhibition of NF-κB and COX2 by CoPP, a HO-1 inducing compound, suggests protective functions of HO-1.
Akt	207	AKT1	HO-1	3162	HMOX1	27923643		The present results showed that, at low concentrations, pretreatment with BME triggered stress response by causing ROS production, then, activated survival-promoting signals via ERK and Akt activated Nrf2/HO-1 signaling pathway, resulting in decrease in cytotoxicity induced by the OGD.
Akt	207	AKT1	HO-1	3162	HMOX1		PMC5455005	Compounds Conferring Neuroprotection via the Nrf/HO-1 Pathway The Nrf2/HO-1 pathway is one of the important pathways protecting against oxidative stress in the body; wherein Nrf2, the most well-known antioxidant response element (ARE)-associated transcription factor, enters the cell nucleus on activation and binds to AREs to initiate transcription [], inducing the production of downstream antioxi…
Akt	207	AKT1	downstream HO-1 protein	24451	HMOX1		PMC5455005	Effect of 1T3O on 6-OHDA-Induced Changes in Proteins Related to the Akt/Nrf2 Signaling Pathway of SH-SY5Y Neuroblastomas Studies have shown that Akt participates in regulating Nrf2 nuclear translocation and affects the expression of the downstream HO-1 protein, an important antioxidative stress protein.
Akt	207	AKT1	ER-dependent HO-1	3162	HMOX1	19781563		Taken together, these results suggest that Rb1 augments the cellular antioxidant defenses through ER-dependent HO-1 induction via the Gbeta1/PI3K/Akt-Nrf2 signaling pathway, thereby protecting cells from oxidative stress.
Akt	207	AKT1	HO-1	3162	HMOX1	27885462		These results suggest that ECQ exerts a cytoprotective effect against H2O2-induced oxidative stress by upregulation of Nrf2/HO-1 via the PI3 K/Akt pathway.
Akt	207	AKT1	HO-1	3162	HMOX1	23261939		Akt and ERK are involved in HO-1 induction after oxidative stress.
Akt	207	AKT1	HO-1 gene	3162	HMOX1		PMC3640395	In vascular and endothelial cells when confronted with oxidative stress, hemodynamic stress and nitric oxide, the induction of the HO-1 gene is mainly regulated by the activation of the transcription factor nuclear factor erythroid 2-related factor 2 (Nrf-2), PI3k/Akt and the MAPK/ERK pathway [,,].
AKT	207	AKT1	HO-1	3162	HMOX1	28694916		Moreover, IAA treatment protected hDPSCs against H2O2-induced oxidative stress via increased expression of Nrf2 and HO-1, mediated by the AKT pathway.
AKT1	207	AKT1	HO-1	3162	HMOX1		PMC3672203	ERK1/2 and AKT1 signaling pathways have been proven to upregulate the expression of antioxidant proteins Cu/Zn-SOD, Mn-SOD, HO-1 and HSP70 in oxidative stress –.
Akt	207	AKT1	HO-1 gene	3162	HMOX1		PMC3630723	Stimulation of PI3K/Akt by nerve growth factor and haemin in dopaminergic neuronal cells enhanced HO-1 gene expression in an Nrf2-dependent fashion and provided protection against oxidative stress[].
AKT	207	AKT1	HO-1	3162	HMOX1		PMC5488230	In conclusion, we demonstrated that IAA treatment protected hDPSCs against H2O2-induced oxidative stress via increased expression of Nrf2 and HO-1, mediated by the AKT pathway ().
AKT	207	AKT1	HO-1	3162	HMOX1		PMC4742076	AKT not only promotes cell survival, but also modulates Nrf2 as an upstream signaling molecule, and activates HO-1 to protect against oxidative stress [, ].
mitogen activated protein kinase	3611	ILK	heterogeneous nuclear ribonucleoprotein A1	3178	HNRNPA1		PMC4904989	Abbreviations 4E-BP1 4E-binding protein 1 5′TOP 5′ terminal oligopyrimidine AMPK AMP-activated protein kinase ATF4 activating transcription factor 4 ATF6 activating transcription factor 6 ATG autophagy regulated protein ATM ataxia telangiectasia mutated CAD carbamoyl-phosphate synthetase 2, aspartate transcarbamylase, and dihydroorotase CaMKKbeta calmodulin-dependent protein kinase kinase β CMA c…
Akt1-gene	207	AKT1	RNPA2	3181	HNRNPA2B1	20719961		Mitochondrial respiratory stress also activates Akt1-gene expression, which involves hnRNPA2 as a coactivator, indicating a complex interdependency of these two factors.
Akt1	280991	AKT1	hnRNPA2	3181	HNRNPA2B1		PMC5148442	Chromatin immunoprecipitation (ChIP) analysis shows that association of hnRNPA2 with the stress-target gene promoters cathepsin L, RyR1 and Akt1 was markedly increased in PmtDNA-depl cells, which was reduced by ~80% in reverted cells (; ).
Akt	207	AKT1	HDL	3290	HSD11B1	29244772		Examination of macrophages in culture revealed that the sphingosine-1-phosphate receptor 1 selective agonist, SEW2871 or high density lipoprotein (HDL), protected macrophages against apoptosis induced by endoplasmic reticulum (ER) stress or oxidized LDL, through activation of phosphatidylinositol-3-kinase/Akt signaling.
Akt	207	AKT1	HSF1 gene	3297	HSF1	26347147		Furthermore, the absence of HSF1 gene suppressed heat stress-associated phosphorylation of Akt and p70 S6 kinase (p-p70S6K) in soleus muscle.
AKT	207	AKT1	HSF1	3297	HSF1		PMC4220119	Upstream regulators of the PMDS including E3 ligases such as CHIP such as HSF1, 2 or NRF1 could be activated or suppressed by the AKT stress response in a sex-dependent manner thereby differentially affecting proteostasis in peripheral and brain tissues.
mitogen-activated protein kinase 11	540207	ILK	HSF1	3297	HSF1		PMC4590596	Abbreviations 3-MA 3-methyladenine AMPK AMP-activated protein kinase ATF6 activating transcription factor 6 Baf A1 bafilomycin A1 CAMKK2 calcium/calmodulin-dependent protein kinase kinase 2: β EIF2AK3/PERK eukaryotic translation initiation factor 2-α kinase 3 ER endoplasmic reticulum ERN1/IRE1 endoplasmic reticulum to nucleus signaling 1 HSF1 heat shock transcription factor 1 HSPA5 heat shock 70k…
mitogen-activated protein kinase 14	540207	ILK	HSF1	3297	HSF1		PMC4590596	Abbreviations 3-MA 3-methyladenine AMPK AMP-activated protein kinase ATF6 activating transcription factor 6 Baf A1 bafilomycin A1 CAMKK2 calcium/calmodulin-dependent protein kinase kinase 2: β EIF2AK3/PERK eukaryotic translation initiation factor 2-α kinase 3 ER endoplasmic reticulum ERN1/IRE1 endoplasmic reticulum to nucleus signaling 1 HSF1 heat shock transcription factor 1 HSPA5 heat shock 70k…
ILK	3611	ILK	HSF-1	3297	HSF1	24314125		Our results thus identify HSF-1 as a novel effector of the organismal response to reduced ILK levels and show that ILK inhibition regulates HSF-1 in a cell nonautonomous fashion to enhance stress resistance and lifespan in C. elegans.
DNA-PK	5591	PRKDC	HSF1	3297	HSF1	9325337		The ability of HSF1 to interact with both components of DNA-PK provides a potential mechanism for the activation of DNA-PK in response to heat and other forms of stress.
Akt	207	AKT1	HSP90	3320	HSP90AA1	25935150		In this study, we investigated Aβ-effects on heat shock protein 90 (HSP90) interaction with eNOS and Akt in cultured vascular endothelial cells and also explored the role of oxidative stress in this process.
Akt	24185	AKT1	Hsp90	299331	HSP90AA1		PMC5489459	Akt, a client of Hsp90, binds to the middle domain of Hsp90 []. Hsp90 inhibition increases Akt degradation, which results in decreased Akt abundance accompanied by reduction of Akt activation []. Hsp90 also interacts with STAT-1α and STAT-3, which are required for STAT activation characterized by its phosphorylation and translocation from the cytosol to the nucleus in stressed cells [].
Akt	24185	AKT1	Hsp90	299331	HSP90AA1		PMC5489459	Akt, a client of Hsp90, binds to the middle domain of Hsp90 []. Hsp90 inhibition increases Akt degradation, which results in decreased Akt abundance accompanied by reduction of Akt activation []. Hsp90 also interacts with STAT-1α and STAT-3, which are required for STAT activation characterized by its phosphorylation and translocation from the cytosol to the nucleus in stressed cells [].
Akt	207	AKT1	GRP94	7184	HSP90B1	26891914		The selective inhibition of Akt activity also decreased 2-DG-induced GRP78 and GRP94 expression and increased CHOP expression, suggesting that Akt can modulate ER stress.
TBK1	29110	TBK1	HSPA1A	3303	Hspa1a		PMC4493955	These biomechanisms can be grouped in 6 clusters of cellular functions: (A) movement, proliferation and migration of cells (ANX2, F2, FGA, GRB2, BiP, MSN, PA2G4, THBS1, TLN1, TPM1, VASP, VASP28, VCL), (B) cellular assembly and organization (ARPC2, F2, PLEK, TBK1, THBS1, TPM1, (C) regulation and metabolism (NFX1, CC88B, S100A10), (D) chaperones and stress response (VDAC2, HSPA1A, HSPA1B, BiP), (E)…
AKT1	207	AKT1	HSP70	3308	HSPA4		PMC3672203	ERK1/2 and AKT1 signaling pathways have been proven to upregulate the expression of antioxidant proteins Cu/Zn-SOD, Mn-SOD, HO-1 and HSP70 in oxidative stress –.
Akt	11651	AKT1	HSP 70	3308	HSPA4		PMC5555886	Therefore, it was considered the possibility that the increase in HSP 70 contributes to the activation of Akt by heat stress.
AKT	11651	AKT1	GRP78	3309	HSPA5		PMC5458182	ER stress induces GRP78 expression and promotes an interaction between GRP78 and AKT, which in turn suppresses Ser473 phosphorylation of AKT and thereby modulates substrate, including AKT/mTOR/p70S6K pathway, specificity [].
PKB/Akt	11651	AKT1	grp78	3309	HSPA5		PMC400727	To test this possibility, we examined the expression and activation of proteins that are known to be involved in cell survival or stress responses, such as the early stress response protein, interleukin-8 (cIL-8), the survival protein, protein kinase B (PKB/Akt), the ER stress response protein, glucose-regulated protein 78 (grp78), and the cell cycle control and survival proteins, p53 and p21.
AKT	207	AKT1	GRP78	3309	HSPA5	21445305		An in-situ proximity ligation assay revealed a physical interaction between GRP78 and AKT at the plasma membrane of cells following induction of ER stress.
Akt	207	AKT1	GRP78	3309	HSPA5	26891914		The selective inhibition of Akt activity also decreased 2-DG-induced GRP78 and GRP94 expression and increased CHOP expression, suggesting that Akt can modulate ER stress.
Akt	207	AKT1	GRP78	3309	HSPA5		PMC4235288	Therefore, GRP78 induction mediated through PI3K/Akt/mTOR pathway may be responsible for the protection against ER stress.
AKT	11651	AKT1	GRP78	415113	HSPA5		PMC3061875	Figure S6 The degree of interaction between GRP78 and AKT is direct proportional to the severity of ER stress.
AKT	11651	AKT1	GRP78	415113	HSPA5		PMC3061875	Figure S5 Suppression of ER stress induced GRP78 by siGRP78 enhances AKT phosphorylation at both Thr308 and Ser473, and downstream signalling in JAR and HUVECs.
AKT	11651	AKT1	GRP78 protein	415113	HSPA5		PMC5380735	It has been shown that activation of PI3K/AKT pathway in ER-stressed HEK-293 cells leads to an increase in GRP78 protein stability through unknown mechanisms (Dai et al., ).
TBK1	29110	TBK1	BiP	3309	HSPA5		PMC4493955	These biomechanisms can be grouped in 6 clusters of cellular functions: (A) movement, proliferation and migration of cells (ANX2, F2, FGA, GRB2, BiP, MSN, PA2G4, THBS1, TLN1, TPM1, VASP, VASP28, VCL), (B) cellular assembly and organization (ARPC2, F2, PLEK, TBK1, THBS1, TPM1, (C) regulation and metabolism (NFX1, CC88B, S100A10), (D) chaperones and stress response (VDAC2, HSPA1A, HSPA1B, BiP), (E)…
Rac	207	AKT1	heat shock protein 70	3312	HSPA8	10850962		Mechanical stress-induced heat shock protein 70 expression in vascular smooth muscle cells is regulated by Rac and Ras small G proteins but not mitogen-activated protein kinases.
Akt	207	AKT1	Hsp27	3315	HSPB1	18299320		During stress, Hsp27 expression prevented the inactivation of Akt, a pro-survival kinase, and increased the interaction between Akt and Bax, an Akt substrate.
MK2	9261	MAPKAPK2	HSP25	3315	HSPB1	19240800		We postulated that MK2 activation via p38 MAP kinase induced HSP25 phosphorylation, in response to mechanical stress, leading to actin stress fiber formation and endothelial barrier dysfunction.
MAPKAP kinase-2	9261	MAPKAPK2	HSP27	3315	HSPB1	9057088		We have studied the contribution of the individual kinases of the MAP (mitogen-activated protein) kinase family, including ERK (extracellular-signal regulated kinase), JNK/SAPK (c-JUN NH2-terminal kinase/stress-activated protein kinase) and p38, to activation of the HSP27 (heat shock protein 27) kinase MAPKAP kinase-2/3 and to HSP27 phosphorylation in Chinese hamster CCL39 cells stimulated by eit…
MK2	17164	MAPKAPK2	HSP25	15507	HSPB1		PMC2643011	In parallel experiments, lung homogenates obtained from MK2−/− mice exposed to MV with HVT displayed normal amounts of total HSP25, however, without evidence of activation (i.e., phospho-HSP25) in response to HVT MV (), further suggesting that MK2 is necessary for HSP25 phosphorylation in response to mechanical stress.
PKB/Akt	11651	AKT1	HSP27	69253	HSPB2		PMC2132705	With regard to sHSP, HSP27 was very recently shown to bind and activate PKB/Akt/RAC-protein kinase in response to heat or oxidative stress ().
PKB/Akt	11651	AKT1	HSP27	69253	HSPB2		PMC2132705	With regard to sHSP, HSP27 was very recently shown to bind and activate PKB/Akt/RAC-protein kinase in response to heat or oxidative stress ().
PKB	207	AKT1	Hsp27	3316	HSPB2	9237690		These results suggest that Hsp27 is involved in the activation process of PKB in the signal transduction pathway of various forms of stress.
Akt1	207	AKT1	Hsp60	3329	HSPD1	24332918		Our aim was to clarify the interaction of Akt1 and Hsp60 and to investigate the Akt1 expression in normal and failing hearts in acute and chronic stress.
PKB	207	AKT1	p27	3429	IFI27	20036235		These results indicate that p27(NCDK) is a sensitive marker for both cell stress and proliferation over and above p27 and is regulated by Akt/PKB and AMPK pathways.
Akt	207	AKT1	p27	3429	IFI27	20036235		These results indicate that p27(NCDK) is a sensitive marker for both cell stress and proliferation over and above p27 and is regulated by Akt/PKB and AMPK pathways.
PKB	207	AKT1	p27	3429	IFI27	20036235		Non-CDK-bound p27 (p27(NCDK)) is a marker for cell stress and is regulated through the Akt/PKB and AMPK-kinase pathways.
AKT	207	AKT1	IFNG	3458	IFNG		PMC4538604	However, knowing that the endothelial AKT signals were not activated with the IFNG treatments (), we hypothesized that RNF213 might mediate angiogenic responses of endothelial cells through PI3K-AKT-dependent and -independent mechanisms under inflammatory stresses.
Akt	207	AKT1	IGF-1	3479	IGF1	10873605		Thus, the results suggest that IGF-1 regulates osmotic stress-induced apoptosis via the activation of the PI3-K/Akt pathway at a point upstream of the mitochondria and caspase-3.
AKT	207	AKT1	insulin-like growth factor I	3479	IGF1	15630079		Both activation of the phosphatidylinositol 3-kinase/Akt (PI-3-K/AKT) pathway by insulin-like growth factor I and pharmacological blockage of the stress activated c-Jun NH(2)-terminal kinase (JNK) offer transitory neuroprotection from the cell death evoked by nondepolarizing concentrations of potassium.
Akt	207	AKT1	insulin-like growth factor I	3479	IGF1	15630079		Both activation of the phosphatidylinositol 3-kinase/Akt (PI-3-K/AKT) pathway by insulin-like growth factor I and pharmacological blockage of the stress activated c-Jun NH(2)-terminal kinase (JNK) offer transitory neuroprotection from the cell death evoked by nondepolarizing concentrations of potassium.
Akt	207	AKT1	IGF-I	3479	IGF1	18801901		IGF-I inhibited ER stress-induced apoptosis by restoring the phosphorylation level of Akt.
Akt	207	AKT1	insulin-like growth factor-1	3479	IGF1	14713298		Stimulation of a variety of cell types with insulin-like growth factor-1, insulin, or stress (induced by heat shock), induced translocation of Akt to the mitochondria within only several minutes of stimulation, causing increases of nearly eight- to 12-fold, and the mitochondrial Akt was in its phosphorylated, active state.
AKT	24185	AKT1	IGF-1	24482	IGF1		PMC2837204	In this respect, it is important to stress that while circulating IGF-1 activates typically PI3K/AKT/mTOR and MAPK pathways [], locally acting mIGF-1 does not activate these canonical pathways in cardiomyocytes, impinging instead on PDK1 and SGK1 signaling [].
Akt1	280991	AKT1	Igf1 gene	3479	IGF1		PMC5100975	For hypertrophy genes, we found that controlled heat stress mediated four important genes, i.e. Adrb2, Acta1, Akt1, Akt2, but suppressed the expression of the Igf1 gene.
Akt2	208	AKT2	Igf1 gene	3479	IGF1		PMC5100975	For hypertrophy genes, we found that controlled heat stress mediated four important genes, i.e. Adrb2, Acta1, Akt1, Akt2, but suppressed the expression of the Igf1 gene.
AKT	207	AKT1	IGF1R	3480	IGF1R		PMC4613300	Based on the evidence that IGF1R, which is a target of miR-122, could induce the activation of MAPK or PI3S/AKT signaling, these results also support applying miR-122 as a specific sensitizer of MSCLC radio-therapy via enhancement of the sensitivity of cells to stress or injury in the future.
AKT	207	AKT1	IGF-1R	281848	IGF1R		PMC5495754	It is known that IGF-1R activates AKT, which in turn can inhibit PTEN through inactivating the PTEN activator FoX3a via phosphorylation, resulting in inhibition of the PTEN downstream effector eIF2α, an ER stress marker, which is involved in modulating immune responses.
Akt	207	AKT1	IL-13	3596	IL13	26909320		IL-13 induced phosphorylation of Akt, increased IRS2 protein expression and counteracted the IL-1β induced regulation of several beta-cell stress response genes.
Akt	207	AKT1	IL-13	3596	IL13		PMC4236671	As a novel nuclear marker, IL-33 has been identified as an endogenous alarm in the immune system when the endothelium gets injured during infection and stress []. IL-4 and IL-13 both decrease the sensitivity of vascular EC to complement-mediated killing and apoptosis through the activation of a PI3K/Akt Pathway [].
Akt	207	AKT1	IL-13	3596	IL13		PMC4735661	IL-13 induced phosphorylation of Akt, increased IRS2 protein expression and counteracted the IL-1β induced regulation of several beta-cell stress response genes.
AKT	207	AKT1	IL-1	25670	IL15		PMC3612448	Furthermore, ROS production in hepatoma cells infected with Hepatitis C virus (HCV) activated STAT3 through JAK, Src kinase, and p38 MAP kinase pathways [], and the decreased phosphorylation of p38 MAPK blocks the oxidative stress-induced senescence of myeloid leukemic cells []. PI-3K/AKT pathways, playing an important role in cell survival, proliferation, and growth, were activated by IL-1, lead…
Akt	207	AKT1	IL-26	55801	IL26	18483078		IL-26 activates extracellular signal-related kinase (ERK)-1/2 and stress-activated protein kinase/c-Jun N-terminal kinase (SAPK/JNK) mitogen-activated protein (MAP) kinases, Akt and signal transducers and activators of transcription (STAT) 1/3.
Akt	207	AKT1	IL-4	3565	IL4		PMC4236671	As a novel nuclear marker, IL-33 has been identified as an endogenous alarm in the immune system when the endothelium gets injured during infection and stress []. IL-4 and IL-13 both decrease the sensitivity of vascular EC to complement-mediated killing and apoptosis through the activation of a PI3K/Akt Pathway [].
AKT	207	AKT1	Il6	3569	IL6		PMC4587544	We found 11 pathways altered in ≥5% of HCC ( and ,,): TERT promoter mutations activating telomerase expression (60%), WNT/ß-Catenin (54%), PI3K/AKT/mTOR (51%), TP53/cell cycle (49%), MAP kinase (43%), hepatic differentiation (34%), epigenetic regulation (32%) chromatin remodeling (28%), oxidative stress (12%), Il6/JAK/STAT (9%), and TGFß (5%).
Akt	11651	AKT1	IL-6	3569	IL6		PMC3856010	Activation of Akt can be mediated by hormones [], cytokines of the IL-6 family [] and other plasma proteins like periostin, which are all elevated during cardiac stress [,].
AKT	207	AKT1	IL-6	3569	IL6		PMC5615342	Importantly, 11 pathways are frequently altered in HCCs: TERT promoter mutations activating telomerase expression (about 60%), WNT/beta-catenin (54%), PI3K-AKT-mTOR (51%), TP53/cell cycle (49%), MAPK (43%), hepatic differentiation (34%), epigenetic regulation (32%), chromatin remodeling (28%), oxidative stress (12%), IL-6/JAK-STAT (9%) and TGF-beta [].
ILK	3611	ILK	IL-6	280826	IL6		PMC5541713	In summary, because ILK is activated in response to IL-6 and other environmental signals,, the unique ability of ILK to regulate MUC1-C stability, in conjunction with STAT3-activated MUC1 gene expression, enables pancreatic cancer cells to interact with stress signals in the tumor microenvironment, such as IL-6 and hypoxia.
PKB/Akt	11651	AKT1	ILK	3611	ILK		PMC2265410	ILK is required for the mechanical stress-induced activation of PKB/Akt ILK is believed to phosphorylate and, thereby, modulate the activity of several target proteins, including PKB/Akt, which, in turn, plays a central role during the repair of skeletal muscle by activating the mTOR complex and downstream targets such as S6K and 4E-BP (; ).
PKB	207	AKT1	SHIP2	3636	INPPL1	17643961		SHIP2 controls PtdIns(3,4,5)P(3) levels and PKB activity in response to oxidative stress.
Akt	207	AKT1	insulin	3630	INS	20360254		Agents that induced ER stress increased TRB3 expression in cultured cardiac myocytes while blocking insulin-stimulated Akt activation in these cells.
Akt	207	AKT1	insulin	3630	INS	21454445		Ketogenic diet-fed mice ultimately develop systemic glucose intolerance, hepatic endoplasmic reticulum stress, steatosis, cellular injury, and macrophage accumulation, but surprisingly insulin-induced hepatic Akt phosphorylation and whole-body insulin responsiveness are not impaired.
Akt	207	AKT1	insulin	3630	INS	22209681		One such case is the prevention of FoxO1 expression by activated insulin-induced phosphatidylinositol 3-kinase (PI3K)/Akt, which leads to increased oxidative stress and aging processes.
AKT	11651	AKT1	insulin	3630	INS		PMC5551225	It is noteworthy that IR is characterized by impairment of the insulin-induced activation of the insulin receptor substrate (IRS)/phosphoinositide 3-kinase (PI3K)/protein kinase B (AKT) pathway, leading to suppression of the insulin-induced glucose uptake in the insulin-sensitive organs, such as the liver []. PM2.5-induced oxidative stress has been considered as a key molecular mechanism of PM2.5…
Akt	207	AKT1	Insulin	3630	INS	17972158		Insulin-induced PI3K/Akt activation is known to inhibit a family of Forkhead transcription factors (FOXO), which can lead to increased oxidative stress in several model organisms.
Akt	11651	AKT1	insulin	3630	INS		PMC5320395	3.4 Effect of ER stress on insulin-stimulated Akt and eNOS phosphorylation We then evaluated whether OB-plasma might impair insulin-stimulated Akt and eNOS activation by phosphorylation.
Akt	207	AKT1	insulin	3630	INS	22117553		Knockdown of cortactin by siRNA did not inhibit insulin-induced Akt phosphorylation but completely inhibited actin stress fiber formation and glucose uptake.
Akt	207	AKT1	insulin	3630	INS	22117553		Wortmannin, genistein, and a PP1 analog completely blocked insulin-induced Akt phosphorylation, formation of actin stress fibers, and GLUT4 translocation indicating the involvement of both PI3-K/Akt and the Src family of kinases.
Akt	24185	AKT1	insulin	280829	INS		PMC3845241	The aim of our present study is to determine the effect of Gelam honey extract and quercetin on the stress activated NF-κB and MAPK pathways and IRS-1 serine phosphorylation causing insulin resistance and the Akt activated insulin signaling pathway, causing increase in insulin content.
Akt	11651	AKT1	insulin	280829	INS		PMC3845241	Cell lysate was collected to determine the effect of honey extracts and quercetin on the stress activated NF-κB, MAPK pathways, and the Akt (ser473) activated insulin signaling pathway.
AKT	207	AKT1	insulin	3630	INS	25767056		Concomitantly, EPO partially rescued insulin-stimulated AKT activation, reduced markers of oxidative stress, and restored heat-shock protein 72 expression in soleus muscles from HFD-fed rats.
Akt	24185	AKT1	insulin	3630	INS		PMC2628605	The decreased JNK activation by imatinib observed in the liver of db/db mice is consistent with amelioration of endoplasmic reticulum stress, reduced IRS-1 Ser307 phosphorylation, and an increase in insulin-induced phosphorylation of IRS-1 Tyr612 or Akt Thr308, because JNK activation is an important part in endoplasmic reticulum stress response () and because JNK activation has been reported to i…
Akt	207	AKT1	Insulin	3630	INS	11104747		Insulin prevents cardiomyocytes from oxidative stress-induced apoptosis through activation of PI3 kinase/Akt.
Akt	11651	AKT1	insulin	280829	INS		PMC5052408	Anti-IL-1β antibody pretreatment also protected the insulin-induced phosphorylation of Akt against TG insult, further indicating the crucial role of ER stress-associated NLRP3 inflammasome activation in the development of insulin resistance.
Akt	11651	AKT1	insulin	280829	INS		PMC5052408	Neutralizing IL-1β with anti-IL-1β antibody effectively preserved insulin-mediated Akt activation, indicating ER stress-associated NLRP3 inflammasome activation was responsible for the impairment of insulin signaling.
Akt	11651	AKT1	insulin	3630	INS		PMC4158559	Moreover, insulin regulates mitochondrial metabolism and oxidative capacity through PI3K/Akt signaling [, ]; therefore, decreased Akt signaling by hyperinsulinemia- mediated IR may have profound effects on mitochondrial function in neurons and result in subsequent increased oxidative stress [].
Akt	207	AKT1	insulin	3630	INS	24324490		Cell lysate was collected to determine the effect of honey extracts and quercetin on the stress activated NF- κ B, MAPK pathways, and the Akt (ser473) activated insulin signaling pathway.
Akt	207	AKT1	insulin	3630	INS		PMC3676851	The finding that insulin-resistant patients show an elevated risk for several types of cancer further support a link between oxidative stress/chronic inflammation and tumorigenesis; insulin signaling (together with insulin-like growth factor (IGF), leptin and inflammatory cytokines) has mitogenic properties through activation of the PI3K/Akt/mammalian target of rapamycin (mTOR) pathway [].
Akt	207	AKT1	insulin	3630	INS	14713298		Stimulation of a variety of cell types with insulin-like growth factor-1, insulin, or stress (induced by heat shock), induced translocation of Akt to the mitochondria within only several minutes of stimulation, causing increases of nearly eight- to 12-fold, and the mitochondrial Akt was in its phosphorylated, active state.
Akt	11651	AKT1	insulin	3630	INS		PMC3096078	In addition, it was also shown that several other stimuli including insulin-like growth factor-I (IGF-I) [], insulin [], angiopoietin-1 (Ang-1) [], hepatocyte growth factor [], the small proteoglycan decorin [], fluid shear stress [], sphingosine-1-phosphate (S1P) [], estrogen [], reactive oxygen species [], and corticosteroids [] also activate Akt signaling, illustrating the central role of this…
AKT	207	AKT1	insulin	3630	INS		PMC1925119	In contrast, insulin in combination with TNF both antagonizes stress signaling and induces separate prosurvival signaling pathways through phosphorylated AKT, insulin receptor substrate 1 (IRS1), Forkhead transcription factor (P-FKHR), and procaspase-3 metrics [].
Akt	207	AKT1	insulin	3630	INS	24744283		Analysis of our data suggested that PKC activation and oxidative stress may selectively inhibit insulin-induced Akt and eNOS activation, causing endothelial dysfunction and inflammation.
AKT1	280991	AKT1	insulin	280829	INS		PMC4467869	Previously, we have shown that Nrf2 deficiency results in increased levels of oxidative stress and cell death [], and activation of AKT1/2 signaling in response to growth factors such as insulin and PDGF is impaired in Nrf2-deficient primary alveolar type II epithelial cells [].
Akt	207	AKT1	insulin	3630	INS		PMC4032293	Specifically, Akt and ERKs are usually activated by growth signals, such as insulin and nutrients, while p38 MAPK and JNK are often activated by stress-responsive signals .
Akt	24185	AKT1	insulin	3630	INS		PMC3581203	Consistently, PA28A-deficient animals displayed increased UPR response, evident by elevated expression of several ER stress indicators such as PERK, IRE1α, and eIF2α phosphorylation, GRP78 and CHOP accumulation, JNK activation, and the consequential decrease in insulin-induced Akt phosphorylation.
AKT	207	AKT1	insulin	3630	INS	15194403		Epidermal growth factor and insulin inhibit cell death in pancreatic beta cells by activation of PI3-kinase/AKT signaling pathway under oxidative stress.
Akt	24185	AKT1	insulin	3630	INS		PMC4100392	Moreover, liver cells exposed to pharmacological triggers of ER stress response show IR profiles characterized by serine phosphorylation of IRS-1 and suppression of insulin-induced Akt phosphorylation.
Akt	11651	AKT1	insulin	3630	INS		PMC4808561	Therefore, in our present study, we determined the effect of Gelam honey extract and quercetin on the oxidative stress activated JNK and IKK-β inflammatory pathways and IRS-1 serine phosphorylation causing insulin resistance and the Akt activated insulin signaling pathway, which attenuates the inflammation, thereby increasing insulin sensitivity.
Akt	11651	AKT1	insulin	3630	INS		PMC4808561	Furthermore, we investigated the effect of Gelam honey extract and quercetin on the stress activated NF-κB and MAPK pathways and IRS-1 serine phosphorylation causing insulin resistance and the Akt activated insulin signaling pathway, causing increase in insulin content.
Akt	207	AKT1	insulin	3630	INS		PMC5279911	Similarly, insulin sensitivity, as assessed through glucose utilization in hyperinsulinemic-euglycemic clamp, was partially improved in HFD mice treated with L-NIL and was completely normalized with double pharmacological blockade (G). 3.8 Pharmacological inhibition of ER stress and iNOS improves insulin signaling through Akt phosphorylation, decreased JNK phosphorylation and ER stress in C57BL/6…
PKB	11652	AKT2	insulin	280829	INS		PMC3116857	Figure 2 ER stress decreases insulin-induced phosphorylation of PKB and S6K1 Tunicamycin () and thapsigargin () also repressed insulin-induced phosphorylation of PKB and S6K1, but this repression was not complete.
Akt	11651	AKT1	insulin receptor	3643	INSR		PMC4133883	After binding with insulin, insulin receptor activates downstream factors such as PI3K/Akt/Ras and/or represses forkhead box O (FOXO) transcription factor, which is well-known to regulate stress response genes .
Akt1	207	AKT1	insulin receptor	3643	INSR	26783834		The conserved insulin receptor signalling pathway acts to regulate energy balance and nutrient intake, and its central component Akt1 and endpoint effector foxo are pivotal for survival during nutritional stress.
PKB/Akt	11651	AKT1	insulin receptors	24954	INSR		PMC3855992	It promoted the PKB/Akt and -PPAR-α and -γ systems, activated insulin receptors, and regulated ER stress-related proteins and enzymes.
mammalian PKB	207	AKT1	PIP3	26034	IPCEF1		PMC4107846	PIP3 activates the central kinase AKT-1 (ortholog to mammalian PKB), which phosphorylates DAF-16, the C. elegans FOXO transcription factor, preventing its entry into the nucleus where it would otherwise regulate the expression of genes contributing to longevity, stress response, and metabolism.
AKT-1	179424	AKT1	PIP3	26034	IPCEF1		PMC4107846	PIP3 activates the central kinase AKT-1 (ortholog to mammalian PKB), which phosphorylates DAF-16, the C. elegans FOXO transcription factor, preventing its entry into the nucleus where it would otherwise regulate the expression of genes contributing to longevity, stress response, and metabolism.
PDK1	5170	PDPK1	PIP3	26034	IPCEF1		PMC2653516	When shear stresses activate PI3K, it phosphorylates PIP2 to PIP3, and at this time, phosphoinositide-dependent kinase 1 (PDK1) may bind to PIP3 through its PH domain.
phosphoinositide-dependent kinase 1	5170	PDPK1	PIP3	26034	IPCEF1		PMC2653516	When shear stresses activate PI3K, it phosphorylates PIP2 to PIP3, and at this time, phosphoinositide-dependent kinase 1 (PDK1) may bind to PIP3 through its PH domain.
TBK1	29110	TBK1	IRF3	516979	IRF3		PMC5149527	Together, these data suggest that the activation of IRF3 requires the mobilization of STING and TBK1, mediated by ER stress during M. bovis infection.
Akt	207	AKT1	IRS2	8660	IRS2		PMC4283651	Overall, the present data can be unified in the following model (): diabetes increases ROS production and enhances PKA activity, possibly by increasing AC3 and AC8 and/or decreasing PDE3 expression; (2) chronic activation of PKA and/or a heightened state of oxidative stress stabilizes and elicits persistent elevation of ICER; (3) excessive accumulation of ICER inhibits CRE transcriptional activit…
Akt	207	AKT1	CD29	3688	ITGB1	22198504		CD29 also induced phosphorylation of the inhibitory Ser9 on the pro-apoptotic kinase glycogen synthase kinase-3β in a PI3K/Akt- and MEK-dependent manner, and improved cardiomyocyte viability under conditions of oxidative stress.
AKT	11651	AKT1	Melusin	26548	ITGB1BP2		PMC5018970	Melusin-dependent activation of ERK1/2 and AKT under mechanical stress.
Akt	207	AKT1	janus-kinase-2	3717	JAK2		PMC3977870	Polyclonal antibodies to phosphorylated janus-kinase-2 (JAK-2, Tyr221), extracellular signal-regulated kinase (ERK)-1/2 (Thr183/Tyr185), phosphorylated stress-activated protein kinase (c-Jun N-terminal kinase) SAPK/JNK-1/2 (Thr183/Tyr185), and phospho-Akt (Ser473) were purchased from Cell Signaling (Beverly, MA, U.S.A.).
Akt	207	AKT1	Jun-N terminal kinase	3725	JUN		PMC2773776	Until now, the PI3K/Akt pathway, the mitogen-activated protein kinase (MAPK)/extracellular signal-regulated kinase (ERK) pathway, the stress activated protein kinase (SAPK)/Jun-N terminal kinase (JNK) and the sphingolipid pathway have been identified as important drug targets [-].
Akt	207	AKT1	c-Jun	3725	JUN	11568138		Protein kinase B/Akt activates c-Jun NH(2)-terminal kinase by increasing NO production in response to shear stress.
PKB/Akt	11651	AKT1	Jun	3725	JUN		PMC3533737	Moreover, different cytoplasmic signal transduction cascades appear to be affected by HBx, including the stress-activated protein kinases/NH2-terminal-Jun kinase (SAPK/JNK), extracellular signal-regulated kinase (ERK), protein kinase B (PKB/Akt), Ras-Raf-mitogen-activated protein kinase (Ras-Raf-MAPK), the Janus kinase/STAT (JAK/STAT), and the adhesion kinase (FAK) and proline-rich tyrosine kinas…
Akt	207	AKT1	c-jun	3725	JUN		PMC4673665	In the endothelium, mechanical stress leads to the activation of multiple signaling protein kinases including Src, v-akt murine thymoma viral oncogene homolog (Akt), extracellular signal-regulated kinase (Erk), Jnk (c-jun N-terminal kinase), and VEGF receptor 2 (VEGFR2; Davies, ).
v-akt murine thymoma viral oncogene homolog	207	AKT1	c-jun	3725	JUN		PMC4673665	In the endothelium, mechanical stress leads to the activation of multiple signaling protein kinases including Src, v-akt murine thymoma viral oncogene homolog (Akt), extracellular signal-regulated kinase (Erk), Jnk (c-jun N-terminal kinase), and VEGF receptor 2 (VEGFR2; Davies, ).
PKB	207	AKT1	Jun amino-terminal kinase	3725	JUN		PMC3556779	However, to this point, we have been unable to detect a substantial TGFβ-induced activation of the noncanonical TGFβ-signaling pathways p38 mitogen-activated protein (MAP) kinase, stress-activated protein kinase (SAPK)/Jun amino-terminal kinase (JNK), extracellular-signal-regulated kinases 1 and 2 (ERK1/2), or protein kinase B (PKB or AKT) in primary T cells (A–S5H), consistent with observations …
Akt	207	AKT1	Jun-N-terminal kinase	3725	JUN		PMC420486	On the contrary, key proteins, such as stress activated protein kinase (SAPK) or Jun-N-terminal kinase (JNK), the 38 kDa mitogen activated kinase (p38 MAPK), and Akt or protein kinase B, involved in two alternative mitogen activated protein kinases (MAPK) pathways and the phosphoinositide-3-phosphate kinase (PI3K) pathway, respectively, showed no change in activation in PLCδ4 overexpressing cells…
Akt	207	AKT1	c-Jun	3725	JUN		PMC3538125	Reactive oxygen species activate different interlinked signaling pathways which can be involved in ischemic decisions about cell survival/death such as the stress-activated protein kinases, c-Jun N-terminal kinases, p38 mitogen-activated protein kinases, extracellular signal-regulated kinases, and Akt pathways [–].
AKT	207	AKT1	c-Jun NH2-terminal kinase	3725	JUN		PMC3917270	The antibodies against AKT, Rac-1, MAPK/extracellular signal-regulated kinase (ERK) 1/2, c-Jun NH2-terminal kinase (JNK)/stress-activated protein kinase, and p38 MAPK proteins and phosphorylated proteins were purchased from Cell Signaling Technology (Beverly, MA, USA).
AKT	207	AKT1	JunB	3726	JUNB	24786832		In conclusion, JunB modulates the β-cell ER stress response and AKT signaling via the induction of XBP1s.
Akt	207	AKT1	Kank	23189	KANK1	18458160		Based on these findings, we hypothesize that Kank negatively regulates the formation of actin stress fibers and cell migration through the inhibition of RhoA activity, which is controlled by binding of Kank to 14-3-3 in PI3K-Akt signaling.
Akt	207	AKT1	GCN5	2648	KAT2A	21281601		GCN5 regulates the activation of PI3K/Akt survival pathway in B cells exposed to oxidative stress via controlling gene expressions of Syk and Btk.
AKT1	817206	KT1	AtKC1	829400	KAT3		PMC5440519	Currently, AtKC1 is accepted to be involved in modulating AKT1 expression under low K+ stress responses in Arabidopsis (Wang et al., ).
AKT	207	AKT1	VEGFR2	3791	KDR		PMC4769761	Real-time PCR and Western blot assays were used to analyze mRNA and protein expression of hippocampal VEGF and VEGFR2, as well as the signal pathway changes of PI3K/AKT/mTOR induced by VEGFR2, in order to explore relevant biological foundation of VEGF in anger emotional stress expression.
AKT	207	AKT1	VEGFR2	3791	KDR		PMC4769761	We discuss the influence of anger emotional stress upon VEGF/VEGFR2 and its induced PI3K/AKT/mTOR signal pathway.
AKT	207	AKT1	VEGFR2	3791	KDR	27057362		We discuss the influence of anger emotional stress upon VEGF/VEGFR2 and its induced PI3K/AKT/mTOR signal pathway.
Akt	207	AKT1	VEGFR2	3791	KDR		PMC4673665	In the endothelium, mechanical stress leads to the activation of multiple signaling protein kinases including Src, v-akt murine thymoma viral oncogene homolog (Akt), extracellular signal-regulated kinase (Erk), Jnk (c-jun N-terminal kinase), and VEGF receptor 2 (VEGFR2; Davies, ).
Akt	11651	AKT1	VEGFR2	3791	KDR		PMC3743752	Some reports have shown that VEGFR2-mediated activation of the PI3K/Akt pathway by mechanical stress is relatively delayed (within minutes) , , compared with the GPCR-mediated activation of the PKA pathway that occurs relatively quickly (within seconds) , .
AKT	207	AKT1	Kidins220	77480	KIDINS220		PMC5216953	In PCa, Kidins220 may activate PI3K/AKT signaling to sustain cancer cell growth under the stress of androgen deprivation and lead to CRPC.
ILK	53573	ILK	Klotho gene	16591	klotho		PMC4637093	We hereby propose that the reduction of ILK expression induces Klotho gene as a mechanism of stress response.
MK2	9261	MAPKAPK2	KRAS	541140	KRAS		PMC5527460	Consistent with this, it has recently been reported that targeting the global stress kinase pathway p38/MK2 in combination with CHK1 significantly enhanced toxicity in a KRAS‐mutant‐dependent manner (Dietlein et al., ).
AKT1	11651	AKT1	Cu	56735	KRT71		PMC4168210	Conclusion Our results showed that 2-24a/Cu efficiently generates oxidative stress and down-regulates HSP90AA1 and its client proteins (PIM1, AKT1) in U2os and HeLa cells.
AKT	207	AKT1	Leptin	3952	LEP	26053184		Leptin exposure increased cancer cell migration/invasion through leptin-mediated activation of JAK/STAT3, PI3/AKT and RhoA/ROCK and promoted new lamellipodial, stress-fiber and focal adhesion formation.
MK2	9261	MAPKAPK2	VEGF-A-induced LIMK1	3984	LIMK1	16456544		Knockdown of MK2 by siRNA suppressed VEGF-A-induced LIMK1 activation, stress fiber formation, and cell migration.
Akt	207	AKT1	Lyn	81515	LYN		PMC5233819	3.2 Lyn inhibited mucus hypersecretion and ER stress associated with PI3K, Akt and NFκB The role of ER stress in airway mucus production has been established.
LRRK2	120892	LRRK2	phosphorylate MAP2K3	26397	MAP2K3		PMC5059726	Beclin-1 has been found to be phosphorylated and regulated by the stress responsive kinases MAPKAPK2 and 3; LRRK2 has been suggested to bind and phosphorylate MAP2K3 (MKK3) upstream of MAPKAPK2/3 in the p38-MAPK pathway.
Akt1	207	AKT1	MKK4	6416	MAP2K4	15998799		Concomitantly, Akt1 interacts with stress-activated protein kinase/extracellular signal-regulated kinase (SEK) 1 (also known as MKK4) and inhibits SEK1 activity.
Akt	207	AKT1	MEK5	5607	MAP2K5		PMC5547215	Together these results suggest MEK5-ERK5 signaling modulates ER stress-mediated apoptosis via the PI3-kinase-Akt pathway.
Akt	207	AKT1	MEK	5609	MAP2K7	21820214		Here we show that extracellular PGRN stimulates phosphorylation/activation of the neuronal MEK/extracellular regulated kinase (ERK)/p90 ribosomal S6 kinase (p90RSK) and phosphatidylinositol-3 kinase (PI3K)/Akt cell survival pathways and rescues cortical neurons from cell death induced by glutamate or oxidative stress.
MAPKAPK2	9261	MAPKAPK2	MEKK3	4215	MAP3K3	10347227		Furthermore, MAPKAPK2 phosphorylation induced by MEKK3 or cellular stress was abolished by the p38 inhibitor SB-203580, suggesting that MEKK3 is coupled to p38 activation in intact cells.
PKB	11651	AKT1	ASK1	26408	MAP3K5		PMC3856021	It is reported that PIG-1 and cell death gene-3 (CED-3) double mutants result in nearly 100% of lineages producing extra HSN and PHB neurons, leading to dramatically stronger programmed cell death than either single mutant, which suggests that PIG-1 acts at least partly in parallel to the canonical cell death pathway []. PIG-1 also regulates cell size asymmetry and asymmetric neuroblast divisions…
Akt	11651	AKT1	ASK1	26408	MAP3K5		PMC3856021	It is reported that PIG-1 and cell death gene-3 (CED-3) double mutants result in nearly 100% of lineages producing extra HSN and PHB neurons, leading to dramatically stronger programmed cell death than either single mutant, which suggests that PIG-1 acts at least partly in parallel to the canonical cell death pathway []. PIG-1 also regulates cell size asymmetry and asymmetric neuroblast divisions…
AKT	11651	AKT1	ASK-1	26408	MAP3K5		PMC4279438	In fact, the absence of eIF-2α phosphorylation, IRE-1 phosphorylation and CHOP induction suggest that induction of JNK phosphorylation during DEPTOR silencing is not due to ER stress but mediated by an independent mechanism, possibly secondary to AKT down-regulation as it has been previously reported [] that AKT negatively regulates the ASK-1/JNK cascade.
stress-activated protein kinase-2	9261	MAPKAPK2	stress-activated protein kinase-1	26411	MAP4K1		PMC4623319	Regulation of IL-10 transcription by p38 involves the transcription factor Sp1 , the activation of the downstream kinases mitogen- and stress-activated protein kinase-1 and mitogen- and stress-activated protein kinase-2 and CREB phosphorylation and the post-transcriptional regulation of IL-10 by macrophages in response to TLR4 ligation by helping to protect the Il10 mRNA from rapid degradation in…
stress-activated protein kinase-2	9261	MAPKAPK2	stress-activated protein kinase-1	26411	MAP4K1		PMC4623319	Regulation of IL-10 transcription by p38 involves the transcription factor Sp1 , the activation of the downstream kinases mitogen- and stress-activated protein kinase-1 and mitogen- and stress-activated protein kinase-2 and CREB phosphorylation and the post-transcriptional regulation of IL-10 by macrophages in response to TLR4 ligation by helping to protect the Il10 mRNA from rapid degradation in…
Akt	207	AKT1	MAPK	3354888	MAPK1		PMC4020307	NM23 silencing in hepatoma and colon carcinoma cell lines resulted in upregulation of the membrane associated matrix metalloproteinase (MT1-MMP), increased Rac1 signaling and activation of several pro-invasive signaling pathways such as MAPK (mitogen activated protein kinase)/SAPK (stress-activated protein kinases), Akt [].
Akt	207	AKT1	ERK	5594	MAPK1		PMC4118225	The soluble vascular cell adhesion molecule/very late antigen-4 signalling pathway may also induce migration of Sca-1POS cells and prevent CMC death from oxidative stress through activation of Akt, extracellular signal-regulated kinase (ERK), and p38 MAPK [].
Akt	207	AKT1	ERK	5594	MAPK1	21205476		Endoplasmic reticulum stress-induced Akt activation is mediated through PI3K and the PI3K/Akt pathway inactivation is involved in increased ERK activity in human hepatocellular carcinoma cells.
Akt	207	AKT1	ERK	5594	MAPK1	21205476		Furthermore, myr-Akt inhibited endoplasmic reticulum stress-mediated ERK phosphorylation.
Akt	207	AKT1	ERK	5594	MAPK1	20020442		In addition to UPR, phosphatidylinositol 3-kinase (PI3K)/Akt and extracellular signal regulated kinase (ERK) signaling pathways protect a variety of cells from ER stress.
Akt	207	AKT1	p38	5594	MAPK1	12771803		Primary culture rodent bladder SMC or cardiac myofibroblasts were subjected to cyclic stretch-relaxation in the absence or presence of pharmacologic inhibitors of the phosphoinositide-3-kinase, (PI3K)/Akt, extracellular signal-regulated kinase-mitogen activated protein kinase (Erk-MAPK) or the p38 stress-activated protein kinase-2 (SAPK2) pathways.
Akt	207	AKT1	Erk-MAPK	5594	MAPK1	12771803		Primary culture rodent bladder SMC or cardiac myofibroblasts were subjected to cyclic stretch-relaxation in the absence or presence of pharmacologic inhibitors of the phosphoinositide-3-kinase, (PI3K)/Akt, extracellular signal-regulated kinase-mitogen activated protein kinase (Erk-MAPK) or the p38 stress-activated protein kinase-2 (SAPK2) pathways.
Akt	207	AKT1	ERK	5594	MAPK1		PMC2773776	Until now, the PI3K/Akt pathway, the mitogen-activated protein kinase (MAPK)/extracellular signal-regulated kinase (ERK) pathway, the stress activated protein kinase (SAPK)/Jun-N terminal kinase (JNK) and the sphingolipid pathway have been identified as important drug targets [-].
Akt	207	AKT1	ERK	5594	MAPK1	16301324		We show that Crry increases early TCR-dependent activation signals, including p56lck-, zeta-associated protein-70 (ZAP-70), Vav-1, Akt, and extracellular signal-regulated kinase (ERK) phosphorylation but also costimulation-dependent mitogen-activated protein kinases (MAPK), such as the stress-activated c-Jun N-terminal kinase (JNK).
Akt	207	AKT1	ERK	3354888	MAPK1		PMC2615084	Therefore, cellular survival under ER stress in Certgt/gt embryos involves a mechanism in which the ERK pathway is activated and the Akt, JNK, and p38 signaling pathways are suppressed.
Akt	207	AKT1	ERK	5594	MAPK1	25637688		BARD also prevented oxidative stress reflected by a reduction in stress activated proteins, including signal transducer and activator of transcription 3 (STAT3), protein kinase B (Akt), extracellular-signal-regulated kinase (ERK) and c-Jun N-terminal kinase (JNK).
Akt	207	AKT1	ERK	5594	MAPK1		PMC2064396	In ES-derived progenitor cells, shear stress activated Akt phosphorylation but suppressed ERK phosphorylation, whereas VEGF activated both Akt and ERK phosphorylation.
Akt	207	AKT1	ERK	5594	MAPK1		PMC2998511	The cytotoxic action of synthetic phospholipid analogs relies on their ability to affect specific signaling processes in the tumor cells such as the proapoptotic stress-activated protein kinase (SAPK)/c-jun-NH2-terminal kinase (JNK) pathway, the prosurvival PI3K/Akt pathway, and the mitogen-activated protein kinase (MAPK)/extracellular signal-regulated kinase (ERK) pathway [].
AKT	207	AKT1	ERK	5594	MAPK1	27284348		In addition, allicin was demonstrated to be able to significantly ameliorate the repressed phosphoinositide 3-kinase (PI3K)/AKT and cyclic adenosine monophosphate response element-binding protein (CREB)/extracellular-signal-regulated kinase (ERK) signaling pathways by H2O2, which may also be associated with the anti-oxidative stress effects of allicin.
AKT	207	AKT1	kinases ERK	5594	MAPK1		PMC3879236	In endothelial cells, shear stress was shown to trigger numerous events such as activation of the kinases ERK (extracellular signal-regulated kinases), JNK (c-jun N-terminal kinases), Src, VEGFR2 (vascular endothelial growth factor-2) and AKT (v-akt murine thymoma viral oncogene homolog) and induction of NF-kB (nuclear factor of kappa light chain gene enhancer in B cells).
v-akt murine thymoma viral oncogene homolog	207	AKT1	kinases ERK	5594	MAPK1		PMC3879236	In endothelial cells, shear stress was shown to trigger numerous events such as activation of the kinases ERK (extracellular signal-regulated kinases), JNK (c-jun N-terminal kinases), Src, VEGFR2 (vascular endothelial growth factor-2) and AKT (v-akt murine thymoma viral oncogene homolog) and induction of NF-kB (nuclear factor of kappa light chain gene enhancer in B cells).
Akt	207	AKT1	p38	5594	MAPK1		PMC5328787	Recent studies have stressed the important role of chemokine CXCL12 (C-X-C motif Ligand 12) in enhanced survival and regeneration of pancreatic β-cells.) CXCL12 binds to the CXC receptor 4 (CXCR4) and 7 (CXCR7), initiating signal transduction that elicits a variety of biological responses.) The main signaling pathways that are upregulated downstream of CXCL12 are phosphatidylinositol 3 kinase/Akt…
Akt	207	AKT1	ERK	5594	MAPK1		PMC4575108	One report also showed that PI3K/Akt inactivation could mediate ER-stress-induced ERK activation [].
AKT	207	AKT1	Raf-ERK	5594	MAPK1		PMC2696754	Once active, EGFR is phosphorylated to initiate a series of biochemical signalling events, which diverge to activate the phosphatidylinositol 3-kinase AKT (PI3K-AKT) pathway, the Ras-Raf-extracellular signal-regulated kinase (Ras-Raf-ERK) pathway and the stress-activated protein kinase pathway.
AKT	207	AKT1	Raf-ERK	5594	MAPK1		PMC2696754	Once active, EGFR is phosphorylated to initiate a series of biochemical signalling events, which diverge to activate the phosphatidylinositol 3-kinase AKT (PI3K-AKT) pathway, the Ras-Raf-extracellular signal-regulated kinase (Ras-Raf-ERK) pathway and the stress-activated protein kinase pathway.
PKCalpha	5578	PRKCA	ERK	5594	MAPK1	16149053		To study the involvement of stress-responsive signalling proteins during these changes, the activities of protein kinase C alpha (PKCalpha) and three mitogen-activated protein kinases (MAPKs)--c-Jun NH2-terminal kinase (JNK), extracellular signal-regulated protein kinase (ERK), and p38 MAPK--were examined using immunoblotting and immune complex kinase assays.
Akt	207	AKT1	SAPK2	5600	MAPK11	12771803		Primary culture rodent bladder SMC or cardiac myofibroblasts were subjected to cyclic stretch-relaxation in the absence or presence of pharmacologic inhibitors of the phosphoinositide-3-kinase, (PI3K)/Akt, extracellular signal-regulated kinase-mitogen activated protein kinase (Erk-MAPK) or the p38 stress-activated protein kinase-2 (SAPK2) pathways.
MK2	9261	MAPKAPK2	p38b	19094	MAPK11		PMC3150449	Taken together, stabilisation, localisation and activation of MK2 by p38b are required for a proper stress response.
AKT	207	AKT1	P-p38 MAPK	26416	MAPK14		PMC3709710	Antibodies against P-IKKαβ (Ser-176/180), IKKα, IκBα, P-IκBα (Ser-32), AKT, P-AKT (Ser-473), stress-activated protein kinase/c-Jun-N-terminal kinase (SAPK/JNK), P-SAPK/JNK (Thr-183/Tyr-185), c-Jun, P-c-Jun (Ser-63), P-extracellular signal regulated kinase (ERK)-1/2 (Thr-202/Tyr-204), p38 mitogen activated protein kinase (MAPK) and P-p38 MAPK (Thr-180/Tyr-182) were purchased from Cell signaling (B…
AKT	207	AKT1	p38	1432	MAPK14		PMC3709710	Antibodies against P-IKKαβ (Ser-176/180), IKKα, IκBα, P-IκBα (Ser-32), AKT, P-AKT (Ser-473), stress-activated protein kinase/c-Jun-N-terminal kinase (SAPK/JNK), P-SAPK/JNK (Thr-183/Tyr-185), c-Jun, P-c-Jun (Ser-63), P-extracellular signal regulated kinase (ERK)-1/2 (Thr-202/Tyr-204), p38 mitogen activated protein kinase (MAPK) and P-p38 MAPK (Thr-180/Tyr-182) were purchased from Cell signaling (B…
Akt	207	AKT1	p38 MAPK	26416	MAPK14		PMC4118225	The soluble vascular cell adhesion molecule/very late antigen-4 signalling pathway may also induce migration of Sca-1POS cells and prevent CMC death from oxidative stress through activation of Akt, extracellular signal-regulated kinase (ERK), and p38 MAPK [].
AKT	207	AKT1	p38	26416	MAPK14		PMC3198158	Interestingly, it has been described that upon endoplasmic reticulum stress or proapoptotic signals, p38 promotes survival of skin macrophages through direct activation of AKT by MK2 ().
anti-phospho-Akt	207	AKT1	anti-p38 MAPK	26416	MAPK14		PMC3876969	The primary antibodies used were as follows: anti-Bax, anti-Bcl-2, anti-phospho-stress-activated protein kinase/c-Jun N-terminal kinase (SAPK/JNK, Thr183/Tyr185), anti-SAPK/JNK, anti-phospho-Akt, anti-Akt, anti-phospho-p38 mitogen activated protein kinase (MAPK), and anti-p38 MAPK (Cell Signaling Technology Inc., Danvers, MA, USA).
anti-Akt	207	AKT1	anti-p38 MAPK	26416	MAPK14		PMC3876969	The primary antibodies used were as follows: anti-Bax, anti-Bcl-2, anti-phospho-stress-activated protein kinase/c-Jun N-terminal kinase (SAPK/JNK, Thr183/Tyr185), anti-SAPK/JNK, anti-phospho-Akt, anti-Akt, anti-phospho-p38 mitogen activated protein kinase (MAPK), and anti-p38 MAPK (Cell Signaling Technology Inc., Danvers, MA, USA).
PKB	207	AKT1	p38	26416	MAPK14		PMC3556779	However, to this point, we have been unable to detect a substantial TGFβ-induced activation of the noncanonical TGFβ-signaling pathways p38 mitogen-activated protein (MAP) kinase, stress-activated protein kinase (SAPK)/Jun amino-terminal kinase (JNK), extracellular-signal-regulated kinases 1 and 2 (ERK1/2), or protein kinase B (PKB or AKT) in primary T cells (A–S5H), consistent with observations …
Akt	207	AKT1	p38	81649	MAPK14		PMC3538125	Reactive oxygen species activate different interlinked signaling pathways which can be involved in ischemic decisions about cell survival/death such as the stress-activated protein kinases, c-Jun N-terminal kinases, p38 mitogen-activated protein kinases, extracellular signal-regulated kinases, and Akt pathways [–].
AKT	207	AKT1	p38 MAPK proteins	26416	MAPK14		PMC3917270	The antibodies against AKT, Rac-1, MAPK/extracellular signal-regulated kinase (ERK) 1/2, c-Jun NH2-terminal kinase (JNK)/stress-activated protein kinase, and p38 MAPK proteins and phosphorylated proteins were purchased from Cell Signaling Technology (Beverly, MA, USA).
MAPKAPK-2	9261	MAPKAPK2	p38 MAPK	26416	MAPK14		PMC4100810	In response to stress factors, p38 MAPK (hereafter p38) can rapidly phosphorylate and activate MAP kinase-activated protein kinases (MAPKAPKs), particularly MAPKAPK-2 (hereafter MK-2) that is a direct target of p38 [].
MAPKAPK-2	9261	MAPKAPK2	p38	26416	MAPK14		PMC4100810	In response to stress factors, p38 MAPK (hereafter p38) can rapidly phosphorylate and activate MAP kinase-activated protein kinases (MAPKAPKs), particularly MAPKAPK-2 (hereafter MK-2) that is a direct target of p38 [].
MAPKAPK2	9261	MAPKAPK2	P38	26416	MAPK14		PMC2946579	Under oxidative stress conditions, P38 MAP kinase activates MAPKAPK2, which promotes translocation of mRNA-stabilizing factor HuR from the nucleus to the cytoplasmic compartment, where it stabilizes γ-GCSh mRNA by binding to the AU-rich motif located at the 3′ untranslated region.
MAPKAPK-2	17164	MAPKAPK2	p38	26416	MAPK14		PMC4200578	MAPKAPK-2 and -3 (mitogen-activated protein kinase-activated protein kinase 2 and 3) and PRAK (p38-regulated and activated kinase), located downstream of p38 MAPK, are known to phosphorylate the 27 kDa small heat-shock protein (HSP27), which has been shown to protect against ischaemic stress.
MAP kinase-activated protein kinase-2	9261	MAPKAPK2	p38 MAP kinase	1432	MAPK14	9727040		These findings demonstrate that the activation of p38 MAP kinase is involved not only in response to stress, but also in physiological signaling by gastrointestinal hormones such as CCK, where activation of Gq-coupled receptors stimulates a cascade in which p38 MAP kinase activates MAP kinase-activated protein kinase-2, resulting in Hsp 27 phosphorylation.
MAPK-activated kinases MK2	9261	MAPKAPK2	p38 MAPK	26416	MAPK14		PMC3460412	MAPK-activated kinases MK2 and MK3 are uniquely activated by p38 MAPK, whereas the mitogen- and stress-activated kinases MSK1 and MSK2 can be activated by either p38 MAPK or ERK.
MAPKAP kinases MK2	9261	MAPKAPK2	p38	1432	MAPK14	18508533		However, while MK5 is most similar in sequence to the two p38 regulated MAPKAP kinases MK2 and MK3, recent data has shown that in contrast to these enzymes MK5 is not activated in response to either cellular stress or pro-inflammatory cytokines.
Phospho-MAPKAPK-2	9261	MAPKAPK2	p38	26416	MAPK14		PMC4377312	Phospho-ATF-2 and Phospho-MAPKAPK-2 were up-regulated in p38-CA and to a lesser extent in p38-WT stable cells regardless of H2O2 stress ( and data not shown).
MK2	9261	MAPKAPK2	p38α	26416	MAPK14		PMC3270463	As a direct substrate of the stress-activated MAPK p38α and β[], MAPK-activated protein kinase 2 (MAPKAPK-2, MK2) is regulated exclusively by p38α/β [].
MAPK-activated protein kinase 2	9261	MAPKAPK2	p38α	26416	MAPK14		PMC3270463	As a direct substrate of the stress-activated MAPK p38α and β[], MAPK-activated protein kinase 2 (MAPKAPK-2, MK2) is regulated exclusively by p38α/β [].
MK2	9261	MAPKAPK2	p38	1432	MAPK14	12052889		Mitogen-activated protein kinase (MAPK)-activated protein kinase 2 (MK2) is activated upon stress by p38 MAPK alpha and -beta, which bind to a basic docking motif in the C terminus of MK2 and which subsequently phosphorylate its regulatory sites.
MK2	9261	MAPKAPK2	p38	1432	MAPK14	12052889		Mitogen-activated protein kinase (MAPK)-activated protein kinase 2 (MK2) is activated upon stress by p38 MAPK alpha and -beta, which bind to a basic docking motif in the C terminus of MK2 and which subsequently phosphorylate its regulatory sites.
MK2	9261	MAPKAPK2	p38	1432	MAPK14	18620516		Mitogen-activated protein kinase (MAPK)-activated protein kinase 2 (MK2) is activated upon stress by p38 MAPK.
MK2	9261	MAPKAPK2	p38	1432	MAPK14		PMC3164468	Rit-dependent survival involves p38-mediated Akt signaling Although stress-mediated p38 activation is commonly associated with cell death induction, recent work has identified a survival cascade in which p38 promotes MK2 kinase activation within a novel HSP27 scaffolded complex.
MK2	9261	MAPKAPK2	p38α	26416	MAPK14		PMC5442366	The p38α/β isoforms of MAPK specifically bind to and activate MAPKAPK-2 (MK2) and MAPKAPK-3 (MK3) serine/threonine kinases, members of a MAPKactivated protein kinase subfamily., Of all the kinases activated by p38α/β isoforms of MAPK, MK2 is the most important because of its key role in mediating cellular stress and inflammatory responses.
MK-2	9261	MAPKAPK2	p38	1432	MAPK14		PMC5410568	In contrast, the prolonged activation of p38 which is seen in response to cellular stresses such as glumate-induced stress and misfolded proteins accumulation stress leads to the activation of MAPK-activated protein kinase-2 (MK-2) and its substrate CREB (Chaparro-Huerta et al., ).
MAPK-activated protein kinase-2	17164	MAPKAPK2	p38	1432	MAPK14		PMC5410568	In contrast, the prolonged activation of p38 which is seen in response to cellular stresses such as glumate-induced stress and misfolded proteins accumulation stress leads to the activation of MAPK-activated protein kinase-2 (MK-2) and its substrate CREB (Chaparro-Huerta et al., ).
MK2	9261	MAPKAPK2	p38	534492	MAPK14		PMC4305097	Activation of p38 results in the production of F-actin stress fibres via MK2 and HSP27 phosphorylation (Shi et al. ).
MK2	17164	MAPKAPK2	p38	26416	MAPK14		PMC2643011	Activation of p38 MAP kinase by mechanical ventilation results in phosphorylation of MK2 and HSP25 leading to disassociation of monomeric actin from HSP25 and actin stress fiber formation mediated vascular permeability.
MK2	9261	MAPKAPK2	p38	26416	MAPK14		PMC4491660	Of these inhibitors, butyramide 4 was reported to act by blocking p38-MK2 docking, thus preventing the activation of MK2 by phospho-p38 [] but in WS cells caused a stressed morphology and permanent cell cycle arrest [] by a pathway that appeared not to involve MK2 inhibition [].
MAPKAPKs MK2	9261	MAPKAPK2	p38 MAPK	26416	MAPK14		PMC4546416	Introduction MAPK-activated protein kinase 5 (MAPKAPK5, MK5)/p38-regulated and -activated kinase (PRAK) is a distant relative of the MAPKAPKs MK2 and MK3, which are activated by p38 MAPK upon stress stimulation.
MK2	9261	MAPKAPK2	p38	81649	MAPK14		PMC2223372	As MK2 is activated downstream of p38/SAP kinase by several cellular stress stimuli (; ), it is conceivable that we observed a specific export pathway that was activated rather than inhibited by ER stress.
MK2	9261	MAPKAPK2	p38	26416	MAPK14		PMC4070940	In response to cellular stress and cytokines, MK2 is activated by p38 in a phosphorylation dependent manner.
Akt	207	AKT1	ERK-1	5595	MAPK3	28405672		For this purpose, in platelets from 72 healthy volunteers we evaluated GLP-1 receptor (GLP-1R) expression and the effects of a 15-minute incubation with the native form GLP-1(7-36), the N-terminally truncated form GLP-1(9-36) and the GLP-1 analogue Liraglutide (100 nmol/l) on: i) aggregation induced by collagen or arachidonic acid (AA); ii) platelet function under shear stress; iii) cGMP and cAMP…
Akt	207	AKT1	extracellular signal-regulated kinase-1	5595	MAPK3	21892609		HGF stimulated c-Met and Akt phosphorylation, but did not affect the phosphorylation of extracellular signal-regulated kinase-1/2 or stress-activated protein/c-jun N-terminal kinase.
Akt	24185	AKT1	p44	50689	MAPK3		PMC4506371	Antibodies to phospho-p44/42 [p-extracellular signal-regulated protein kinase 1/2 (p-ERK1/2)], p44/42 (T-ERK1/2), phospho-p38 (p-p38), p38 (T-p38), phospho-SAPK (phospho-stress-activated protein kinase)/c-Jun N-terminal kinase (p-JNK), SAPK/JNK (T-JNK), phospho-phosphoinositide 3-kinase (phospho-PI3K; p-p85), PI3K (T-p38), phospho-mitogen-activated protein kinase kinase (p-MEK1/2), MEK1/2 (T-MEK1…
Akt	24185	AKT1	p44	50689	MAPK3		PMC4506371	Antibodies to phospho-p44/42 [p-extracellular signal-regulated protein kinase 1/2 (p-ERK1/2)], p44/42 (T-ERK1/2), phospho-p38 (p-p38), p38 (T-p38), phospho-SAPK (phospho-stress-activated protein kinase)/c-Jun N-terminal kinase (p-JNK), SAPK/JNK (T-JNK), phospho-phosphoinositide 3-kinase (phospho-PI3K; p-p85), PI3K (T-p38), phospho-mitogen-activated protein kinase kinase (p-MEK1/2), MEK1/2 (T-MEK1…
Akt	207	AKT1	ERK1	5595	MAPK3		PMC3995148	Oxygen free radicals phosphorylate several important cytoprotective kinases, including extracellular signal-regulated kinase (ERK1/2), mitogen activated protein kinase (MAPK), and Akt, and are involved in the upregulation of several cytoprotective genes []. ROS are attractive signaling candidates to account for preconditioning in the kidney because renal cells are subject to obligatory bursts of …
Akt	207	AKT1	ERK1	5595	MAPK3		PMC5566318	Inhibitory effect of AuNPs on HG-induced activation of ERK1/2MAPK/Akt, NF-κB and pro-inflammatory mediators in macrophages The ERK1/2MAPK/Akt-mediated signaling pathway was investigated to understand the possible mechanisms involved in the inhibitory effect of AuNPs on HG-induced oxidative-nitrosative stress in macrophages.
Akt	207	AKT1	ERK1	5595	MAPK3		PMC5566318	Inhibitory effect of AuNPs on HG-induced activation of ERK1/2MAPK/Akt, NF-κB and pro-inflammatory mediators in macrophages The ERK1/2MAPK/Akt-mediated signaling pathway was investigated to understand the possible mechanisms involved in the inhibitory effect of AuNPs on HG-induced oxidative-nitrosative stress in macrophages.
Akt	207	AKT1	ERK5	114509	MAPK7		PMC5547215	Together these results suggest MEK5-ERK5 signaling modulates ER stress-mediated apoptosis via the PI3-kinase-Akt pathway.
Akt	207	AKT1	ERK5	114509	MAPK7		PMC5547215	It was previously shown ERK5 regulates Akt activation, () and that the PI3K/Akt pathway protects against ER stress-induced apoptosis via GRP78 regulation ().
AKT	11651	AKT1	JNK	5599	MAPK8		PMC5523074	We expected that inhibition of AKT was too required to intercede an intrication between Par-4 and ER stress/JNK in p21 regulation by 3-AWA.
Akt-1	207	AKT1	JNK	5599	MAPK8		PMC3326562	Furthermore, siRNA inhibition of either Akt-1 or c-FLIP enhanced α-TEA-induced endoplasmic reticulum stress and endoplasmic reticulum stress-mediated upregulation of JNK/CHOP/DR5, indicating that suppression of prosurvival mediators by TAM + α-TEA may enhance α-TEA-induced endoplasmic reticulum stress-mediated JNK/CHOP/DR5, at least in part, via downregulation of activated Akt, which subsequently…
Akt	207	AKT1	JNK	5599	MAPK8	16343492		The aim of this study was to estimate activation of JNK and ER stress, role of ethanol metabolism on the activation, and association of JNK with Akt under acute ethanol loading using the perfused rat liver system.
Akt	207	AKT1	c-jun N-terminal kinase	5599	MAPK8	21892609		HGF stimulated c-Met and Akt phosphorylation, but did not affect the phosphorylation of extracellular signal-regulated kinase-1/2 or stress-activated protein/c-jun N-terminal kinase.
Akt	207	AKT1	c-Jun N-terminal kinase	5599	MAPK8	25637688		BARD also prevented oxidative stress reflected by a reduction in stress activated proteins, including signal transducer and activator of transcription 3 (STAT3), protein kinase B (Akt), extracellular-signal-regulated kinase (ERK) and c-Jun N-terminal kinase (JNK).
AKT	11651	AKT1	JNK	5599	MAPK8		PMC4279438	In fact, the absence of eIF-2α phosphorylation, IRE-1 phosphorylation and CHOP induction suggest that induction of JNK phosphorylation during DEPTOR silencing is not due to ER stress but mediated by an independent mechanism, possibly secondary to AKT down-regulation as it has been previously reported [] that AKT negatively regulates the ASK-1/JNK cascade.
Akt	207	AKT1	p54 isoform of c-jun N-terminal kinase-stress-activated kinase	5599	MAPK8	11027273		The p54 isoform of c-jun N-terminal kinase-stress-activated kinase (JNK- SAPK) coimmunoprecipitated with Akt from me-v macrophages, and treatment of me-v cells with the specific phosphatidylinositol 3-kinase inhibitor LY294002 decreased cell survival, Akt and JNK kinase activities, ets-2 phosphorylation, and Bcl-x mRNA expression.
Akt	207	AKT1	c-Jun N-terminal kinase	5599	MAPK8	24055897		We assessed whether AEDs modulate pro-survival/pro-apoptotic pathways, such as extracellular-regulated kinase (ERK1/2), Akt and stress activated protein kinase/c-Jun N-terminal kinase (SAPK/JNK).
Akt	207	AKT1	JNK	5599	MAPK8	24055897		We assessed whether AEDs modulate pro-survival/pro-apoptotic pathways, such as extracellular-regulated kinase (ERK1/2), Akt and stress activated protein kinase/c-Jun N-terminal kinase (SAPK/JNK).
Akt	207	AKT1	JNK	5599	MAPK8	29017174		The non-participation of the PI3K/Akt pathway, associated with the participation of the JNK pathway, oxidative stress, and changes in energy metabolism, suggests that cardiac remodeling induced by RA supplementation is deleterious.
Rac-type small GTPase	207	AKT1	c-Jun N-terminal kinase	5599	MAPK8	20008556		The Caenorhabditis elegans Ste20-related kinase and Rac-type small GTPase regulate the c-Jun N-terminal kinase signaling pathway mediating the stress response.
Akt	11651	AKT1	JNK	5599	MAPK8		PMC3191028	HBx-induced inflammatory stress is associated with impairment in Akt phosphorylation, which was partially mediated by the JNK pathway in hepatocytes (). JNK is known to induce serine phosphorylation of IRS-1 and thereby reduce the activity of IRS-1 and also its downstream target, Akt.
AKT	207	AKT1	JNK	5599	MAPK8		PMC4499569	In the process, the activated AKT interacts with several mediators like JNK, FoxO, GSK3β, etc., thereby to render neuroprotection by limiting apoptosis, preventing microglia activation and neuroinflammation, preventing ROS accumulation and by keeping oxidative stress levels under check.
PKB/Akt	11651	AKT1	JNK	5599	MAPK8		PMC3533737	Moreover, different cytoplasmic signal transduction cascades appear to be affected by HBx, including the stress-activated protein kinases/NH2-terminal-Jun kinase (SAPK/JNK), extracellular signal-regulated kinase (ERK), protein kinase B (PKB/Akt), Ras-Raf-mitogen-activated protein kinase (Ras-Raf-MAPK), the Janus kinase/STAT (JAK/STAT), and the adhesion kinase (FAK) and proline-rich tyrosine kinas…
Akt	207	AKT1	cytokine-induced JNK	5599	MAPK8	26082006		Activation of PI3K/Akt signaling can inhibit stress- and cytokine-induced JNK activation through Akt antagonizing and the formation of the JIP1-JNK module, as well as the activities of upstream kinases ASK1, MKK4/7 and MLK.
Akt	207	AKT1	JNK	5599	MAPK8		PMC420486	On the contrary, key proteins, such as stress activated protein kinase (SAPK) or Jun-N-terminal kinase (JNK), the 38 kDa mitogen activated kinase (p38 MAPK), and Akt or protein kinase B, involved in two alternative mitogen activated protein kinases (MAPK) pathways and the phosphoinositide-3-phosphate kinase (PI3K) pathway, respectively, showed no change in activation in PLCδ4 overexpressing cells…
AKT	207	AKT1	JNK	5599	MAPK8		PMC3917270	The antibodies against AKT, Rac-1, MAPK/extracellular signal-regulated kinase (ERK) 1/2, c-Jun NH2-terminal kinase (JNK)/stress-activated protein kinase, and p38 MAPK proteins and phosphorylated proteins were purchased from Cell Signaling Technology (Beverly, MA, USA).
Akt	207	AKT1	JNK	5599	MAPK8		PMC2650710	SAPK/JNK (stress activated protein kinase/c-JUN N-terminal Kinase), Bad, MKK3/6, and Akt were uniformly expressed with no expression differences regardless of treatment.
Akt1	11651	AKT1	JIP-1	19099	MAPK8IP1		PMC4374771	Akt1 inhibited JIP-1 mediated potentiation of JNK, and therefore it has been proposed that Akt1 binding to JIP-1 acts as a regulatory gate preventing the activation of JNK, which is phosphorylated under conditions of cellular stress such as excitotoxic injury [].
Akt	207	AKT1	SAPK	5601	MAPK9		PMC2773776	Until now, the PI3K/Akt pathway, the mitogen-activated protein kinase (MAPK)/extracellular signal-regulated kinase (ERK) pathway, the stress activated protein kinase (SAPK)/Jun-N terminal kinase (JNK) and the sphingolipid pathway have been identified as important drug targets [-].
Akt	207	AKT1	SAPK	5601	MAPK9	11027273		The p54 isoform of c-jun N-terminal kinase-stress-activated kinase (JNK- SAPK) coimmunoprecipitated with Akt from me-v macrophages, and treatment of me-v cells with the specific phosphatidylinositol 3-kinase inhibitor LY294002 decreased cell survival, Akt and JNK kinase activities, ets-2 phosphorylation, and Bcl-x mRNA expression.
Akt	207	AKT1	SAPK	5601	MAPK9	24055897		We assessed whether AEDs modulate pro-survival/pro-apoptotic pathways, such as extracellular-regulated kinase (ERK1/2), Akt and stress activated protein kinase/c-Jun N-terminal kinase (SAPK/JNK).
PKB/Akt	11651	AKT1	SAPK	5601	MAPK9		PMC3533737	Moreover, different cytoplasmic signal transduction cascades appear to be affected by HBx, including the stress-activated protein kinases/NH2-terminal-Jun kinase (SAPK/JNK), extracellular signal-regulated kinase (ERK), protein kinase B (PKB/Akt), Ras-Raf-mitogen-activated protein kinase (Ras-Raf-MAPK), the Janus kinase/STAT (JAK/STAT), and the adhesion kinase (FAK) and proline-rich tyrosine kinas…
PKB	207	AKT1	SAPK	5601	MAPK9		PMC3556779	However, to this point, we have been unable to detect a substantial TGFβ-induced activation of the noncanonical TGFβ-signaling pathways p38 mitogen-activated protein (MAP) kinase, stress-activated protein kinase (SAPK)/Jun amino-terminal kinase (JNK), extracellular-signal-regulated kinases 1 and 2 (ERK1/2), or protein kinase B (PKB or AKT) in primary T cells (A–S5H), consistent with observations …
Akt	207	AKT1	SAPK	5601	MAPK9		PMC2650710	SAPK/JNK (stress activated protein kinase/c-JUN N-terminal Kinase), Bad, MKK3/6, and Akt were uniformly expressed with no expression differences regardless of treatment.
PDK1	5170	PDPK1	SAPK	5601	MAPK9		PMC3616065	In contrast, S6 protein can be phosphorylated not only through the mTOR pathway – by p70S6 kinase –, but also by other signaling pathways, such as PDK1, MAPKs and stress activated protein kinase (SAPK) .
Akt	11651	AKT1	mSIN1	79109	MAPKAP1		PMC4627286	A physical association between the mTORC2-specific component, mSIN1 (mammalian stress-activated protein kinase-interacting protein 1) and SGK1 is shown to be important for the mTORC2-mediated phosphorylation of SGK1 and its activation, which appears to be distinct from Akt, since Akt does not bind to mSIN1, raising the possibility that mTORC2 could selectively associate with its substrates and re…
Akt	207	AKT1	SIN1	79109	MAPKAP1	25456951		Mammalian stress-activated protein kinase interacting protein 1 (SIN1), an essential subunit of the mTORC2 complex, maintains the integrity of the complex and substrate specificity and regulates Akt activation.
Akt	207	AKT1	stress-activated protein kinase interacting protein 1	79109	MAPKAP1	25456951		Mammalian stress-activated protein kinase interacting protein 1 (SIN1), an essential subunit of the mTORC2 complex, maintains the integrity of the complex and substrate specificity and regulates Akt activation.
PKB	207	AKT1	MAPKAP-K2	9261	MAPKAPK2	9806907		Thus the activation of PKB by oxidative stress or heat shock is mediated by PI 3-kinase and not by MAPKAP-K2.
MK2	9261	MAPKAPK2	dMK2	44573	MAPKAPK3		PMC3499388	(A) Functional interaction between dMK2 and Polyhomeotic in vitro: stress signaling-induced interaction of EGFP-tagged dMK2 (Drosophila ortholog of MK2/3) and Myc-tagged Ph (Drosophila ortholog of PHC1/2) in S2 cells.
Akt	207	AKT1	p38 stress-activated protein kinase	8550	MAPKAPK5	10910920		We show that exposure of immature MoDCs to LPS activates the p38 stress-activated protein kinase (p38SAPK), extracellular signal-regulated protein kinase (ERK), phosphoinositide 3-OH kinase (PI3 kinase)/Akt, and nuclear factor (NF)-kappaB pathways.
Akt	207	AKT1	DBL	4168	MCF2	23959789		Furthermore, DBL activated stress-associated kinases such as Akt, ERK, and p38 MAPK, and PI3K or Akt inhibitors, but not ERK, p38, or JNK inhibitors, diminished DBL-induced glutathione synthesis and protection against 6-OHDA.
Akt	207	AKT1	DBL	4168	MCF2	23959789		Furthermore, DBL activated stress-associated kinases such as Akt, ERK, and p38 MAPK, and PI3K or Akt inhibitors, but not ERK, p38, or JNK inhibitors, diminished DBL-induced glutathione synthesis and protection against 6-OHDA.
Akt	207	AKT1	Mcl-1	4170	MCL1		PMC3256233	Lastly, we studied the upstream signaling pathways leading to infection-mediated Mcl-1 induction and identified components of the MAP/ERK, PI3K/Akt and GADD153 in the endoplasmic reticulum (ER) stress pathways as potential modulators.
AKT	207	AKT1	MDM2	4193	MDM2		PMC3759859	Therefore, AKT-mediated activation of MDM2, a negative regulator of p53, can have a significant impact on UV stress responses by preventing p53-mediated cell cycle arrest and apoptosis induction () [,].
AKT	207	AKT1	Mdm2	4193	MDM2		PMC5617424	Additionally, AKT negatively regulates Mdm2 expression during abnormal stress and promotes tumorigenesis []. Recently, Chen et al. reported that AKT2 rs7254617 increased prostate cancer risk [].
Akt	207	AKT1	Mer	17289	MERTK		PMC3418318	Mer is also involved in the regulation of Akt and ERK for the promotion of macrophage survival after exposure to oxidative stress ().
Akt	207	AKT1	miR-1	406980	MIR19B1	22806319		Insulin ameliorates miR-1-induced injury in H9c2 cells under oxidative stress via Akt activation.
Akt	207	AKT1	MLIP	90523	MLIP	26359501		Together, these results revealed that MLIP is required for normal myocardial adaptation to stress through integrated regulation of the Akt/mTOR pathways.
AKT	207	AKT1	MMP-1	4312	MMP1		PMC4438667	In this study, we demonstrate that high fluid shear stress induces the synthesis and crosstalk of COX-2, IL-1β and FGF-2, resulting in the rapid (2 h) and transient synthesis of PGE2 that activates the PI3-K/AKT-, p38-dependent NF-κB- and c-Jun-transactivating signaling pathways, which are ultimately responsible for MMP-1 activation at 12 h.
Rac	207	AKT1	MMP1	4312	MMP1		PMC2941746	For example, Rac is required for shear stress-induced matrix metalloproteinase 9 (MMP9) expression in chondrocytes [], and activated Rac can induce expression of the MMP1 in fibroblasts [].
PKB	207	AKT1	MMP-12 deletion	4321	MMP12		PMC4731752	MMP-12 deletion inhibited HFD-induced oxidative stress and downstream phosphorylation of Akt/PKB and ERK1/2 signaling pathways in glomeruli.
Akt	207	AKT1	MMP-12 deletion	4321	MMP12		PMC4731752	MMP-12 deletion inhibited HFD-induced oxidative stress and downstream phosphorylation of Akt/PKB and ERK1/2 signaling pathways in glomeruli.
Rac	207	AKT1	MMP9	4318	MMP9		PMC2941746	For example, Rac is required for shear stress-induced matrix metalloproteinase 9 (MMP9) expression in chondrocytes [], and activated Rac can induce expression of the MMP1 in fibroblasts [].
DNA-PK	5591	PRKDC	Herpes simplex virus protein ICP0	17528	MPZ		PMC2627925	Herpes simplex virus protein ICP0 has been well characterized, and induces proteasome-dependent degradation of the stress-related kinase DNA-PK and promyelocytic leukemia protein ,.
Akt	11651	AKT1	myostatin	2660	MSTN		PMC2856679	Similar to was observed with cardiomyocyte size, PE stress did not induce additional activation of Akt and NFAT3 in combination with myostatin inhibition, but myostatin overexpression did block PE-induced activation of these pathways.
Akt	207	AKT1	mTOR	2475	MTOR	22444729		Likewise, chronic ER stress obstructs activation of Akt by mTOR complex 2.
Akt	207	AKT1	mTOR	2475	MTOR	23041259		In this study, we show that inactivated Akt induces ER stress-independent autophagy via mTOR suppression in patient fibroblasts.
Akt	207	AKT1	mTOR	2475	MTOR	20230819		Inhibition of PI3K or mTOR/p70S6K by wortmannin and rapamycin, respectively, increased apoptosis and inhibited phosphorylation of Akt and p70S6K induced by single-dose oxidative stress.
Akt	207	AKT1	mTOR	2475	MTOR		PMC3824660	Although the molecular mechanisms whereby autophagy mediates its effects on both normal and cancer cells are far from complete, various signaling pathways have been implicated in the upregulation or downregulation of autophagy., The phosphatidylinositol 3-kinase/mammalian target of rapamycin (PI3K/mTOR) and AMP-activated protein kinase (AMPK) signaling pathways have emerged as the central conduit…
Akt	207	AKT1	mTOR	2475	MTOR		PMC4571837	Furthermore, Akt also regulates the development of cardiac hypertrophy in adulthood through activation of mTOR and its effector proteins, S6 and 4EBP1.– Therefore, the Akt pathway has been implicated in the stimulation of cardiomyocyte growth and survival during the response of the heart to stress.
PKB	207	AKT1	mTOR	2475	MTOR		PMC4502526	However, in the presence of rapamycin, vascular endothelial growth factor, tumor necrosis factor and insulin (like shear stress) failed to phosphorylate Akt/PKB, supporting the contention that mTOR regulates Akt/PKB activation in endothelial cells as reported .
Akt	207	AKT1	mTOR	2475	MTOR		PMC4502526	However, in the presence of rapamycin, vascular endothelial growth factor, tumor necrosis factor and insulin (like shear stress) failed to phosphorylate Akt/PKB, supporting the contention that mTOR regulates Akt/PKB activation in endothelial cells as reported .
Akt	11651	AKT1	mTOR	56718	MTOR		PMC3484151	Inhibition of PI3K or mTOR/p70S6K by wortmannin and rapamycin, respectively, increased apoptosis and inhibited phosphorylation of Akt and p70S6K induced by oxidative stress .
Akt	207	AKT1	mTOR	2475	MTOR		PMC3789817	Notably, phosphorylation of mTOR at Ser2448, which is regulated by amino acid availability/energy status , Akt , and cellular damage stress was low, indicating that mTOR activity is impaired in RBS cells.
PKB	207	AKT1	mTOR	2475	MTOR		PMC5337354	Meanwhile, mTOR modulates autophagy, increases mitochondrial clearance and protects cardiomyocytes from oxidative stress-induced toxicity [, ] through the activation of protein kinase B (PKB) [].
Akt	207	AKT1	mTOR	2475	MTOR		PMC5233819	Early phosphorylation of Akt possibly mediated the activation of mTOR complex 1 (mTORC1) by ER stress.
AKT	207	AKT1	MVP	78388	MVP		PMC3875758	Figure 3 MVP-mediated upregulation of the PI3K/AKT/mTOR pathway promotes migration and starvation resistance in human GBM cells Vaults have been shown to interact with several intracellular signal cascades including the PI3K/AKT/mTOR pathway known to exert important roles in survival of diverse stress conditions and cell migration [, ].
Akt	207	AKT1	Visfatin	10135	NAMPT	19898975		Visfatin induces oxidative stress in differentiated C2C12 myotubes in an Akt- and MAPK-independent, NFkB-dependent manner.
Akt	207	AKT1	AIB1	8202	NCOA3	16877447		In contrast, high-level AIB1 production prevents proapoptotic activation of the JNK/c-Jun signal transduction pathway and induces DNA replication through phosphorylation of the Akt/p65 NF-kappaB subunit RelA under cellular stresses such as UV irradiation or serum deprivation.
Akt	207	AKT1	Ncs1	23413	NCS1	27555477		Activation of stress-induced Ca2+-dependent survival pathways, such as Akt and PGC-1α (which promotes mitochondrial biogenesis and function), was diminished in Ncs1-/- hearts.
AKT	207	AKT1	Ndrg2	515063	NDRG2		PMC3854405	Using a set of kinase inhibitors, we found that AKT-mediated hyperthermia induced Ndrg2 phosphorylation, while the AKT inhibitor suppressed Ndrg2 phosphorylation and enhanced heat stress-induced apoptosis during the early stage of hyperthermia ( and ).
Akt	207	AKT1	NDRG2	515063	NDRG2		PMC4581762	Overexpression of NDRG2 in malignant breast cancer cells was reported to inhibit Akt phosphorylation as well as induce p38 mitogen-activated protein kinase and stress-activated protein kinase/c-Jun N-terminal kinase phosphorylation (). Meanwhile, Janus kinase 2 or signal transducer and activator of transcription 3 activation in resting and insulin-like growth factor-stimulated cells was inhibited…
Akt	207	AKT1	Nrf2	4780	NFE2L2	29154192		These results indicate that the attenuation of T1D-induced testicular oxidative stress and apoptosis by RSV treatment was mainly related to Akt-mediated Nrf2 activation via p62-dependent Keap1 degradation.
Akt	207	AKT1	Nrf2	4780	NFE2L2	27923643		The present results showed that, at low concentrations, pretreatment with BME triggered stress response by causing ROS production, then, activated survival-promoting signals via ERK and Akt activated Nrf2/HO-1 signaling pathway, resulting in decrease in cytotoxicity induced by the OGD.
Akt	207	AKT1	Nrf2	4780	NFE2L2	27885462		These results suggest that ECQ exerts a cytoprotective effect against H2O2-induced oxidative stress by upregulation of Nrf2/HO-1 via the PI3 K/Akt pathway.
AKT	207	AKT1	Nrf2	4780	NFE2L2	28694916		Moreover, IAA treatment protected hDPSCs against H2O2-induced oxidative stress via increased expression of Nrf2 and HO-1, mediated by the AKT pathway.
Akt	207	AKT1	Nrf2	360149	NFE2L2		PMC4981604	The MAPK, ERK, and PI3K/Akt pathways can all activate nuclear factor E2-related factor 2 (Nrf2) signaling, which pathway coordinates the enhanced expression of a large number of prosurvival genes that allows neurons to respond to various conditions of stress, including OS ().
AKT	207	AKT1	Nrf2	4780	NFE2L2		PMC5488230	In conclusion, we demonstrated that IAA treatment protected hDPSCs against H2O2-induced oxidative stress via increased expression of Nrf2 and HO-1, mediated by the AKT pathway ().
Akt	11651	AKT1	Nrf 2	18024	NFE2L2		PMC4106155	Therefore, these results show that the PI3K/Akt pathway partially regulates Nrf 2 translocation, which is consistent with a prior finding in H9c2 cardiomyocytes [], thereby regulating oxidative stress and inflammation.
Akt	207	AKT1	nuclear factor erythroid-2-related factor 2	83619	NFE2L2		PMC5421141	In addition, Danshensu (1 and 10 µM) [] and the extract of S. miltiorrhiza (29.76 or 59.52 mg/kg for 5 days by gavage) [] treatment contributed to the recovery of cardiac function after MI, and the tolerance of heart against MI injury by improving coronary flow, heart rate and left ventricular developed pressure, and the recovery of ± dp/dtmax as well as reducing infarct sizes via inhibiting oxid…
Akt	207	AKT1	nuclear factor erythroid 2-related factor 2	4780	NFE2L2		PMC5488237	The induction of HO-1 under oxidative stress is mainly activated by the transcription factor nuclear factor erythroid 2-related factor 2 (Nrf2), which is regulated by the mitogen-activated protein kinase (MAPK), phosphoinositide 3-kinase (PI3k)/Akt, and protein kinase C (PKC) signaling pathways [–].
AKT	207	AKT1	transcription factor Nrf2	497024	NFE2L2		PMC5325331	Senescence-related hyperglycemia is associated with increased oxidative stress via MAPKs []. Moreover, the transcription factor Nrf2 is activated by upstream kinases including PI3K/AKT, PKC, JNK/SAPK, ERK1/2 and p38 MAPK [].
Akt	207	AKT1	NF-kappaB	4790	NFKB1	19056378		Akt-dependent NF-kappaB activation is required for bile acids to rescue colon cancer cells from stress-induced apoptosis.
Akt1	280991	AKT1	p50	4790	NFKB1		PMC2954122	Importantly, the activation of Akt1 in response to mitochondrial respiratory stress involves the same four signature factors (C/EBPδ, c-Rel/p50, NFAT, and CREB) and recruitment of hnRNPA2.
AKT	207	AKT1	eNOS	4846	NOS3		PMC5019908	Several studies have demonstrated that the phosphoinositide 3-kinase- (PI3K-) AKT pathway is mainly responsible for eNOS phosphorylation at Ser1177 especially in response to shear stress and VEGF [–].
Akt	207	AKT1	NOS3	4846	NOS3	18931031		Akt activates NOS3 and separately restores barrier integrity in H2O2-stressed human cardiac microvascular endothelium.
Akt	207	AKT1	eNOS	4846	NOS3		PMC3564533	However, PI 3-kinase inhibitors also block shear stress–induced integrin activation, suggesting that PI 3-kinase inhibitors may similarly block downstream activation of PKA in cells on basement membrane proteins (). Dominant-negative Akt blocks VEGF-induced eNOS phosphorylation but not shear stress–induced eNOS phosphorylation, whereas the PKA inhibitor H89 blocks shear stress–induced eNOS phosph…
Akt	207	AKT1	eNOS-S(1179)	4846	NOS3	11729190		Expression of Akt(AA) or Akt(AAA) in BAEC by using recombinant adenoviral constructs inhibited phosphorylation of eNOS-S(1179) if cells were stimulated by vascular endothelial growth factor (VEGF), but not by shear stress.
Akt	207	AKT1	eNOS-S(1179)	4846	NOS3	11729190		Expression of Akt(AA) or Akt(AAA) in BAEC by using recombinant adenoviral constructs inhibited phosphorylation of eNOS-S(1179) if cells were stimulated by vascular endothelial growth factor (VEGF), but not by shear stress.
AKT	207	AKT1	endothelial eNOS	4846	NOS3		PMC4288365	Increased nitric oxide generation contributes to neutralize O2− in stressed cells [], and the endothelial eNOS activation is also regulated in an AKT-independent manner [].
Akt	207	AKT1	eNOS	4846	NOS3	14627548		Western blot analysis for phosphorylated ERK1/2, Akt, p38 mitogen activated protein kinase (MAPK), and eNOS showed that shear stress rapidly increased phosphorylation of ERK1/2 and Akt but not of p38 MAPK.
Akt	207	AKT1	eNOS	4846	NOS3		PMC4588456	In addition, the presence of and eNOS -786 allele was related to a increase in the risk of grade 3 HTN . 3.1 Oxidative stress The shear stress-induced activation of eNOS seems to be dependent on the activation of the PI3K/Akt pathway .
Akt	24185	AKT1	eNOS	4846	NOS3		PMC3191806	Experiments to inhibit the PI3-kinase/Akt pathway, by Akt1/2, PI-103 and wortmannin suggested that laminar shear stress-induced eNOS phosphorylation is dependent on Akt in GEnC, further supported by the blockade of increased NO production in response to laminar shear stress by Akt inhibition.
Akt	207	AKT1	eNOS	4846	NOS3		PMC4641627	For example, shear-stress-mediated eNOS activation indicates that eNOS phosphorylation induced by Akt was a typical Ca2+-dependent regulatory mechanism for activation of eNOS [].
PKB	207	AKT1	eNOS	4846	NOS3		PMC4641627	Studies of VEGF and shear-stress-mediated phosphorylation of eNOS indicated that the serine/threonine protein kinase Akt/PKB mediates the activation of eNOS, leading to increase NO production [].
Akt	11651	AKT1	eNOS	4846	NOS3		PMC2866668	eNOS phosphorylation at serine 1177 is mediated by Akt , which has been extensively shown to be modulated by oxidative stress.
AKT	207	AKT1	eNOS	4846	NOS3	24251665		eNOS phosphorylation on Ser-1177 (positive regulatory site), eNOS interactions with heat-shock protein 90 (HSP90) (positive regulator), phosphorylated AKT (upstream mediator of eNOS phosphorylation on Ser-1177), an NADPH oxidase catalytic subunit gp91(phox), and a marker of oxidative stress (4-hydroxy-2-nonenal [HNE]) were measured by Western blot.
AKT	207	AKT1	NPM1	4869	NPM1		PMC4513283	This evidence suggests that NPM1 is strongly associated with the MAPK and PI3K/AKT pathways for ribosome biogenesis, and it may play a critical role in 1) monitoring the stress experienced by the cell and 2) modulating the molecular mechanisms related to cell growth, proliferation and survival.
Akt	207	AKT1	Tat-NQO1 protein	24314	NQO1		PMC5346322	Effects of Tat-NQO1 protein on H2O2-induced activation of Akt, MAPK and caspase-3 Several studies have shown that Akt and MAPK signaling pathways are associated with ROS, get activated by oxidative stress, and eventually lead to cell death (, ).
DNA-PK	5591	PRKDC	NR1D1	9572	NR1D1		PMC3594312	Thus, it could be that NR1D1 is induced under heat stress by DNA-PK to promote cell metabolism for survival.
AKT	207	AKT1	Nur77	3164	NR4A1		PMC5041156	These findings strongly demonstrated that Nur77 regulated the ER stress by increasing intracellular levels of ROS and Ca2+ and the expression of CHOP and ATF3 mRNA and downregulating PI3K/AKT signaling pathway.
AKT	207	AKT1	NRF1	4899	NRF1		PMC4220119	Upstream regulators of the PMDS including E3 ligases such as CHIP such as HSF1, 2 or NRF1 could be activated or suppressed by the AKT stress response in a sex-dependent manner thereby differentially affecting proteostasis in peripheral and brain tissues.
Akt	207	AKT1	NRG-1	3084	NRG1	22886427		Taken together, these findings suggest that NRG-1 activates PI3K/Akt signaling and inhibits mPTP opening, and downstream apoptotic events in cardiac myocytes subjected to oxidative stress.
Akt	207	AKT1	NRG-1	3084	NRG1		PMC4709767	Oxidative stress is a common pathological hallmark of many neurological disorders and it induces oxidative damage and neurodegeneration under a variety of circumstances []. NRG-1 has been shown to protect neurons against oxidative stress initiated by different agents, such as hydrogen peroxide, organophosphates, and MPP+ [–], and it has been recognized that NRG-1 exerts this neuroprotective effec…
Akt	207	AKT1	neurotrophic factor	4908	NTF3	11862761		As well as neurotrophic factor-mediated inhibition of in vivo apoptotic mechanisms through various protein kinases including Akt and MAP kinase, we propose adding the neuronal death mode switch mechanism observed under the brain ischemic stress to the list of neuroprotective mechanisms.
ILK	3611	ILK	beta1	283111	OR51V1	12372433		We previously showed that integrin-linked kinase (ILK), which can interact with beta1 and beta3 integrins, and its interacting protein, affixin, play an essential role in the initial assembly of focal adhesion structures and actin stress fibers.
Akt	207	AKT1	OSM	5008	OSM		PMC4903004	In addition, OSM activates other signaling pathways such as phosphatidylinositol 3-kinase (PI3K/Akt) [] and the MAPK, namely, ERK1/2, p38, and c-jun N-terminal kinases/stress-activated protein kinases (JNK/SAPK) [].
Rac	207	AKT1	PAK1	5058	PAK1	10766836		In addition, these phenotypic changes were accompanied by a blockade of disassembly of focal adhesion points, stabilization of stress fibers, and enhanced cell spreading and were dependent on the presence of the kinase dead domain but independent of the presence of the Rac/cdc42 intact (Cdc42/Rac interactive binding) domain of PAK1.
Rac	207	AKT1	PAK1	5058	PAK1	10766836		In addition, these phenotypic changes were accompanied by a blockade of disassembly of focal adhesion points, stabilization of stress fibers, and enhanced cell spreading and were dependent on the presence of the kinase dead domain but independent of the presence of the Rac/cdc42 intact (Cdc42/Rac interactive binding) domain of PAK1.
AKT	207	AKT1	DJ-1	11315	PARK7	20133695		We provide evidence that DJ-1 promotes AKT phosphorylation in response to oxidative stress induced by H(2)O(2) in vitro and in vivo following 1-methyl-4-phenyl-1,2,3,6-tetrahydropyridine (MPTP) treatment.
PKB	207	AKT1	DJ-1	11315	PARK7		PMC4570748	In addition to targeting the Trx system other molecules, e.g. the inhibition of the PTEN axis [] or the protein deglycase DJ-1 (DJ-1) known to exhibit anti-oxidative and cyto-protective functions in other diseases [–] might have therapeutic potential, since DJ-1 is often upregulated in cancer cells and involved in the regulation of various redox stress responsive signaling pathways (PI3K/AKT/PKB;…
AKT	207	AKT1	DJ-1	11315	PARK7		PMC4570748	In addition to targeting the Trx system other molecules, e.g. the inhibition of the PTEN axis [] or the protein deglycase DJ-1 (DJ-1) known to exhibit anti-oxidative and cyto-protective functions in other diseases [–] might have therapeutic potential, since DJ-1 is often upregulated in cancer cells and involved in the regulation of various redox stress responsive signaling pathways (PI3K/AKT/PKB;…
Akt	207	AKT1	DJ-1	11315	PARK7		PMC3671546	After oxidative stress such as that caused by injection of a neurotoxin into mice or by addition of a neurotoxin to cultured cells, the Akt pathway is activated concomitantly with inactivation of PTEN in mouse brains and cultured cells, and the phosphorylation level of Akt is reduced in DJ-1-knockout mice, leading to neuronal cell death [–].
mitogen-activated protein kinase	3611	ILK	DJ-1	43652	PARK7		PMC4295760	DJ-1 also binds directly to ASK1 under oxidative stress and inhibits its kinase activity, resulting in the inhibition of p38 mitogen-activated protein kinase (MAPK) signalling cascade and preventing cell death signals [].
Akt	207	AKT1	PARP	142	PARP1		PMC2828125	Some reports have also demonstrated that PARP inhibitors induced the phosphorylation and activation of Akt in lipopolysaccharide-treated mice or cultured cells during oxidative stress, raising the protective effect of PARP inhibition mediated through the PI3K-kinase/Akt pathway.
Akt	207	AKT1	PARP-1	142	PARP1		PMC5094949	PARP-1 inhibition has been demonstrated to increase Akt phosphorylation in neuronal and liver cells exposed to oxidative stress [].
Akt	207	AKT1	Par-4	5074	PAWR	20814219		Par-4 gene silencing resulted in PI3K/Akt signaling-dependent inhibition of renal proximal tubular cell apoptosis following oxidative stress.
AKT	11651	AKT1	Par-4	5074	PAWR		PMC5523074	We expected that inhibition of AKT was too required to intercede an intrication between Par-4 and ER stress/JNK in p21 regulation by 3-AWA.
Akt	11651	AKT1	PDCD4	27250	PDCD4		PMC3953479	PI3K/Akt pathway is involved in degradation of PDCD4 with pulsatile shear stress.
Akt	11651	AKT1	PDGFR	18596	PDGFRB		PMC3737227	In line with these previous studies, our present data from pharmacological inhibitors showed that PDGFR inhibition attenuated Akt activation induced by mechanical stress, suggesting cross-talk between PDGFR and Akt in VSMC exposed to MS.
Akt	207	AKT1	Casein kinase	149420	PDIK1L	16274701		Casein kinase Iepsilon down-regulates phospho-Akt via PTEN, following genotoxic stress-induced apoptosis in hematopoietic cells.
Akt	207	AKT1	3-phosphoinositide-dependent protein kinase-1	18607	PDPK1		PMC4942616	Several key signaling transducers (Fig. S3) activated early (≈2 months) and in a CYP2E1-dependent manner in CHIP−/−-livers were thus identified: (i) Mitogen-activated protein kinase (MAPK) JNK, activated by pro-inflammatory cytokines and cellular stresses, (ii) energy/metabolic sensor AMPK-α1-subunit (AMPKα), activated via Thr172-phosphorylation by elevated intracellular AMP and/or ROS levels, an…
AKT-2	181524	AKT1	PDK-1	180475	PDPK1		PMC2661368	The AKT-1/AKT-2/SGK-1 complex, once all of its constituent kinases have been activated by PDK-1 , phosphorylates the DAF-16/FOXO transcription factor at sites that block its entry into the nucleus, where it would activate or repress transcription of hundreds of target genes, including many that modulate metabolism, reproduction, life span, and resistance to oxidative stresses –.
AKT-1	179424	AKT1	PDK-1	180475	PDPK1		PMC2661368	The AKT-1/AKT-2/SGK-1 complex, once all of its constituent kinases have been activated by PDK-1 , phosphorylates the DAF-16/FOXO transcription factor at sites that block its entry into the nucleus, where it would activate or repress transcription of hundreds of target genes, including many that modulate metabolism, reproduction, life span, and resistance to oxidative stresses –.
AKT/PKB	41957	AKT2	PDK-1	180475	PDPK1		PMC1413578	PDK-1 phosphorylates and activates PIP-bound AKT/PKB, which, in turn, phosphorylates downstream target proteins (). In C. elegans, all the components of this signaling pathway are conserved and function to modulate wild-type longevity, stress resistance and reproductive development.
Rac	207	AKT1	PECAM-1	5175	PECAM1		PMC3678169	We reveal differential roles for two components of the mechanosensory complex in this pathway: PECAM-1 is required for GTP loading of Rac; in contrast, VE-cadherin is not required for GTP loading, but is essential for polarized activation of Rac1 in response to shear stress.
Akt	11651	AKT1	PHLDA3	23612	phlda3		PMC4975835	Overall, our results indicate that PHLDA3 overexpression by ER stress inhibits Akt phosphorylation, which promotes hepatocyte death.
Akt kinases	207	AKT1	PHLPP isoforms	23239	PHLPP1		PMC3973230	Fyn kinase has been demonstrated to localize to the nucleus during stress and shares an inverse relationship with nuclear Nrf2 density., The PHLPP isoforms (PH domain and leucine-rich repeat protein phosphatases) regulate phosphorylation of Akt kinases at Ser473 residue.
DNA-PKcs	5591	PRKDC	PIDD	55367	PIDD1	29309644		Disruption of the interaction between DNA-PKcs and PIDD not only compromises the ATR association and regulation of DNA-PKcs, but also the ATR signaling pathway, intra-S-phase checkpoint and cellular resistance to replication stress.
Akt	207	AKT1	PI3-kinase	5289	PIK3C3		PMC3256302	It has not been tested whether this downregulation of Akt signaling in response to APF is dependent on PI3-kinase or the PTEN pathway, which is an important upstream inhibitor of Akt signaling [,]. p53-p21 Signaling Activation of the p53 pathway is stimulated by stress signals (such as DNA damage and oxidative stress) and activated oncogenes [-].
Akt	207	AKT1	PI3K	5290	PIK3CA		PMC4887645	Light stress induced the activation of PI3K (phosphatidylinositide 3-kinases), through the activation and binding of IGF-1R, which led to the activation of the Akt survival pathway in photoreceptors [].
Akt	207	AKT1	PI3K	5290	PIK3CA	18566464		Light stress induced the activation of PI3K through activation and binding of IGF-1R, which leads to activation of the Akt survival pathway in photoreceptors.
Akt	207	AKT1	PI3K	5291	PIK3CB	21205476		Endoplasmic reticulum stress-induced Akt activation is mediated through PI3K and the PI3K/Akt pathway inactivation is involved in increased ERK activity in human hepatocellular carcinoma cells.
Akt	207	AKT1	PI3K	5291	PIK3CB	11834720		Phosphatidylinositol 3-kinase (PI3K)-dependent Akt phosphorylation was found to be activated by mechanical stress and completely blocked by wortmannin (a PI3K inhibitor).
Akt	207	AKT1	PI3K	5291	PIK3CB		PMC2774458	However, it has been found that Akt is also activated independently of the PI3K by heat shock and hyperosmolarity [] as well as oxidative stress and chemical stressors [].
Akt	207	AKT1	PI3K	5291	PIK3CB	12181189		These results suggest that GCDC-induced apoptosis in cultured rat hepatocytes proceeds through a caspase-dependent intracellular stress pathway and that the survival effect of cAMP is mediated in part by PI3K-dependent Akt activation at the level of the mitochondria.
Akt	207	AKT1	PI3K	5291	PIK3CB		PMC3191806	Akt/phosphatidylinositol 3-kinase (PI3K) inhibitors inhibit laminar shear stress-induced Akt (serine 473) and eNOS (serine 1177) phosphorylation and NO production.
Akt	207	AKT1	PI3K	5291	PIK3CB		PMC4826942	We therefore hypothesize that EGCG-mediated interaction upstream of Akt, in combination with stress-mediated reduction in the activity of intracellular kinase inhibitors, can lead to complete PI3K/Akt activation and prosurvival effects in H2O2-treated cells.
Akt	207	AKT1	PI3K	5291	PIK3CB	28653224		Endothelial cells submitted to stressful conditions by blocking adhesion to substrate (anoikis resistance) display an up-regulation of Ras/ERK and PI3k/Akt pathways by high expression of Ras, ERK, PI3K (p110α) and Akt (Thr 308).
Akt	207	AKT1	PI3k	5291	PIK3CB	28653224		Endothelial cells submitted to stressful conditions by blocking adhesion to substrate (anoikis resistance) display an up-regulation of Ras/ERK and PI3k/Akt pathways by high expression of Ras, ERK, PI3K (p110α) and Akt (Thr 308).
Akt	24185	AKT1	PI3K	5291	PIK3CB		PMC3924002	The activity of FoxO is controlled by phosphorylation, acetylation, and ubiquitination (). FoxO phosphorylation is induced by insulin/IGF-1 signaling and increased cellular stress, mainly through PI3K-mediated Akt activation (). PI3K-Akt signaling plays a vital role in cell cycle arrest and cell survival.
Akt	207	AKT1	PI3K	5293	PIK3CD	20230819		Inhibition of PI3K or mTOR/p70S6K by wortmannin and rapamycin, respectively, increased apoptosis and inhibited phosphorylation of Akt and p70S6K induced by single-dose oxidative stress.
AKT	207	AKT1	PI3K	5293	PIK3CD		PMC4443728	The Role of GCN5 in Lymphoid Cells GCN5 controls the PI3K/AKT pathway activation through regulating the transcription of Btk and Syk, which are involved in PI3K/AKT pathway activation in B cells under oxidative stress.
AKT	207	AKT1	PI3K	5293	PIK3CD		PMC4443728	The Role of GCN5 in Lymphoid Cells GCN5 controls the PI3K/AKT pathway activation through regulating the transcription of Btk and Syk, which are involved in PI3K/AKT pathway activation in B cells under oxidative stress.
PKC	48311	PRKCA	PI3 kinase	42446	PIK3CD		PMC2617762	Interestingly enough, neither activation of the Phosphatidyl Inositol 3 kinase (PI3 kinase) by compound 48/80 (2 µg/ml) nor Protein Kinase C (PKC) by phorbol 12-myristate 13-acetate (5 µg/ml) did restore the capacity of a Nrf2 nuclear translocation in FRDA fibroblasts upon an oxidative stress (oligomycin treatment; not shown).
Akt	24185	AKT1	PI3K	298947	PIK3CG		PMC4732844	This protective effect involved a reduction in oxidative stress, neutrophil infiltration and pro-inflammatory effects; iv) treatment with the PI3K inhibitor, LY294002, inhibited Akt phosphorylation and the cardioprotective effects of intravenous HMGB1.
Akt	11651	AKT1	PI3K	5294	PIK3CG		PMC2653516	For example, shear stress can stimulate phosphatidylinositol 3-kinase (PI3K) activity [] which is required for Akt phosphorylation; this helps prevent endothelial apoptosis [] and contributes to endothelial nitric oxide synthase (eNOS) activation and subsequent nitric oxide (NO) production [,].
Akt	207	AKT1	PI3K	5294	PIK3CG		PMC4316742	Akt is activated by PI3K and indeed, treatment with the PI3K inhibitor LY294002 prevented the stress fibre formation, rescuing the cortical actin rim, but not VE-cadherin-positive cell junctions, in the Tie2-silenced cells ().
Akt	207	AKT1	PI3K	5294	PIK3CG	9710127		The stimulation of Akt phosphorylation by shear stress thereby seemed to be mediated by the phosphoinositide 3-OH kinase (PI3K), as evidenced by the significant inhibition of shear stress-induced Akt phosphorylation by the PI3K inhibitors wortmannin (20 nmol/L) and Ly294002 (10 micromol/L).
Akt	207	AKT1	PI3-K	5294	PIK3CG		PMC1242125	Cellular stress such as hypoxia and ultraviolet radiation has been reported by others to induce PI3-K-dependent Akt activation [-].
Akt	207	AKT1	PI3K	5294	PIK3CG	17434462		ER stress-induced Akt activation was mediated through phosphatidylinositol 3-kinase (PI3K) because the PI3K inhibitors, LY294002 and wortmannin, inhibited Akt activation.
Akt	207	AKT1	PI3K	5294	PIK3CG	17434462		ER stress-induced Akt activation was mediated through phosphatidylinositol 3-kinase (PI3K) because the PI3K inhibitors, LY294002 and wortmannin, inhibited Akt activation.
Akt	11651	AKT1	PI3K	298947	PIK3CG		PMC3484151	Inhibition of PI3K or mTOR/p70S6K by wortmannin and rapamycin, respectively, increased apoptosis and inhibited phosphorylation of Akt and p70S6K induced by oxidative stress .
Akt	11651	AKT1	PI3K	298947	PIK3CG		PMC4070642	Moreover, several studies have shown that H2O2-induced oxidative stress can trigger T308 phosphorylation for membrane-associated activation of Akt, by the PI3K dependent pathway in lymphocytes [-].
AKT	207	AKT1	PI3K	5294	PIK3CG		PMC3633886	Sensing the intracellular stress, phosphoinositide 3-kinase (PI3K) activates AKT, a serine/threonine protein kinase also known as Protein Kinase B (PKB), which leads to a series of downstream cascades and ultimately activates mTOR.
Akt	207	AKT1	PI3K	5294	PIK3CG		PMC420486	On the contrary, key proteins, such as stress activated protein kinase (SAPK) or Jun-N-terminal kinase (JNK), the 38 kDa mitogen activated kinase (p38 MAPK), and Akt or protein kinase B, involved in two alternative mitogen activated protein kinases (MAPK) pathways and the phosphoinositide-3-phosphate kinase (PI3K) pathway, respectively, showed no change in activation in PLCδ4 overexpressing cells…
AKT	11651	AKT1	PIM1	5292	PIM1		PMC5029667	Schematic of the signaling pathway activated by ribosomal stress Ribosomal stress, due to RP depletion, induces a decrease of PIM1 level that inhibits phosphorylation of AKT on Ser473; the consequent AKT inactivation causes a dephosphorylation of MDM2, inhibiting its nuclear import and ubiquitin ligase activity.
Akt	207	AKT1	PINK1	65018	PINK1	21945539		Our studies show that PINK1 is required for optimal IGF-1 and insulin dependent Akt signal transduction, and raise the possibility that impaired IGF-1/Akt signaling is involved in PINK1-related Parkinsonism by increasing the vulnerability of dopaminergic neurons to stress-induced cell death.
Akt	207	AKT1	PINK1	65018	PINK1		PMC4640816	PINK1 protects cells against various stresses through activation of Akt via mammalian target of rapamycin complex 2 (mTORC2) [, ], regulation of Bcl-xL [, ] and elimination of damaged mitochondria [, ].
Rac	207	AKT1	plexin-B1	5364	PLXNB1	12372594		Previously, we have shown that plexin-B1 binds activated Rac, but that clustering of plexin-B1 causes Rho activation, resulting in stress fiber formation.
Rac	207	AKT1	plexin-B1	5364	PLXNB1	12372594		Previously, we have shown that plexin-B1 binds activated Rac, but that clustering of plexin-B1 causes Rho activation, resulting in stress fiber formation.
Akt	207	AKT1	PODXL	5420	PODXL		PMC3627468	Taken together, these findings suggest that PODXL enhances the activation of the PI3K/Akt signaling pathway and, thereby, promotes astrocytoma cell survival against apoptotic stress.
Akt	207	AKT1	Alpha-melanocyte stimulating hormone	5443	POMC	24316214		Alpha-melanocyte stimulating hormone protects retinal pigment epithelium cells from oxidative stress through activation of melanocortin 1 receptor-Akt-mTOR signaling.
Akt	11651	AKT1	periostin	281960	POSTN		PMC3856010	Activation of Akt can be mediated by hormones [], cytokines of the IL-6 family [] and other plasma proteins like periostin, which are all elevated during cardiac stress [,].
AKT	207	AKT1	periostin	10631	POSTN		PMC3556080	The PI3-K/AKT pathway has been described in several reports to be the critical pathway involved in regulation of periostin-induced tumorigenesis and prevention of stressed-induced tumor cell apoptosis in both colon and pancreatic cancer , ; specifically, periostin can induce the phosphorylation of AKT by binding a6b4 integrins .
Akt	24185	AKT1	PPAR	19013	PPARA		PMC3434663	Accordingly, western blotting revealed that PPARγ1 or PPARγ2 expression resulted in a decrease in lipogenic pathways (Akt, mTOR, Fasn, Acc) and oxidative stress (Cox-2) ().
Akt	24185	AKT1	PPAR	19013	PPARA		PMC3434663	Accordingly, western blotting revealed that PPARγ1 or PPARγ2 expression resulted in a decrease in lipogenic pathways (Akt, mTOR, Fasn, Acc) and oxidative stress (Cox-2) ().
Akt	207	AKT1	ginsenoside Rg1	5506	PPP1R3A	27177125		In conclusion, ginsenoside Rg1 had a protective effect against the H2O2‑induced oxidative stress of rBMSCs, and the specific mechanism may be associated with the activation of the PI3K/Akt pathway by ginsenoside Rg1.
PKB/Akt	11651	AKT1	PP2A	19052	PPP2CA		PMC5119498	In line with this, the authors of the same study demonstrated that REDD1 mediated the interaction of PKB/Akt with PP2A in response to endoplasmic reticulum (ER) stress.
AKT	11651	AKT1	PP2A	19052	PPP2CA		PMC4619977	Thus, we identified that oxidative stress might gradually inactivate AKT/mTOR pathway, which may be responsible for activation of PP2A.
Akt	207	AKT1	PRDX1	5052	PRDX1		PMC4226972	Specifically, PRDX1 helps to maintain ERα protein levels under oxidative stress, and inhibits the activation of Akt under oxidative stress.
AKT	207	AKT1	Prx I	5052	PRDX1		PMC5356538	In breast cancer, Prx I suppressed ROS-induced AKT phosphorylation to inhibit cell proliferation []; In lung cancer, Prx I suppressed the ROS-induced ERK/cyclin D1 pathway to inhibit tumor growth []; In pancreatic cancer, Prx I modulated P38 activation to promote cancer-cell invasion []; In liver cancer, Prx I is an immediate and sensitive marker of oxidative stress.
Akt	207	AKT1	AMPK	78975	PRKAA2		PMC4373480	The nitric oxide pathway also contributes to AMPK stimulation of glucose uptake and GLUT4 translocation in heart muscle []. Recently, Horie et al. demonstrated that oxidative stress induces GLUT4 translocation by activation of phosphoinositide 3-kinase (PI3K) and Akt and by dual AMPKK (CaMKKβ and LKB1) activation in cardiac myocytes [].
Akt	207	AKT1	AMPk	5563	PRKAA2		PMC3506510	While the Akt pathway negatively regulates autophagy through the activation of mTOR, the AMPk pathway, which senses the lack of ATP, inhibits mTOR and directly activates Atg1 (homologue of ULK1), thus promoting autophagy in response to stressors [].
Akt	207	AKT1	AMPK	5564	PRKAB1	21262957		Under these conditions, the concomitant inhibition of Akt, a cellular antagonist of AMPK, leads to further upregulation of AMPK activity and alleviates AICAr plus MTX-induced ER stress and apoptosis.
Rac	207	AKT1	PKC-delta	5580	PRKCD	15681696		Our findings demonstrate that biomechanical stress-induced IL-6 expression occurs via a mechanism that involves Ras/Rac/p38 MAPK/NF-kappaB/NF-IL6 signaling pathways, which is downregulated by PKC-delta, and suggest that modulation of this event contributes to the pathogenesis of atherosclerosis.
AKT	24185	AKT1	DNA-PK	5591	PRKDC		PMC4275562	DNA-activated protein kinase (DNA-PK) also activates AKT in response to various genotoxic stresses, including low doses of radiation.
Akt	11651	AKT1	DNA-PKcs	373602	PRKDC		PMC3317191	In addition, DNA-PKcs could activate Akt in response to genotoxic stresses [].
PKB/Akt	11651	AKT1	DNA-PK	5591	PRKDC		PMC4522680	In genotoxic-stressed cells, DNA-PK is also responsible for the phosphorylation of PKB/Akt on Ser473 in the DNA repair signaling pathway.
AKT	207	AKT1	mitogen activated protein kinase	19108	PRKX		PMC3709710	Antibodies against P-IKKαβ (Ser-176/180), IKKα, IκBα, P-IκBα (Ser-32), AKT, P-AKT (Ser-473), stress-activated protein kinase/c-Jun-N-terminal kinase (SAPK/JNK), P-SAPK/JNK (Thr-183/Tyr-185), c-Jun, P-c-Jun (Ser-63), P-extracellular signal regulated kinase (ERK)-1/2 (Thr-202/Tyr-204), p38 mitogen activated protein kinase (MAPK) and P-p38 MAPK (Thr-180/Tyr-182) were purchased from Cell signaling (B…
Akt	207	AKT1	PrPC	19122	PRNP		PMC5386549	PrPC has been associated with various cellular functions, including the cell cycle, cell growth, cell proliferation, cell–cell adhesion, cell migration, and the maintenance of cell shape., PrPC is strongly expressed in the central nervous system (CNS) and can act as a regulator of neuronal development, differentiation, and neurite outgrowth, which may depend on interactions with various regulator…
Akt	207	AKT1	prokineticin-2	60675	PROK2	17442730		In cardiomyocytes and H9c2 cells, prokineticin-2 or overexpressing PKR1 activates Akt to protect cardiomyocytes against oxidative stress.
Akt	207	AKT1	saposin C	5660	PSAP	15548330		Here, we report that saposin C, in a cell type-specific and dose-dependent manner, acts as a survival factor, activates the Akt-signaling pathway, down-modulates caspase-3, -7, and -9 expression and/or activity, and decreases the cleaved nuclear substrate of caspase-3 in prostate cancer cells under serum-starvation stress.
AKT	207	AKT1	PS1	5663	PSEN1	28819903		Taken together, our results indicate that the neuroprotective role of bpv involves the suppression of ER stress via the activation of the PI3K/AKT signalling pathways in APP/PS1 transgenic AD model mice.
Akt	207	AKT1	PS1wt	5663	PSEN1	11382407		Thus, overexpression of PS1wt reduced muscarinic receptor-mediated activation of AP-1, and PS1m overexpression caused greater inhibition, but stress-induced activation of Akt and HSF-1 was unaffected by either PS1wt or PS1m.
Akt	207	AKT1	p28(GANK)	5716	PSMD10	19736567		We also demonstrated that p28(GANK) increases p38 mitogen-activated protein kinase and Akt phosphorylation, and inhibits nuclear factor kappa B (NF-kappaB) activation under ER stress, which in turn contributes to GRP78 upregulation.
Akt	207	AKT1	PTEN	5728	PTEN		PMC3821587	Achyranthes bidentata Polypeptides Inhibited PTEN and Activated Akt in I/R Hearts Akt activation protects against oxidative stress and myocardial I/R injury, whereas increased expression of PTEN has the opposite effect, at least in part, through suppressing Akt [,,].
Akt	207	AKT1	PTEN	5728	PTEN	24155249		Our results suggest that PTEN regulates matrix synthesis via the PI3K-Akt pathway under oxidative stress.
AKT	207	AKT1	PTEN	5728	PTEN	28819903		A PTEN inhibitor, dipotassium bisperoxo-(5-hydroxypyridine-2-carboxyl)-oxovanadate (bpv) could decrease apoptosis, induce AKT phosphorylation and inhibit the ER stress response proteins in hippocampus in APP/PS1 transgenic AD model mice.
Akt	207	AKT1	PTEN	5728	PTEN		PMC2948033	In the absence of negative regulation of the PI3K/Akt pathway by PTEN, HIV-1 infected macrophages may proactively react to stressful cytotoxic extracellular environments established by the virus-induced chemicals, ultimately elevating their chance of survival.
Akt	207	AKT1	PTEN	5728	PTEN		PMC3256302	It has not been tested whether this downregulation of Akt signaling in response to APF is dependent on PI3-kinase or the PTEN pathway, which is an important upstream inhibitor of Akt signaling [,]. p53-p21 Signaling Activation of the p53 pathway is stimulated by stress signals (such as DNA damage and oxidative stress) and activated oncogenes [-].
Akt	207	AKT1	PTEN	5728	PTEN		PMC4042152	The phosphoinositide 3-kinase (PI3K)/Akt pathway is the major signaling pathway for cell growth and survival.() Phosphatase and Tensin homolog deleted from chromosome 10 (PTEN) inhibits PI3K and acts as a negative regulator of the PI3K/Akt pathway.(,) DJ-1 directly binds to PTEN to inhibit its enzymatic activity: DJ-1 exhibit its cytoprotective action via the promotion of the PI3K/Akt pathway.(,)…
Akt	207	AKT1	PTEN	5728	PTEN		PMC4826942	In nonstressed cells, the activity of prosurvival pathways (such as PI3K/Akt) is negatively regulated by their inhibitors (such as PTEN).
Akt	207	AKT1	PTEN	5728	PTEN		PMC3416855	In addition, increased oxidative/nitrative stress might arise from increased production of NO by eNOS, activated by the Akt pathway, which is normally negatively regulated by PTEN; SCO2 deficiency resulting in oxidative DNA damage , ; and loss/decrease in assembled CCO - as it has been observed with mutations in SCO2 - could also affect the activity of Complex III, the major site for ROS producti…
Akt	207	AKT1	PTEN	5728	PTEN		PMC5354822	In addition to EGFR mutations, PI3K/Akt survival signaling, PTEN-induced cell death, and other recently described mechanisms, continued study of EGF–EGFR signaling under conditions of oxidative stress might reveal changes in target gene activation.
ILK	3611	ILK	PTEN	5728	PTEN	23591626		Immunofluorescence staining analysis showed that HBx disrupted stress fiber formation and that focal adhesion kinase (FAK) and integrin-linked kinase (ILK) were regulated by HBx-mediated phosphatase and tensin homolog (PTEN).
LRRK2	120892	LRRK2	PTEN	5728	PTEN		PMC4578564	In PD, increased cell death is seen in dopaminergic neurons (DNs) with complicated genetic stress, such as mutations in α-synuclein, leucine-rich repeat kinase 2 (LRRK2), PTEN-induced putative kinase 1 (PINK), and parkin, as well as with environmental stress.
LRRK2	120892	LRRK2	PTEN	5728	PTEN		PMC2976734	Proteins associated with familial PD, such as PTEN-induced putative kinase 1 (PINK1), DJ-1, alpha-synuclein, leucine-rich repeat kinase 2 (LRRK2) and, possibly, parkin, are either mitochondrial proteins or are associated with mitochondria, and have a role on oxidative stress [].
LRRK2	120892	LRRK2	PTEN	5728	PTEN	26399642		Fibroblasts derived from familial PD patients harboring leucine-rich repeat kinase 2 (LRRK2), PTEN-induced putative kinase 1 (PINK1), and Parkin mutations show clear disease-relevant mitochondrial phenotypes, which are exacerbated under conditions of pharmacological stress.
leucine rich repeat kinase 2	120892	LRRK2	phosphatase and tensin homolog	5728	PTEN		PMC5367356	Proteins associated with familial PD, including phosphatase and tensin homolog-induced putative kinase 1 (PINK1), Parkinsonism associated deglycase (DJ-1), synuclein alpha (SNCA) and leucine rich repeat kinase 2 (LRRK2), are either mitochondrial proteins or mitochondria-associated, and all interface with pathways involved with oxidative stress and free radical damage ().
LRRK2	120892	LRRK2	phosphatase and tensin homolog	5728	PTEN		PMC5367356	Proteins associated with familial PD, including phosphatase and tensin homolog-induced putative kinase 1 (PINK1), Parkinsonism associated deglycase (DJ-1), synuclein alpha (SNCA) and leucine rich repeat kinase 2 (LRRK2), are either mitochondrial proteins or mitochondria-associated, and all interface with pathways involved with oxidative stress and free radical damage ().
Akt	207	AKT1	FAK	5747	PTK2		PMC4042264	Related to the Ca2+ balance, WNV for example induces a Ca2+ influx early after infection of cells that has been associated with a virus-induced rearrangement of the ER membrane and activation of different cellular kinases involved in stress response and cell survival, focal adhesion kinase (FAK), mitogen-activated extracellular signal-regulated protein kinase (ERK1/2), and protein-serine kinase B…
Akt	11651	AKT1	FAK	14083	PTK2		PMC4552534	For instance, the MGF that is locally produced in skeletal muscle submitted to mechanical stress causes hypertrophy by activating the IGF receptors (Hill and Goldspink ) and, as discussed below, FAK stimulates p70S6K1 without Akt activation (Klossner et al. ).
Akt	207	AKT1	FAK	14083	PTK2		PMC3835261	FAK KO Prevents IP‐induced PI3K/Akt Signaling Our previous studies demonstrated that IP and heat stress activate both FAK and Akt and that interference with FAK activity prevents heat stress‐elicited Akt activation, indicating that Akt becomes activated downstream of FAK in the hypothesized cytoskeletal‐based survival pathway.
Akt	207	AKT1	PP2A	5524	PTPA	24581231		We have reported that TGFβ/PKA/PP2A-mediated tumor suppressor signaling regulates Akt phosphorylation in association with the dissociation of survivin/XIAP complexes leading to inhibition of stress-dependent induction of cell survival.
AKT	11651	AKT1	RAB25	57111	RAB25		PMC5610242	Constitutive RAB25 activity is attributed to a glutamine-to-leucine substitution at position 70 in its GTP-binding domain, compared to other RAB-family members, and has been mechanistically linked to oncogenic phenotypes through activation of AKT signaling, protection against metabolic stress, and recycling of receptor tyrosine kinases, and α5β1 integrins, , .
Akt	207	AKT1	Rb1	5925	RB1	24975098		Ginsenoside Rb1 improves postoperative fatigue syndrome by reducing skeletal muscle oxidative stress through activation of the PI3K/Akt/Nrf2 pathway in aged rats.
TBK1	29110	TBK1	REV3-L	5980	REV3L		PMC4493955	These biomechanisms can be grouped in 6 clusters of cellular functions: (A) movement, proliferation and migration of cells (ANX2, F2, FGA, GRB2, BiP, MSN, PA2G4, THBS1, TLN1, TPM1, VASP, VASP28, VCL), (B) cellular assembly and organization (ARPC2, F2, PLEK, TBK1, THBS1, TPM1, (C) regulation and metabolism (NFX1, CC88B, S100A10), (D) chaperones and stress response (VDAC2, HSPA1A, HSPA1B, BiP), (E)…
Akt	207	AKT1	Rc	9104	RGN	23918648		Ginsenoside Rc modulates Akt/FoxO1 pathways and suppresses oxidative stress.
Rac	207	AKT1	Rho	509933	RHO		PMC2773925	Since Rac and Rho proteins are negative regulators of each other , it remains to be seen if the stress-induced Rac activation leads to inhibition of Rho at the cell periphery.
Rac	11651	AKT1	Rho	509933	RHO		PMC2171799	Rho induces actin reorganization via the downstream effectors Rok-α and mDIA, which cooperate in the formation of stress fibers (), but antagonize each other in Rho-dependent Rac activation ().
Pkc1	48311	PRKCA	Rho1	36775	RHOC		PMC5618247	Third, it was recently shown that Pkc1 function is required for repolarization of the actin cytoskeleton after the application of a heat shock stress, a condition that also activates Ypk1 [], that actin repolarization was greatly impaired in a cho1∆ mutant (which lacks PtdSer synthase and thus can only produce this lipid via the Kennedy pathway), and that physical interaction of Rho1 with Pkc1 is…
Rac	207	AKT1	Rho	29984	RHOD		PMC1769496	Results Rac inhibits thrombin-induced stress fiber formation and Rho activation In order to investigate the interplay between Rho and Rac signaling, we tested whether thrombin-dependent stress-fiber formation was sensitive to Rac signaling (Figure ).
Rac	11651	AKT1	Rho	29984	RHOD		PMC1769496	While exploring the underlying mechanism, we observed that Rac effector domain mutants that do not to bind Pak1, a Rac effector, fail to inhibit thrombin-induced stress fiber formation and Rho activation.
Rac	11651	AKT1	Rho	29984	RHOD		PMC2174243	However, dominant expression of cofilin-S3A had no effect on the Rho-induced stress fiber, Rac-induced lamellipodia, and Cdc42-induced filopodia formations in our system.
Rac	207	AKT1	Rho	29984	RHOD	11525641		Surprisingly, Rho activation was not present in collagen-induced haptotaxis or stimulation of chemotaxis by VEGF, although Rho induced stress fibers and focal adhesions similar to Rac activation.
Rac	207	AKT1	Rho	29984	RHOD	12919678		We previously reported that the Rho-Rho kinase pathway controls cyclin D1 expression by preventing its early G1 phase induction in response to Rac and/or Cdc42, thus increasing its dependence on ERK signaling and actin stress fiber formation.
Rac	207	AKT1	Rho	29984	RHOD		PMC2895541	These have been clearly identified as regulators of cytoskeletal element within the cell, and classically Rac is required for lamellipodia protrusion, Rho promoting assembly of actin stress fibres, and Cdc42 contributing to filopodia and membrane ruffles.
AKT	207	AKT1	Rho	29984	RHOD		PMC3634053	The significant signaling pathways identified included those involved in apoptosis, cell cycle regulation, nuclear receptor signaling, and xenobiotic metabolism (aryl hydrocarbon receptor signaling), cancer (polyamine regulation in colon cancer and phosphoinositide 3-kinase (PI3K)/protein kinase B (AKT) signaling), cardiovascular signaling (intrinsic prothrombin activation pathway), cellular grow…
Rac	11651	AKT1	Rho	29984	RHOD		PMC2196875	It is interesting to note that DH domains in other cytoskeletal proteins, like trio, () activate GTPases of the Rho family, which are involved in actin cytoskeletal reorganization, like the formation of stress fibres by Rho and membrane ruffling induced by Rac.
MK2	9261	MAPKAPK2	RIPK1	19766	RIPK1		PMC5459754	Since MK2 is activated under various stress conditions that stimulate p38 (), such as UV irradiation, heat shock, oxidative stress, hyperosmolarity, bacterial infection, and different cytokines, it is tempting to speculate that MK2 regulates RIPK1 under many of these stress conditions.
AKT	207	AKT1	Rit	19769	RIT1		PMC4150988	Recently, studies in Rit knockout mice demonstrated that Rit promotes survival after oxidative stress through activation of a p38-AKT-BAD signaling cascade.
MK2	9261	MAPKAPK2	Rit	6016	RIT1		PMC3689566	Expression of activated Rit in PC6 cells was shown to stimulate MK2 activity and increase levels of phosphorylated HSP27 in a p38-dependent fashion, while silencing endogenous Rit inhibited stress-mediated MK2 and HSP27 phosphorylation.
Akt	207	AKT1	ROS	6098	ROS1	21620957		The employment of several inhibitors and antioxidants indicates that a ROS-induced stress-sensitive p38 MAPK/ERK-Akt cascade plays a critical role in the regulation of PA on cell cycle and cell proliferation.
MK2	9261	MAPKAPK2	RSK1	6195	RPS6KA1	24705157		Eleven mammalian MAPKAPKs have been identified: ribosomal-S6-kinases (RSK1-4), mitogen- and stress-activated kinases (MSK1-2), MAPK-interacting kinases (MNK1-2), MAPKAPK-2 (MK2), MAPKAPK-3 (MK3), and MAPKAPK-5 (MK5).
MAPKAPK-2	9261	MAPKAPK2	RSK1	6195	RPS6KA1	24705157		Eleven mammalian MAPKAPKs have been identified: ribosomal-S6-kinases (RSK1-4), mitogen- and stress-activated kinases (MSK1-2), MAPK-interacting kinases (MNK1-2), MAPKAPK-2 (MK2), MAPKAPK-3 (MK3), and MAPKAPK-5 (MK5).
Akt	207	AKT1	Msk1	9252	RPS6KA5	11350959		Instead, Akt was phosphorylated at both threonine 308 and serine 473 and activated by UVB-activated mitogen- and stress-activated protein kinase 1 (Msk1).
MAPKAPK-2	9261	MAPKAPK2	MSK1	9252	RPS6KA5	11277743		The four compounds inhibit MSK1 (mitogen and stress activated kinase) and MAPKAPK-2 (mitogen activated protein kinase activated protein kinase), two protein kinases involved in mitogen and stress signal transduction.
Akt	207	AKT1	p70S6K	6198	RPS6KB1	20230819		Inhibition of PI3K or mTOR/p70S6K by wortmannin and rapamycin, respectively, increased apoptosis and inhibited phosphorylation of Akt and p70S6K induced by single-dose oxidative stress.
PDK1	38017	PDPK1	S6K1	38654	RPS6KB1		PMC3291999	S6K1 can also be activated by TOR-insensitive signalling pathways such as PDK1, MAPK and SAPK (stress-activated protein kinase).
Akt	207	AKT1	p53R2	50484	RRM2B	22954457		Akt phosphorylation in human chondrocytes is regulated by p53R2 in response to mechanical stress.
AKT	207	AKT1	Runx2	860	RUNX2	18378684		Taken together, our data demonstrate a critical role for AKT-mediated induction of Runx2 in oxidative stress-induced VSMC calcification.
AKT	207	AKT1	Runx2	860	RUNX2		PMC5542469	Oxidative stress induces vascular SMC calcification by upregulation of Runx2, which is mediated by activation of the AKT/FOXO1/3 signaling axis.
AKT	11651	AKT1	Runx2	860	RUNX2		PMC5011184	Consistently, we demonstrated that oxidative stress induced VSMC calcification by up-regulation of Runx2, which is mediated by the activation of the AKT/FOXO1/3 signaling axis via inhibiting Runx2 ubiquitination that leads to increased Runx2 transactivity , .
AKT	207	AKT1	Runx2	860	RUNX2		PMC4317224	Regarding the osteogenic differentiation of vascular smooth muscle cells, Byon et al. () demonstrated that the AKT-mediated induction of Runx2 plays a critical role in oxidative stress-induced calcification in smooth muscle cells.
Akt	207	AKT1	sphingosine-1-phosphate receptor 1	1901	S1PR1	29244772		Examination of macrophages in culture revealed that the sphingosine-1-phosphate receptor 1 selective agonist, SEW2871 or high density lipoprotein (HDL), protected macrophages against apoptosis induced by endoplasmic reticulum (ER) stress or oxidized LDL, through activation of phosphatidylinositol-3-kinase/Akt signaling.
Rac	207	AKT1	S1PR1	1901	S1PR1		PMC3536755	These receptors can act through several different signaling pathways: S1PR1 and S1PR3 ultimately activate Rac to alter stress fiber function and promote cell migration toward S1P, and have been implicated in LN , .
Rac	207	AKT1	S1P2	9294	S1PR2	12588974		Specific inhibition of endogenous Galpha12 and Galpha13, but not of Galphaq, by expression of respective C-terminal peptides abolished S1P2-mediated inhibition of Rac, membrane ruffling, and migration, as well as stimulation of Rho and stress fiber formation.
Rac	207	AKT1	S1PR3	1903	S1PR3		PMC3536755	These receptors can act through several different signaling pathways: S1PR1 and S1PR3 ultimately activate Rac to alter stress fiber function and promote cell migration toward S1P, and have been implicated in LN , .
AKT	207	AKT1	SERPINA3K	20714	SERPINA3		PMC2605247	At 15 min, the SERPINA3K treatment prevented the phosphorylation of PLC induced by H2O2 (60% reduction), but did not inhibit the phosphorylation of the ERK or PI3K/AKT kinases, suggesting that SERPINA3K specifically blocks the activation of PLC under oxidative stress (). SERPINA3K binds to rMC-1 cells To investigate if the protective effect of SERPINA3K is mediated through a receptor on the cell …
PKCalpha	5578	PRKCA	PAI-1	5054	SERPINE1	19644850		In SW-1353 chondrocytes subjected to 2 hours of shear flow, moderate shear stresses (5 and 10 dyn/cm2) generated significant PAI-1 expression, which was regulated through PKCalpha phosphorylation and Sp-1 activation.
AKT	207	AKT1	neuroserpin	5274	SERPINI1	27510267		We found that neuroserpin enhanced the activation of AKT in cultures subjected to oxidative stress and that the AKT inhibitor Ly294002 blocked this neuroprotective effect.
AKT	11651	AKT1	ER	55948	SFN		PMC5523074	We expected that inhibition of AKT was too required to intercede an intrication between Par-4 and ER stress/JNK in p21 regulation by 3-AWA.
Akt	24185	AKT1	SAB	117186	SH3BP5		PMC5479385	Our finding showed that SAB can activate Akt by phosphorylating this pathway, and hence the pAkt/Akt ratio was significantly elevated, protecting the renal cell from excessive oxidative stress and inflammatory process.
Akt1	280991	AKT1	EBPδ	152503	SH3D19		PMC2954122	Importantly, the activation of Akt1 in response to mitochondrial respiratory stress involves the same four signature factors (C/EBPδ, c-Rel/p50, NFAT, and CREB) and recruitment of hnRNPA2.
Akt	207	AKT1	tetratricopeptide repeat domain 3	225608	SH3TC2		PMC4501366	There are several E3 ubiquitin ligase candidates whose activities lead to Akt degradation, including the tetratricopeptide repeat domain 3 (TTC3), which specifically interacts with activated Akt (; ), the proapoptotic mitochondrial ubiquitin ligase activator of NF-κB (MULAN) E3 ligase (), the breast cancer susceptibility gene 1 (BRCA1 gene), which acts as an E3 ligase interacting with only phosph…
AkT	11651	AKT1	p66shc	20416	SHC1		PMC2954042	For instance, in fibroblasts exposed to oxidative stress, PI3K/AkT activation by ROS is mediated, at least to some extent, by p66shc []; AkT can, in turn, activate mTOR.
Pkc-B	282325	PRKCB	p66Shc	20416	SHC1		PMC3671270	The localization of p66Shc into mitochondrial intermembrane space is regulated by p66Shc posttranslational modifications including serine phosphorylation by stress kinases like Jnk-1 and Pkc-B and prolyl-isomerization by Pin-1, that induce p66Shc translocation within mitochondria [].
PKC-beta	18751	PRKCB	p66shc	20416	SHC1		PMC5522666	p66shc, which is activated by PKC-beta-2 (a substrate of Rictor complex) is known to activate Rac1., In this work we show the protective effects of nephrilin on UV-A stress in dermal fibroblasts, and on H2O2–triggered oxidative stress in both dermal fibroblasts and nicotine-pre-exposed renal proximal tubule cells.
Akt	207	AKT1	SIRT1	23411	SIRT1	26499802		Based on inhibitor screening experiments with SIRT1 promoter, we found that the PI3K-Akt-GSK3β signaling pathway is required for SIRT1 induction by ER stress.
Akt	11651	AKT1	SIRT1	23411	SIRT1		PMC3955157	SIRT1 regulates MAPK signalling via Akt-ASK1 and down-regulates pro-apoptotic molecules, leading to decreased oxidative stress/apoptotic cell death in perilesional vitiligo keratinocytes.
AKT	207	AKT1	SIRT6	51548	SIRT6		PMC5089070	In contrast, other stress-activated protein kinase inhibitors, such as p38, ERK, mTOR, AKT, CDK, and Raf, did not affect the ability of SIRT6 to stimulate DSB repair in response to oxidative stress ().
Akt	207	AKT1	MSC	51312	SLC25A37		PMC4624067	Akt regulates MnSOD expression in lycopene-stimulated MSCs under oxidative stress conditions To elucidate the mechanism involved in the protective effects of lycopene, we tested the hypothesis that lycopene induced the attenuation of ROS generation by activating Akt signaling pathways.
Akt	207	AKT1	XCT	23657	SLC7A11		PMC4914305	Western blot analysis showed that XCT-790 treatment significantly enhanced the expression of apoptosis related proteins p-p53, p53, p27, p21, ER stress related proteins XBP, ATF-4/6, XBP, CHOP, and activated the signal molecules IκBα, p38-MAPK, Akt, and ERK, while decreased the expression of ERRα and Bcl-2 (Figure ).
DNA-PKcs	5591	PRKDC	SMARCAL1	50485	SMARCAL1		PMC3650004	Furthermore, the SMARCAL1 interaction with WRN, RPA, and DNA-PKcs was not changed by treating cells with HU (), suggesting that these interactions are not regulated by replication stress.
DNA-PKcs	5591	PRKDC	SMG-1 [-(c)	23049	SMG1		PMC3337166	However, interdependent activation between ATM and ATR is also observed [-(a)].- In addition, ATM or ATR phosphorylates DNA-PKcs in response to IR or UV/replication stress and the former is important for cellular radio-resistance and NHEJ [-(b)]., Conversely, DNA-PKcs regulates the abundance of ATM and SMG-1 [-(c)]., SMG-1 also activates in response to IR and UV, and phosphorylates p53 together w…
Lrrk2	120892	LRRK2	alpha-synuclein	6622	SNCA	19878656		Here we report an interaction between Lrrk2 and alpha-synuclein in a series of diffuse Lewy body (DLB) cases and in an oxidative stress cell based assay.
Akt	207	AKT1	ApoSOD1	6647	SOD1	28085149		Collectively, our data indicate that ApoSOD1, which is devoid of any catalytic dismutase activity, exerts a neuroprotective effect through an early activation of Ca2+/Akt/ERK1/2 pro-survival pathway that, in turn, prevents ER stress in a neurotoxic model of ALS.
Akt	207	AKT1	SOD1	6647	SOD1	15896972		We further found that reduced oxidative stress by SOD1 overexpression in rats enhanced the expression of phospho-Akt, phospho-Bad, Bad/14-3-3 binding and reduced Bad/Bcl-XL binding after SCI, as compared to wild-type rats.
PKC alpha	5578	PRKCA	SOD	6647	SOD1		PMC3909358	They revealed that PKC alpha signaling was an upstream mediator that regulates SOD gene expression, and the increase in SOD induced by PKC alpha can reduce oxidative stress.
Akt	207	AKT1	MnSOD	6648	SOD2		PMC5177936	In considering how TUDCA protects against ER stress, we hypothesized that the TUDCA-related Akt signaling pathway regulates PrPC and MnSOD.
Akt	207	AKT1	ad-ecSOD	6649	SOD3		PMC3964442	In summary, our study firstly demonstrated that the intra-myocardial transplantation of ad-ecSOD transduced BMSCs could reduce oxidative stress and apoptosis, improved cardiac function and ventricular remolding after MI injury, partly through the activation of Akt, Erk and FoxO3a signaling pathways.
Akt	207	AKT1	c-Src	6714	SRC		PMC3401164	In this study we showed that active c-Src is required to maintain constitutively active Akt in MDA-MB-231 cells, and that targeting eEF-2K inhibits this activity (). eEF-2K activity as a positive regulator of selective protein expression It has been suggested that inhibiting eEF-2K blunts the ability of transformed cancer cells to up-regulate autophagy, a cellular stress response .
MK2	9261	MAPKAPK2	STx	8128	ST8SIA2	19951368		Further characterization of the in vitro role of MK2 revealed that STx activates the p38-MK2 stress response pathway in both p38- and MK2-dependent manners in two distinct cell lines.
mitogen-activated protein kinase	3611	ILK	STAT1	6772	STAT1		PMC4852903	The bead based kit was used to look for changes in signal transducer and activator of transcription 1 (STAT1), activating transcription factor 2 (ATF2), extracellular signal-regulated kinase (Erk), heat shock 27kDa protein 1 (HSP27), c-Jun N-terminal kinase (JNK), jun proto-oncogene (c-Jun), dual specificity mitogen-activated protein kinase kinase 1 (Map2K1 or MEK1), mitogen- and stress-activated…
Akt	207	AKT1	STAT3	6774	STAT3	21997794		Leptin and amylin in combination activated STAT3, AMP-activated protein kinase (AMPK), extracellular signal-regulated kinase (ERK) 1/2 and Akt signalling pathways in an additive manner, effects that were abolished under endoplasmic reticulum (ER) stress.
AKT	207	AKT1	STAT3	6774	STAT3		PMC4673253	We also found that ovarian cancers with high mRNA LEP/LEPR levels exhibit multiple protein changes (either in level of expression or phosphorylation status) involving different signaling pathways, some of which are directly related to the response to cytokines, growth factors and hypoxia stimuli (e.g., JAK, STAT3, HIF1α, SNX), cell cycle regulation, cell growth and differentiation, the stress res…
Akt	207	AKT1	STC2	8614	STC2		PMC4791327	These data indicate that the activation of Akt and ERK 1/2 by STC2 might up-regulate cell cycle regulators and stemness factors and thus increase cell survival upon oxidative stress.
Akt	207	AKT1	LKB1	314621	STK11		PMC4373480	The nitric oxide pathway also contributes to AMPK stimulation of glucose uptake and GLUT4 translocation in heart muscle []. Recently, Horie et al. demonstrated that oxidative stress induces GLUT4 translocation by activation of phosphoinositide 3-kinase (PI3K) and Akt and by dual AMPKK (CaMKKβ and LKB1) activation in cardiac myocytes [].
Akt	207	AKT1	MST1	6789	STK4		PMC3164728	Others and we also showed that PI3K/Akt and JNK regulate MST1 activation through protein interaction and phosphorylation during stress-induced cell death , , .
AKT	207	AKT1	serine-threonine kinase	297699	STRAP		PMC2747388	Molecular targets and mechanism of action of everolimus Everolimus is an orally available inhibitor of mTOR, an intra-cytoplasmic serine-threonine kinase which recognizes stress response signals in cancer via the PI3K-AKT pathway.
3-phosphoinositide-dependent protein kinase-1	18607	PDPK1	serine-threonine kinase	20901	STRAP		PMC4942616	Several key signaling transducers (Fig. S3) activated early (≈2 months) and in a CYP2E1-dependent manner in CHIP−/−-livers were thus identified: (i) Mitogen-activated protein kinase (MAPK) JNK, activated by pro-inflammatory cytokines and cellular stresses, (ii) energy/metabolic sensor AMPK-α1-subunit (AMPKα), activated via Thr172-phosphorylation by elevated intracellular AMP and/or ROS levels, an…
Akt	207	AKT1	CHIP	10273	STUB1	18292230		Akt levels tightly regulate the expression of CHIP, such that, as Akt levels are suppressed, CHIP levels also decrease, suggesting a potential stress response feedback mechanism between ligase and kinase activity.
AKT	207	AKT1	CHIP	56424	STUB1		PMC4220119	Upstream regulators of the PMDS including E3 ligases such as CHIP such as HSF1, 2 or NRF1 could be activated or suppressed by the AKT stress response in a sex-dependent manner thereby differentially affecting proteostasis in peripheral and brain tissues.
Akt	207	AKT1	Syk	6850	SYK	10906139		Here we report that Syk is required for the activation of the phosphatidylinositol (PI) 3-kinase-Akt survival pathway in B cells exposed to oxidative stress.
AKT	207	AKT1	BK	110058	SYT17		PMC4694787	Specifically, PI3K/AKT is activated by BK via B2R in cardiomyocyte cells, which then stimulates the AKT/eNOS pathway to protect hEPCs from oxidative stress and senescence [, ].
Akt	207	AKT1	SP	7032	TFF2		PMC4982481	In conclusion, this study demonstrated that SP could stimulate the recovery of RPE cells under oxidative stress, possibly by promoting cell proliferation and inhibiting apoptosis through the activation of Akt/GSK-3β signaling.
AKT	207	AKT1	TGF-beta	7040	TGFB1		PMC5615342	Importantly, 11 pathways are frequently altered in HCCs: TERT promoter mutations activating telomerase expression (about 60%), WNT/beta-catenin (54%), PI3K-AKT-mTOR (51%), TP53/cell cycle (49%), MAPK (43%), hepatic differentiation (34%), epigenetic regulation (32%), chromatin remodeling (28%), oxidative stress (12%), IL-6/JAK-STAT (9%) and TGF-beta [].
Akt	11651	AKT1	TG2	7052	TGM2		PMC4558519	TG2 deficiency also resulted in reduced ROCK kinase activity, actin stress fiber formation and increased Akt phosphorylation in MEFs, but did not alter fibronectin matrix levels or solubility.
Akt	207	AKT1	TG2	7052	TGM2	26313919		TG2 deficiency also resulted in reduced ROCK kinase activity, actin stress fiber formation and increased Akt phosphorylation in MEFs, but did not alter fibronectin matrix levels or solubility.
Akt	207	AKT1	TLR4	7099	TLR4	22424098		Collectively, our results demonstrate that PI3K/Akt contributes to hypoxic stress-induced TLR4 expression at least partly through the regulation of HIF-1 activation.
Akt	207	AKT1	Toll-like receptor 4	7099	TLR4	22424098		PI3K/Akt contributes to increased expression of Toll-like receptor 4 in macrophages exposed to hypoxic stress.
Akt	207	AKT1	TLR9	81897	TLR9		PMC4401452	We also found that the increasing levels of phospho-Akt and phospho-GSK-3β were significantly abolished by chronic stress in wild type macrophages but not in TLR9 deficient macrophages, demonstrating that chronic stress decreases the activation of phospho-Akt/phospho-GSK-3β signaling in a TLR9-dependent manner (). TLR9 deficiency attenuates chronic stress-induced changes of apoptosis related path…
dominant negative AKT2	208	AKT2	TNF alpha	7124	TNF	12048203		Furthermore, phosphatidylinositol 3-kinase inhibitor or dominant negative AKT2 significantly enhances UV- and TNF alpha-induced apoptosis, whereas expression of constitutively active AKT2 inhibits programmed cell death in response to UV and TNFalpha -induced apoptosis by inhibition of stress kinases and provide the first evidence that AKT inhibits stress kinase JNK through activation of the NF ka…
AKT2	208	AKT2	tumor necrosis factor alpha	7124	TNF	12048203		Inhibition of JNK by cellular stress- and tumor necrosis factor alpha-induced AKT2 through activation of the NF kappa B pathway in human epithelial Cells.
Akt-1	207	AKT1	DR5	8795	TNFRSF10B		PMC3326562	Furthermore, siRNA inhibition of either Akt-1 or c-FLIP enhanced α-TEA-induced endoplasmic reticulum stress and endoplasmic reticulum stress-mediated upregulation of JNK/CHOP/DR5, indicating that suppression of prosurvival mediators by TAM + α-TEA may enhance α-TEA-induced endoplasmic reticulum stress-mediated JNK/CHOP/DR5, at least in part, via downregulation of activated Akt, which subsequently…
Rac	207	AKT1	Ack1	303882	TNK2		PMC3440356	Ack1 could phosphorylate Dbl only when in complex with Grb2 and Cdc42, which then become activated and in turn activates RhoA and Rac leading to stress fibres and membrane ruffles formation.
AKT	207	AKT1	p53	7157	TP53	21725356		Importantly, our study highlights that during transformation, DJ-1 is having a key role in the p53-regulated AKT pathway and p53-driven oxidative-stress response.
Akt	207	AKT1	p53	7157	TP53	24115477		Taken together, these results show that the netrin-1 receptor UNC5B plays a critical role in cell survival and kidney injury through Akt-mediated inactivation of p53 in response to stress.
PKB	207	AKT1	p53	7157	TP53	26318059		The majority of longevity-associated genes regulates metabolism and stress resistance, and belongs to the IGF-1R, PI3K, PKB, AMPK and TOR metabolic regulation cluster and the FOXO, HDAC, p53 stress response cluster.
PKB/Akt	11651	AKT1	p53	7157	TP53		PMC1904256	In summary, using an in vitro model of keratinocyte transformation by HPV16, we have shown that during the course of transformation, cells develop increased sensitivity to stress, which correlates with higher activation of p53 and reductions in the activities of PKB/Akt, Erk, Jnk and p38 in HF1 cells.
AKT	207	AKT1	p53	7157	TP53	20182617		This coordinated regulation of IGF-1/AKT/mTOR pathways and the endosomal compartment by the p53 pathway integrates the molecular, cellular, and systemic levels of activities and prevents the accumulations of errors in response to stress and restores cellular homeostasis after stress.
AKT	11651	AKT1	p53	7157	TP53		PMC3901111	Moreover, p53 transcriptionally activates negative regulators of the PI3K-AKT-mTOR signaling pathway such as AMPKβ, TSC2, PTEN and IGF-BP3, at least in certain cell types and in response to particular stressors [].
Akt	207	AKT1	p53	7157	TP53		PMC5374364	Genes and Pathways Responsible for the Action The signaling pathways analyzed by DMA are as follows (see Kiyama & Zhu []; Kiyama et al. []): MAPK (such as G protein–coupled receptor (GPCR)/MAPK, MAPK/c-Jun N-terminal kinase (JNK), and NF-κB/MAPK/ERK) and other (such as angiogenesis, ErbB/human epidermal growth factor receptor (HER), nuclear receptor, and ubiquitin/proteasome) signaling pathways, …
Akt	207	AKT1	p53	7157	TP53		PMC5374364	Genes and Pathways Responsible for the Action The signaling pathways analyzed by DMA are as follows (see Kiyama & Zhu []; Kiyama et al. []): MAPK (such as G protein–coupled receptor (GPCR)/MAPK, MAPK/c-Jun N-terminal kinase (JNK), and NF-κB/MAPK/ERK) and other (such as angiogenesis, ErbB/human epidermal growth factor receptor (HER), nuclear receptor, and ubiquitin/proteasome) signaling pathways, …
AKT	207	AKT1	p53	7157	TP53		PMC4599238	In response to stress, p53 inhibits mTORC1 [, ] by inducing transcription of Sestrin 1 and Sestrin 2 that activates AMP-responsive protein kinase (AMPK) to phosphorylate the mTOR inhibitor, tuberous sclerosis 2 (TSC2) [] and by negatively regulating the amino acid-sensing pathway through modulation of Gator2 [] or as RagA/B guanine nucleotide dissociation inhibitors (GDIs) []. p53 also induced PT…
Akt	207	AKT1	p53	7157	TP53		PMC4669806	On the other hand, exposure to cellular stress also can trigger another transcription factor p53 to induce apoptosis, where p53 pathway is negatively regulated by Akt activation.
MK2	9261	MAPKAPK2	p53	7157	TP53		PMC2243162	Another transducer kinase, downstream from the stress–response p38 MAPK pathway and named MAPKAP kinase-2 (MK2), is directly involved in phosphorylating effectors CDC25B and C, and in maintaining G1, S, and G2 checkpoints triggered by UV-induced DNA damage (). MAPKAP kinase-2 is activated by cisplatin, camptothecin, and doxorubicin, and the MK2 response is essential for the survival of p53-defici…
DNA-PK	5591	PRKDC	p53	7157	TP53	9466699		Thus, our results show that DNA-PK is not the main sensor for genotoxic stress and is not required for p53 activation.
Akt	207	AKT1	TRIB3	57761	TRIB3	27252525		TRIB3 blocks the phosphorylation of Akt and induces apoptosis under endoplasmic reticulum (ER) stress conditions.
Akt	207	AKT1	tribbles homolog 3	57761	TRIB3		PMC4171598	Furthermore, Δ9-THC induced eukaryotic translation initiation factor 2alpha (eIF2alpha) phosphorylation and thereby activated an ER stress response that promoted autophagy via tribbles homolog 3-dependent (TRB3-dependent) inhibition of the Akt/mammalian target of rapamycin complex 1 (mTORC1) axis [].
Akt	207	AKT1	TRB3	57761	TRIB3		PMC4171598	Furthermore, Δ9-THC induced eukaryotic translation initiation factor 2alpha (eIF2alpha) phosphorylation and thereby activated an ER stress response that promoted autophagy via tribbles homolog 3-dependent (TRB3-dependent) inhibition of the Akt/mammalian target of rapamycin complex 1 (mTORC1) axis [].
Akt	207	AKT1	TRB3	57761	TRIB3	19425170		Our data indicate that THC induced ceramide accumulation and eukaryotic translation initiation factor 2alpha (eIF2alpha) phosphorylation and thereby activated an ER stress response that promoted autophagy via tribbles homolog 3-dependent (TRB3-dependent) inhibition of the Akt/mammalian target of rapamycin complex 1 (mTORC1) axis.
Akt	207	AKT1	tribbles homolog 3	57761	TRIB3	19425170		Our data indicate that THC induced ceramide accumulation and eukaryotic translation initiation factor 2alpha (eIF2alpha) phosphorylation and thereby activated an ER stress response that promoted autophagy via tribbles homolog 3-dependent (TRB3-dependent) inhibition of the Akt/mammalian target of rapamycin complex 1 (mTORC1) axis.
AKT	207	AKT1	Trib3	57761	TRIB3		PMC5483452	ER stress can promote autophagy via Trib3-dependent inhibition of the AKT/mTORC1 axis in cannabinoid-induced human and mouse cancer cell death (Salazar et al., ).
Akt	11651	AKT1	TRB3	57761	TRIB3		PMC2817393	In contrast, during severe or persistent ER stress, induction of TRB3 would be more robust, leading to apoptosis through a mechanism involving TRB3-mediated inhibition (dephosphorylation) of Akt [, ].
AKT	11651	AKT1	Tribbles homolog 3	57761	TRIB3		PMC3998192	Tribbles homolog 3 (TRIB3), a pseudokinase, plays a critical role in the regulation of several signaling pathways involved in cell survival and/or cell stress, and inhibits phosphorylation of AKT/protein kinase B (AKT), which is an important enzyme in the signal transduction of growth factor receptors [,].
AKT	11651	AKT1	Tribbles homolog 3	57761	TRIB3		PMC3998192	Tribbles homolog 3 (TRIB3), a pseudokinase, plays a critical role in the regulation of several signaling pathways involved in cell survival and/or cell stress, and inhibits phosphorylation of AKT/protein kinase B (AKT), which is an important enzyme in the signal transduction of growth factor receptors [,].
AKT	11651	AKT1	TRIB3	57761	TRIB3		PMC3998192	Tribbles homolog 3 (TRIB3), a pseudokinase, plays a critical role in the regulation of several signaling pathways involved in cell survival and/or cell stress, and inhibits phosphorylation of AKT/protein kinase B (AKT), which is an important enzyme in the signal transduction of growth factor receptors [,].
AKT1	280991	AKT1	TRIB3	57761	TRIB3		PMC3722315	Taken together, we speculate that salinomycin upregulates DDIT3 due to an ER stress response and, in turn, induces TRIB3 expression, which consequently inhibits AKT1 activation and MTORC1, leading to autophagy.
Akt	207	AKT1	TRB3	57761	TRIB3	28782643		Knocking down TRB3 attenuated endoplasmic reticulum stress, enhanced Akt phosphorylation, and protected neurons from apoptosis in response to GCI/R.
PKC	48311	PRKCA	TRB3	57761	TRIB3		PMC5466392	TRB3, as a related molecule of ER stress-induced apoptosis, regulates PKC.
MAPKAPK2	9261	MAPKAPK2	TSC1	7248	TSC1		PMC4642562	Phosphorylation of the TSC1/2 complex is regulated by multiple signaling pathways including Akt, Erk, AMPK, RSK, GSK3β and p38/MAPKAPK2, many of which have been previously reported to be affected by osmostress.
Akt	207	AKT1	TSC2	22084	TSC2		PMC4642562	Pharmacological inhibition of Akt caused both inhibition of mTORC1 () and a mild but significant recruitment of TSC2 to lysosomes (), as previously reported (in PTEN-null MEFs), indicating that inhibition of Akt contributes towards mTORC1 inactivation and lysosomal recruitment of TSC2 in response to osmostress.
Akt	207	AKT1	TSC2	22084	TSC2		PMC4642562	Pharmacological inhibition of Akt caused both inhibition of mTORC1 () and a mild but significant recruitment of TSC2 to lysosomes (), as previously reported (in PTEN-null MEFs), indicating that inhibition of Akt contributes towards mTORC1 inactivation and lysosomal recruitment of TSC2 in response to osmostress.
Akt	207	AKT1	TTC3	7267	TTC3		PMC4501366	There are several E3 ubiquitin ligase candidates whose activities lead to Akt degradation, including the tetratricopeptide repeat domain 3 (TTC3), which specifically interacts with activated Akt (; ), the proapoptotic mitochondrial ubiquitin ligase activator of NF-κB (MULAN) E3 ligase (), the breast cancer susceptibility gene 1 (BRCA1 gene), which acts as an E3 ligase interacting with only phosph…
Akt	11651	AKT1	Trx1	7295	Txn1		PMC4914256	[] demonstrated that Trx1 overexpression induces Akt-signaling pathway compared to WT mice during ischemic stress, and this could be related to a reduction in oxidative stress.
Akt	207	AKT1	Trx1	7295	Txn1		PMC4914256	[] showed that Trx1 overexpression induces Akt-signaling pathway compared to wild type mice during ischemic stress, and this could be related to a reduction in oxidative stress.
Akt	207	AKT1	TXNIP	10628	TXNIP	28367274		It has been shown that thioredoxin-interacting protein (TXNIP) overexpression renders cells more susceptible to oxidative stress and promotes apoptosis and that the activation of PI3K/Akt pathway leads to a downregulation of TXNIP.
Akt	24185	AKT1	ubiquitin	176718	UBA52		PMC4670908	Akt kinase directly inhibits the antiaging forkhead FoxO family transcription factor (FOXO), known to regulate autophagy, DNA repair, ubiquitin-proteasome system, and other stress resistance genes [].
Akt	207	AKT1	urocortin	7349	UCN		PMC4316969	By contrast, urocortin induced a significant increase (P<0.01) in the phosphorylation of Akt and GSK-3β in the myocardium, while astressin inhibited the effect of urocortin on Akt and GSK-3β phosphorylation ().
Akt	207	AKT1	urocortin	7349	UCN		PMC4316969	By contrast, urocortin induced a significant increase (P<0.01) in the phosphorylation of Akt and GSK-3β in the myocardium, while astressin inhibited the effect of urocortin on Akt and GSK-3β phosphorylation ().
Akt	207	AKT1	VCAM-1	7412	VCAM1	19620770		Secreted sVCAM-1 induced migration of endothelial cells and CPCs and prevented cardiomyocyte death from oxidative stress through activation of Akt, ERK, and p38 MAPK.
Akt	207	AKT1	T2-TrpRS	7453	WARS	14630953		These results demonstrate that T2-TrpRS can regulate extracellular signal-activated protein kinase, Akt, and EC NO synthase activation pathways that are associated with angiogenesis, cytoskeletal reorganization, and shear stress-responsive gene expression.
Akt	207	AKT1	T2-TrpRS	7453	WARS	14630953		T2-TrpRS inhibited activation by flow of protein kinase B (Akt), extracellular signal-regulated kinase 1/2, and EC NO synthase and prevented transcription of several shear stress-responsive genes.
Akt1	207	AKT1	WISP1	8840	WISP1	22475393		Here we show WISP1 prevents apoptotic degeneration in primary neurons during oxidant stress through the activation of protein kinase B (Akt1), the post-translational maintenance of β-catenin integrity that is consistent with inhibition of glycogen synthase kinase-3β (GSK-3β), and the subcellular trafficking of β- catenin to foster its translocation to the nucleus.
Akt	207	AKT1	WISP1	65154	WISP1		PMC4443788	WISP1 can activate PI 3-K, Akt, and mTOR to protect against Aβ exposure, cardiomyocyte injury, DNA damage, and oxidative stress.
Akt	207	AKT1	WISP1	65154	WISP1		PMC4443788	During oxidative stress, WISP1 can upregulate PI 3-K and Akt [, , ] and protect against Aβ exposure [], cardiomyocyte injury [], and DNA damage [] ().
MK2	9261	MAPKAPK2	WNK4	287715	WNK4		PMC4702109	First, we examined the effect of a p38MAPK inhibitor (SB202190) and MK2 inhibitor (MK-2 inhibitor III) on the ASK3-dependent phosphorylation of WNK4 at Ser575 without any osmotic stress.
AKT	207	AKT1	WNT5a	7474	WNT5A	25303486		The up-regulated expression of WNT5a in PCOS increases inflammation and oxidative stress predominantly via the phosphatidylinositol 3-kinase/AKT/NF-κB signaling pathway.
AKT	207	AKT1	WNT5a	7474	WNT5A	25303486		Up-regulated expression of WNT5a increases inflammation and oxidative stress via PI3K/AKT/NF-κB signaling in the granulosa cells of PCOS patients.
PKC	48311	PRKCA	WNT-5A	378689	wnt5a.S		PMC4713724	Indeed, WNT-5A can promote the survival of bone marrow derived MSCs following an oxidative-stress injury and can induce their differentiation into the type II alveolar epithelial cells via activation of JNK and PKC signaling []. WNT-5A also regulates spermatogenesis by supporting self-renewal and survival of spermatogonial stem cells (SSC) [].
Akt1	207	AKT1	Na(+)	7504	X-linked Kx blood group	26138884		The present observations demonstrate that Akt1 is required for the full stimulation of Na(+)/H(+) exchanger activity by LPS or oxidative stress in dendritic cells.
Akt	207	AKT1	X-box-binding protein 1	7494	XBP1	19412428		In this study, we report that melanoma cells under ER stress are more resistant to apoptosis induced by the microtubule-targeting chemotherapeutic drugs, docetaxel and vincristine, and this is, at least in part, due to activation of the phosphoinositide 3-kinase (PI3K)/Akt pathway mediated by the X-box-binding protein 1 (XBP-1) axis of the unfolded protein response.
Akt	207	AKT1	XBP-1	7494	XBP1	19412428		In this study, we report that melanoma cells under ER stress are more resistant to apoptosis induced by the microtubule-targeting chemotherapeutic drugs, docetaxel and vincristine, and this is, at least in part, due to activation of the phosphoinositide 3-kinase (PI3K)/Akt pathway mediated by the X-box-binding protein 1 (XBP-1) axis of the unfolded protein response.
Akt	207	AKT1	XIAP protein	331	XIAP		PMC2642534	The transient activation of Akt during ER stress may thus regulate cellular levels of XIAP protein, and possibly contribute the loss of XIAP protein observed at later hours of ER stress.
DNA-PK	5591	PRKDC	Ku80	22596	XRCC5		PMC5524842	ATR become activated by RPA bound to ssDNA during replication stress, while ATM and DNA-PK are activated at DSBs by the MRN-complex and Ku70/Ku80, respectively.
DNA-PK	5591	PRKDC	Ku70	14375	XRCC6		PMC5524842	ATR become activated by RPA bound to ssDNA during replication stress, while ATM and DNA-PK are activated at DSBs by the MRN-complex and Ku70/Ku80, respectively.
Akt	207	AKT1	YBX-1	4904	YBX1		PMC4730314	Environmental stresses, such as adenovirus infection, hyperthermia, oxidative stress, UV irradiation or DNA-damaging drugs, could induce YBX-1 relocation from cytoplasm to nucleus []. YBX-1 can activate E2F, PI3K/Akt/mTOR and Ras/Raf/MEK/ERK pathways to promote cancer cell proliferation []. YBX-1 expression correlated significantly with lymph node status and perforation and as a potential prognos…
Akt-1	207	AKT1	YB-1	4904	YBX1		PMC3427997	In addition, phosphorylation of YB-1 mediated by Akt-1 is regarded as the inducer for increased expression of genes related to cell proliferation and stress response by the translation of silent mRNA ().
MK2	9261	MAPKAPK2	tristetraprolin	7538	ZFP36	15014438		MK2-induced tristetraprolin:14-3-3 complexes prevent stress granule association and ARE-mRNA decay.
MK2	9261	MAPKAPK2	TTP	7538	ZFP36		PMC3135068	Furthermore, Stoecklin et al. showed that MK2-dependent phosphorylation of TTP releases it from stress granules and inhibits degradation of mRNAs containing AREs () []. Interestingly, recent studies by Marchese et al. and Clement et al. described a molecular mechanism for the regulation of TTP function by MK2, involving the inhibition of recruitment of a deadenylase complex [, ].
AKT	207	AKT1	ZNRF1	170737	ZNRF1		PMC4657170	Because our previous results showed that the ZNRF1-induced proteasomal degradation of AKT promotes Wallerian degeneration, we determined whether the oxidative stress–induced activation of ZNRF1 by EGFR-dependent phosphorylation also plays a role in promoting Wallerian degeneration.
AKT	207	AKT1	ZNRF1	84937	ZNRF1		PMC4657176	Together, these results demonstrate that EGFR-dependent phosphorylation of ZNRF1 at Y103 promotes degradation of AKT and resultant activation of GSK3β, which mediates oxidative stress–induced neuronal apoptosis ().

## Sheet: text mining results - frequenci
PreferredGeneName	Frequency
MAPK14	32
INS	31
MAPK1	21
MAPK8	18
HMOX1	17
PTEN	15
NOS3	13
TRIB3	13
TP53	12
MTOR	11
PIK3CG	11
NFE2L2	10
FOXO3	9
HSPA5	9
JUN	9
PIK3CB	9
GABPA	8
IGF1	8
RHOD	8
MAPK3	7
MAPK9	7
EIF2AK3	6
FGF2	6
GSK3B	6
HSF1	6
ATM	5
ATR	5
DDIT3	5
EGF	5
EGFR	5
EPO	5
KDR	5
PARK7	5
ABL1	4
BCR	4
ERN1	4
foxo	4
FOXO1	4
HIF1A	4
HSPB1	4
IL6	4
IPCEF1	4
PDPK1	4
PIK3CD	4
RUNX2	4
AATF	3
BAX	3
CASP3	3
CDC42	3
HSP90AA1	3
HSPB2	3
IFI27	3
IL13	3
INSR	3
MAP3K5	3
MAPKAP1	3
PRKDC	3
PTK2	3
SHC1	3
SOD1	3
WISP1	3
ADIPOQ	2
AGER	2
AGT	2
ANGPT1	2
APP	2
APRT	2
ATF2	2
ATF4	2
BDNF	2
BDNF-AS	2
CAPZB	2
CDKN1A	2
CHEK1	2
CLU	2
CREB1	2
CRTC2	2
EEF1A1	2
FBXO18	2
FGF1	2
GAB1	2
GCG	2
GLRX	2
GRN	2
GSTT1	2
HDAC9	2
HIST3H3	2
HNRNPA2B1	2
HSPA4	2
IGF1R	2
MAP4K1	2
MAPK11	2
MAPK7	2
MCF2	2
MDM2	2
MMP1	2
MMP12	2
NDRG2	2
NFKB1	2
NRG1	2
PAK1	2
PARP1	2
PAWR	2
PIK3CA	2
PINK1	2
PLXNB1	2
POSTN	2
PPARA	2
PPP2CA	2
PRDX1	2
PRKAA2	2
PSEN1	2
RHO	2
RIT1	2
RPS6KA1	2
RPS6KA5	2
RPS6KB1	2
S1PR1	2
SIRT1	2
STAT3	2
STRAP	2
STUB1	2
TGM2	2
TLR4	2
TNF	2
TSC2	2
Txn1	2
UCN	2
WARS	2
WNT5A	2
XBP1	2
YBX1	2
ZFP36	2
ZNRF1	2
AFAP1	1
AGC2-1	1
AGTR2	1
AKR1B1	1
AKT1	1
ALDH1A1	1
ANG	1
ANGPT2	1
ANKRD2	1
APLN	1
ARHGAP15	1
ARHGDIA	1
ATP6V1E1	1
BAD	1
BAK1	1
BCL2L1	1
Bcl2l11	1
BCL3	1
BECN1	1
BMF	1
BRAT1	1
BSG	1
CALM3	1
CAMKK1	1
CAPRIN1	1
CAV1	1
CBL	1
CBL10	1
CBLN1	1
CDC25B	1
CDH13	1
CDH5	1
CDKN1B	1
CDKN2A	1
CFL1	1
CHEK2	1
CIDEA	1
CIPK23	1
CNR2	1
CREM	1
CRH	1
CRTC1	1
CSF2	1
CSNK2A2	1
CTF1	1
CTGF	1
CXCL12	1
CYBA	1
CYBB	1
daf-16	1
DEK	1
DPP4	1
DRD2	1
DUOX1	1
EDN1	1
EEF1B2P2	1
ELAVL1	1
ERAS	1
ETV1	1
F630028O10Rik	1
FGF10	1
FGF21	1
FGF7	1
FIG4	1
FLNC	1
FSHB	1
GHRL	1
GLP2R	1
GPI	1
GRB10	1
GSK3A	1
GSN	1
H2AFX	1
HCRT	1
HK2	1
HNRNPA1	1
HSD11B1	1
HSP90B1	1
Hspa1a	1
HSPA8	1
HSPD1	1
IFNG	1
IL15	1
IL26	1
IL4	1
ILK	1
INPPL1	1
IRF3	1
IRS2	1
ITGB1	1
ITGB1BP2	1
JAK2	1
JUNB	1
KANK1	1
KAT2A	1
KAT3	1
KIDINS220	1
klotho	1
KRAS	1
KRT71	1
LEP	1
LIMK1	1
LYN	1
MAP2K3	1
MAP2K4	1
MAP2K5	1
MAP2K7	1
MAP3K3	1
MAPK8IP1	1
MAPKAPK2	1
MAPKAPK3	1
MAPKAPK5	1
MCL1	1
MERTK	1
MIR19B1	1
MLIP	1
MMP9	1
MPZ	1
MSTN	1
MVP	1
NAMPT	1
NCOA3	1
NCS1	1
NPM1	1
NQO1	1
NR1D1	1
NR4A1	1
NRF1	1
NTF3	1
OR51V1	1
OSM	1
PDCD4	1
PDGFRB	1
PDIK1L	1
PECAM1	1
phlda3	1
PHLPP1	1
PIDD1	1
PIK3C3	1
PIM1	1
PODXL	1
POMC	1
PPP1R3A	1
PRKAB1	1
PRKCD	1
PRKX	1
PRNP	1
PROK2	1
PSAP	1
PSMD10	1
PTPA	1
RAB25	1
RB1	1
REV3L	1
RGN	1
RHOC	1
RIPK1	1
ROS1	1
RRM2B	1
S1PR2	1
S1PR3	1
SERPINA3	1
SERPINE1	1
SERPINI1	1
SFN	1
SH3BP5	1
SH3D19	1
SH3TC2	1
SIRT6	1
SLC25A37	1
SLC7A11	1
SMARCAL1	1
SMG1	1
SNCA	1
SOD2	1
SOD3	1
SRC	1
ST8SIA2	1
STAT1	1
STC2	1
STK11	1
STK4	1
SYK	1
SYT17	1
TFF2	1
TGFB1	1
TLR9	1
TNFRSF10B	1
TNK2	1
TSC1	1
TTC3	1
TXNIP	1
UBA52	1
VCAM1	1
WNK4	1
wnt5a.S	1
XIAP	1
X-linked Kx blood group	1
XRCC5	1
XRCC6	1
