# Supplementary material for: The PI3K and MAPK/p38 pathways control stress granule assembly in a hierarchical manner
Source: Life Sci Alliance. 2019 Mar 28;2(2):e201800257. doi: 10.26508/lsa.201800257 (PMC6441495; doi:10.26508/lsa.201800257)
Supplement: Supplementary file 8 [file LSA-2018-00257_TableS1.xlsx]

## Sheet: Table S1
Model #	AIC	AICc	BIC
I	9516.59	9571.4	9850.79
II	8788.06	8844.35	9126.15
III	1127.23	1185.03	1469.21
IV	1245.65	1303.45	1587.63
V	1108.7	1171.17	1462.33
