# Supplementary material for: The PI3K and MAPK/p38 pathways control stress granule assembly in a hierarchical manner
Source: Life Sci Alliance. 2019 Mar 28;2(2):e201800257. doi: 10.26508/lsa.201800257 (PMC6441495; doi:10.26508/lsa.201800257)
Supplement: Supplementary file 10 [file LSA-2018-00257_TableS3.xls]

## Sheet: Table S3
Parameter	Value (log10)	Value	Lower bound (log10)	Upper bound (log10)
init_X2_0_Ars	0.483	3.04089	-5	1
init_X2_0_Mk	0.649	4.45656	-5	1
init_X2_0_Wm	0.997	9.93116	-5	1
init_X2_2_Ars	-3.511	0.000308319	-5	1
init_X2_2_Mk	-3.704	0.000197697	-5	1
init_X2_2_Wm	-3.68	0.00020893	-5	1
init_X4_0_Ars	-3.032	0.000928966	-5	1
init_X4_0_Wm	0	1	-5	1
init_X4_0_Mk	-3.45	0.000354813	-5	1
init_X4_1_Ars	-5	1e-05	-5	1
init_X4_1_Wm	-5	1e-05	-5	1
init_X4_1_Mk	-4.144	7.17794e-05	-5	1
init_X5_0_Ars	0.927	8.45279	-5	1
init_X5_0_Mk	0.846	7.01455	-5	1
init_X5_0_Wm	1	10	-5	1
init_X5_1_Ars	-5	1e-05	-5	1
init_X5_1_Wm	-5	1e-05	-5	1
init_X5_1_Mk	-5	1e-05	-5	1
init_X8_0_Ars	-1.783	0.0164816	-5	1
init_X8_0_Mk	-2.434	0.00368129	-5	1
init_X8_0_Wm	-5	1e-05	-5	1
init_X8_1_Ars	-2.17	0.00676083	-5	1
init_X8_1_Mk	-2.86	0.00138038	-5	1
init_X8_1_WmFr	0	1	-5	0
init_X8_2_Ars	-2.641	0.0022856	-5	1
init_X8_2_Mk	-4.652	2.22844e-05	-5	1
init_X8_2_WmFr	-1.777	0.0167109	-5	0
init_X9_0_Ars	0.19	1.54882	-5	1
init_X9_0_Mk	0.578	3.78443	-5	1
init_X9_0_Wm	0.026	1.0617	-5	1
init_X9_2_Ars	-2.327	0.00470977	-5	1
init_X9_2_Mk	-2.863	0.00137088	-5	1
init_X9_2_Wm	-2.766	0.00171396	-5	1
init_X10_0_Ars	-2.625	0.00237137	-5	1
init_X10_0_Mk	0.52	3.31131	-5	1
init_X10_0_Wm	0.312	2.05116	-5	1
init_X10_1_Ars	-2.9	0.00125893	-5	1
init_X10_1_Mk	-3.092	0.000809096	-5	1
init_X10_1_Wm	-3.336	0.000461318	-5	1
init_X10_2_Ars	-2.103	0.0078886	-5	1
init_X10_2_Mk	-3.638	0.000230144	-5	1
init_X10_2_Wm	-5	1e-05	-5	1
init_X11_0_Ars	0.659	4.56037	-5	1
init_X11_0_Mk	0.939	8.6896	-5	1
init_X11_0_Wm	0.518	3.2961	-5	1
init_X11_1_Ars	-2.082	0.00827942	-5	1
init_X11_1_Mk	-3.067	0.000857038	-5	1
init_X11_1_Wm	-2.87	0.00134896	-5	1
init_X11_2_Ars	-3.247	0.000566239	-5	1
init_X11_2_Mk	-3.662	0.000217771	-5	1
init_X11_2_Wm	-3.458	0.000348337	-5	1
init_X12_0_Ars	0.751	5.63638	-5	1
init_X12_0_Mk	0.848	7.04693	-5	1
init_X12_0_Wm	0.807	6.4121	-5	1
init_X12_1_Ars	-2.191	0.00644169	-5	1
init_X12_1_Mk	-2.291	0.00511682	-5	1
init_X12_1_Wm	-2.451	0.00353997	-5	1
